# Supplementary material for: Ring-opening C(sp3)–C coupling of cyclobutanone oxime esters for the preparation of cyanoalkyl containing heterocycles enabled by photocatalysis
Source: Royal Society of Chemistry journal article supplement (doi:10.1039/c9qo00625g), 2019-01-01

## Supporting Information

# Ring-opening C(sp<sup>3</sup>)-C coupling of cyclobutanone oxime esters for the preparation of cyanoalkyl containing heterocycles enabled by photocatalysis

Wei Zhang,<sup>a,b</sup> Yu-Liang Pan,<sup>a</sup> Chen Yang,<sup>a</sup> Xin Li<sup>a</sup> and Bin Wang<sup>\*b</sup>

<sup>a</sup> State Key Laboratory of Elemento-organic Chemistry, College of Chemistry, Nankai University, Tianjin 300071, China.

<sup>b</sup> Tianjin Key Laboratory of Structure and Performance for Functional Molecules, MOE Key Laboratory of Inorganic-Organic Hybrid Functional Material Chemistry, College of Chemistry, Tianjin Normal University, Tianjin 300387, P. R. China.

hxywangb@tjnu.edu.cn (B. Wang)

### Contents

|                                                                      |     |
|----------------------------------------------------------------------|-----|
| 1. General Information.....                                          | S2  |
| 2. General Procedure and Spectral Data of Products.....              | S3  |
| 2.1 General procedure for synthesis of products <b>3aa-3aq</b> ..... | S3  |
| 2.2 General procedure for synthesis of products <b>3ba-3pa</b> ..... | S4  |
| 2.3 General procedure for synthesis of products <b>5a-5d</b> .....   | S5  |
| 2.4 General procedure for synthesis of products <b>7a-7d</b> .....   | S6  |
| 2.5 Spectral Data of Products.....                                   | S7  |
| 3. Synthetic Utility of the Methodology.....                         | S17 |
| 3.1 Large-scale Reaction.....                                        | S17 |
| 3.2 Sunlight-driven experiment.....                                  | S17 |
| 4. The Mechanism Studies and Spectral Data of Products.....          | S18 |
| 4.1 TEMPO trapping experiment.....                                   | S18 |
| 4.2 PhSeSePh trapping experiment.....                                | S18 |
| 6. References.....                                                   | S18 |
| 7. The Spectra of Products.....                                      | S19 |

**General Information.**

Unless otherwise noted, materials were purchased from commercial suppliers and used without further purification. All the solvents were treated according to general methods.  $^1\text{H}$  NMR were recorded on 400 MHz spectrometer. Chemical shifts ( $\delta$ ) are reported in ppm from the resonance of tetramethyl silane as the internal standard (TMS: 0.00 ppm). Data are reported as follows: chemical shift, multiplicity (s = singlet, d = doublet, t = triplet, q = quartet, m = multiplet), coupling constants (Hz) and integration.  $^{13}\text{C}$  NMR spectra were recorded on 101 MHz with complete proton decoupling spectrophotometer. Mass spectra were obtained using agilent 6520 Q-TOF electrospray ionization (ESI) mass spectrometer. Substrates 1 and 2 were synthesized according to the reported literature.<sup>1-3</sup>

## General procedure for synthesis of products **3aa-3aq**

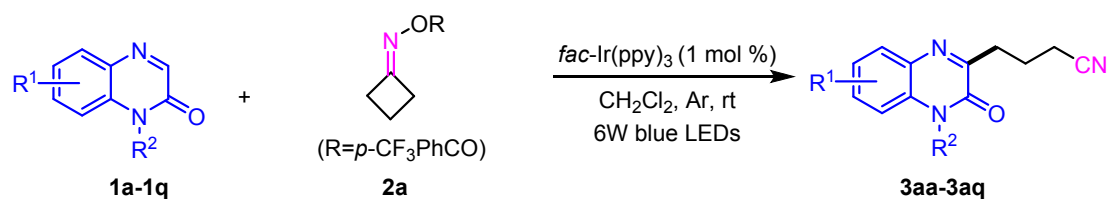

**1** (0.15 mmol), **2a** (0.1 mmol),  $fac\text{-Ir(ppy)}_3$  (1 mol %) and a magnetic stir bar were added to an oven-dried 10 mL Schlenk tube. The reaction mixture was degassed three times. 1 mL of degassed dichloromethane was then added to the mixture in the presence of a flow of argon. After that, the solution was stirred at a distance of  $\sim 5$  cm from a 6 W blue LEDs (450-460 nm) at room temperature about 10-20 h until the reaction was completed as monitored by TLC analysis. The crude product was purified by flash chromatography on silica gel (petroleum ether/ethylacetate 3:1~2:1) directly to give the desired product **3aa-3aq**.

## General procedure for synthesis of products **3ba-3pa**

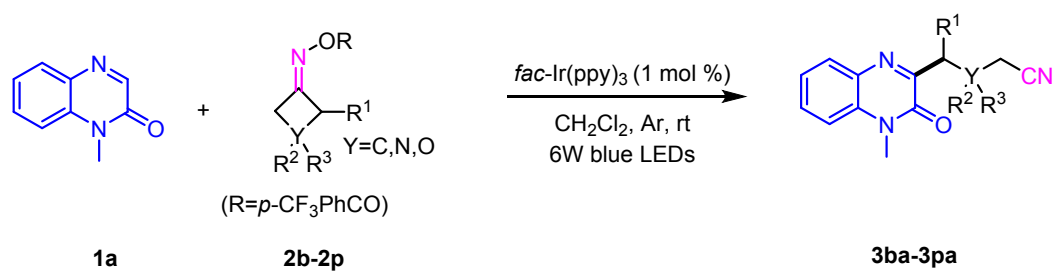

**1a** (0.15 mmol), **2** (0.1 mmol), *fac*-Ir(ppy)<sub>3</sub> (1 mol %) and a magnetic stir bar were added to an oven-dried 10 mL Schlenk tube. The reaction mixture was degassed three times. 1 mL of degassed dichloromethane was then added to the mixture in the presence of a flow of argon. After that, the solution was stirred at a distance of ~5 cm from a 6 W blue LEDs (450-460 nm) at room temperature about 10-20 h until the reaction was completed as monitored by TLC analysis. The crude product was purified by flash chromatography on silica gel (petroleum ether/ethylacetate 3:1~2:1) directly to give the desired product **3ba-3pa**.

## General procedure for synthesis of products 5a-5d

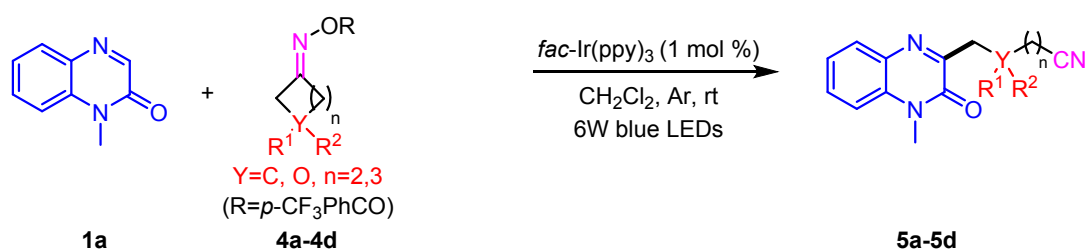

**1a** (0.15 mmol), **4** (0.1 mmol), *fac*-Ir(ppy)<sub>3</sub> (1 mol %) and a magnetic stir bar were added to an oven-dried 10 mL Schlenk tube. The reaction mixture was degassed three times. 1 mL of degassed dichloromethane was then added to the mixture in the presence of a flow of argon. After that, the solution was stirred at a distance of ~5 cm from a 6 W blue LEDs (450-460 nm) at room temperature until the reaction was completed as monitored by TLC analysis. The crude product was purified by flash chromatography on silica gel (petroleum ether/ethylacetate 5:1~2:1) directly to give the desired product **5**.

### General procedure for synthesis of products 7a-7d

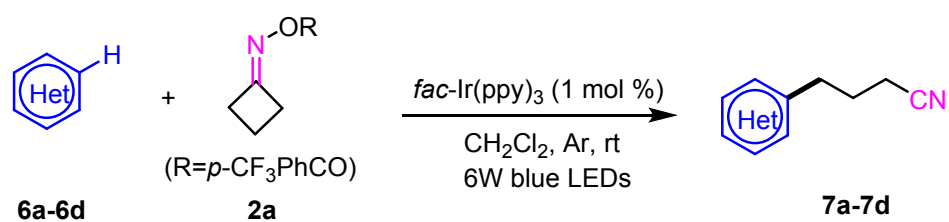

**6** (0.15 mmol), **2a** (0.1 mmol), *fac*-Ir(ppy)<sub>3</sub> (1 mol %) and a magnetic stir bar were added to an oven-dried 10 mL Schlenk tube. The reaction mixture was degassed three times. 1 mL of degassed dichloromethane was then added to the mixture in the presence of a flow of argon. After that, the solution was stirred at a distance of ~5 cm from a 6W blue LEDs (450-460 nm) at room temperature until the reaction was completed as monitored by TLC analysis. The crude product was purified by flash chromatography on silica gel (petroleum ether/ethylacetate 5:1~3:1) directly to give the desired product **7**.

## Spectral Data of Products

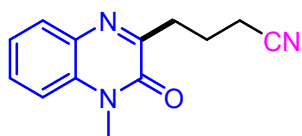

4-(4-methyl-3-oxo-3,4-dihydroquinoxalin-2-yl)butanenitrile (**3aa**) yellow solid, 22 mg, 97% yield;  $^1\text{H}$  NMR (400 MHz,  $\text{CDCl}_3$ )  $\delta$  7.82 (dd,  $J = 8.0, 1.2$  Hz, 1H), 7.57-7.53 (m, 1H), 7.37-7.30 (m, 2H), 3.70 (s, 3H), 3.08 (t,  $J = 6.8$  Hz, 2H), 2.54 (t,  $J = 7.2$  Hz, 2H), 2.22 (m, 2H);  $^{13}\text{C}$  NMR (101 MHz,  $\text{CDCl}_3$ )  $\delta$  158.5, 154.7, 133.1, 132.5, 130.1, 129.8, 123.8, 119.6, 113.6, 32.3, 29.1, 22.0, 16.8; HRMS (ESI):  $m/z$   $[\text{M} + \text{Na}]^+$  calcd for  $\text{C}_{13}\text{H}_{13}\text{N}_3\text{ONa}$ : 250.0951, found: 250.0954.

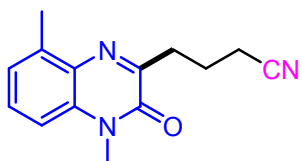

4-(4,8-dimethyl-3-oxo-3,4-dihydroquinoxalin-2-yl)butanenitrile (**3ab**) yellow solid, 21.7 mg, 94% yield;  $^1\text{H}$  NMR (400 MHz,  $\text{CDCl}_3$ )  $\delta$  7.43 (t,  $J = 7.6$  Hz, 1H), 7.21 (d,  $J = 7.2$  Hz, 1H), 7.15 (d,  $J = 8.4$  Hz, 1H), 3.69 (s, 3H), 3.10 (t,  $J = 6.8$  Hz, 2H), 2.67 (s, 3H), 2.58 (t,  $J = 7.2$  Hz, 2H), 2.25 (m, 2H);  $^{13}\text{C}$  NMR (101 MHz,  $\text{CDCl}_3$ )  $\delta$  156.4, 154.7, 138.5, 133.1, 131.0, 129.7, 125.0, 119.7, 111.6, 32.1, 29.2, 21.9, 17.5, 16.6; HRMS (ESI):  $m/z$   $[\text{M} + \text{Na}]^+$  calcd for  $\text{C}_{14}\text{H}_{15}\text{N}_3\text{ONa}$ : 264.1107, found: 264.1110.

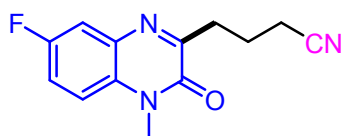

4-(7-fluoro-4-methyl-3-oxo-3,4-dihydroquinoxalin-2-yl)butanenitrile (**3ac**) yellow solid, 24.5 mg, >99% yield;  $^1\text{H}$  NMR (400 MHz,  $\text{CDCl}_3$ )  $\delta$  7.53 (dd,  $J = 8.8, 2.8$  Hz, 1H), 7.34-7.26 (m, 2H), 3.71 (s, 3H), 3.10 (t,  $J = 7.2$  Hz, 2H), 2.55 (t,  $J = 7.2$  Hz, 2H), 2.22 (m, 2H);  $^{13}\text{C}$  NMR (101 MHz,  $\text{CDCl}_3$ )  $\delta$  160.1, 158.7 (d,  $J = 244.8$  Hz), 154.4, 133.1 (d,  $J = 11.1$  Hz), 129.7 (d,  $J = 2.2$  Hz), 119.5, 117.8 (d,  $J = 23.9$  Hz), 115.3 (d,  $J = 22.7$  Hz), 114.8 (d,  $J = 8.9$  Hz), 32.4, 29.4, 21.8, 16.8; HRMS (ESI):  $m/z$   $[\text{M} + \text{Na}]^+$  calcd for  $\text{C}_{13}\text{H}_{12}\text{FN}_3\text{ONa}$ : 268.0857, found: 268.0860

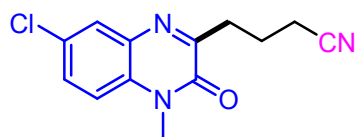

4-(7-chloro-4-methyl-3-oxo-3,4-dihydroquinoxalin-2-yl)butanenitrile (**3ad**) yellow solid, 23.8 mg, 91% yield;  $^1\text{H}$  NMR (400 MHz,  $\text{CDCl}_3$ )  $\delta$  7.83 (d,  $J = 2.4$  Hz, 1H), 7.51 (dd,  $J = 8.8, 2.4$  Hz, 1H), 7.29 (d,  $J = 3.6$  Hz, 1H), 3.71 (s, 3H), 3.11 (t,  $J = 7.2$  Hz, 2H), 2.57 (t,  $J = 7.2$  Hz, 2H), 2.24 (m, 2H);  $^{13}\text{C}$  NMR (101 MHz,  $\text{CDCl}_3$ )  $\delta$  160.0, 154.4, 133.0, 131.8, 130.0, 129.2, 129.1, 119.5, 114.8, 32.3, 29.2, 21.8, 16.7; HRMS (ESI):  $m/z$   $[\text{M} + \text{Na}]^+$  calcd for  $\text{C}_{13}\text{H}_{12}\text{ClN}_3\text{ONa}$ : 284.0561, found: 284.0565.

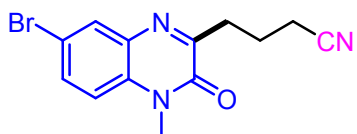

4-(7-bromo-4-methyl-3-oxo-3,4-dihydroquinoxalin-2-yl)butanenitrile (**3ae**) yellow solid, 30.5 mg, >99% yield;  $^1\text{H}$  NMR (400 MHz,  $\text{CDCl}_3$ )  $\delta$  7.67-7.65 (m, 1H), 7.46-7.43 (m, 2H), 3.66 (s, 3H), 3.05 (t,

$J = 6.8$  Hz, 2H), 2.53 (t,  $J = 7.2$  Hz, 2H), 2.20 (m, 2H);  $^{13}\text{C}$  NMR (101 MHz,  $\text{CDCl}_3$ )  $\delta$ 158.9, 154.4, 134.1, 131.3, 131.0, 127.0, 124.1, 119.5, 116.8, 32.3, 29.2, 21.9, 16.7; HRMS (ESI):  $m/z$   $[\text{M} + \text{Na}]^+$  calcd for  $\text{C}_{13}\text{H}_{12}\text{BrN}_3\text{ONa}$ : 328.0056, found:328.0060.

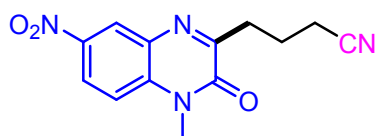

4-(4-methyl-7-nitro-3-oxo-3,4-dihydroquinoxalin-2-yl)butanenitrile (**3af**) yellow solid, 22.0mg, 81% yield;  $^1\text{H}$  NMR (400 MHz,  $\text{CDCl}_3$ )  $\delta$ 8.72 (d,  $J = 2.6$  Hz, 1H), 8.41 (dd,  $J = 9.2, 2.6$  Hz, 1H), 7.42 (d,  $J = 9.2$  Hz, 1H), 3.76 (s, 3H), 3.14 (t,  $J = 7.2$  Hz, 2H), 2.58 (t,  $J = 7.2$  Hz, 2H), 2.28-2.21 (m, 2H);  $^{13}\text{C}$  NMR (101 MHz,  $\text{CDCl}_3$ )  $\delta$ 161.3, 154.3, 143.4, 137.7, 131.6, 125.5, 124.6, 119.4, 114.3, 32.2, 29.7, 21.5, 16.7; HRMS (ESI):  $m/z$   $[\text{M} + \text{Na}]^+$  calcd for  $\text{C}_{13}\text{H}_{12}\text{N}_4\text{O}_3\text{Na}$ : 295.0802, found: 295.0804.

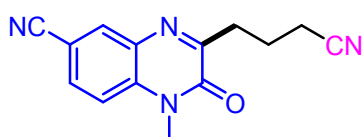

3-(3-cyanopropyl)-1-methyl-2-oxo-1,2-dihydroquinoxaline-6-carbonitrile (**3ag**) yellow solid, 21.4 mg, 84% yield;  $^1\text{H}$  NMR (400 MHz,  $\text{CDCl}_3$ )  $\delta$ 7.92-7.90 (m, 1H), 7.61-7.59 (m, 2H), 3.71 (s, 3H), 3.13 (t,  $J = 7.2$  Hz, 2H), 2.55 (t,  $J = 7.6$  Hz, 2H), 2.23 (m, 2H);  $^{13}\text{C}$  NMR (101 MHz,  $\text{CDCl}_3$ )  $\delta$ 162.2, 154.2, 134.6, 133.5, 130.8, 126.7, 119.4, 118.1, 117.9, 113.2, 32.5, 29.3, 21.7, 16.8; HRMS (ESI):  $m/z$   $[\text{M} + \text{Na}]^+$  calcd for  $\text{C}_{14}\text{H}_{15}\text{N}_3\text{O}_2\text{Na}$ : 275.0903, found:275.0906.

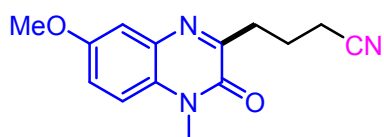

4-(7-methoxy-4-methyl-3-oxo-3,4-dihydroquinoxalin-2-yl)butanenitrile (**3ah**) yellow solid, 10.5 mg, 41% yield;  $^1\text{H}$  NMR (400 MHz,  $\text{CDCl}_3$ )  $\delta$ 7.33 (d,  $J = 2.8$  Hz, 1H), 7.29 (d,  $J = 7.6$  Hz, 1H), 7.21 (dd,  $J = 9.2, 2.8$  Hz, 1H), 3.93 (s, 3H), 3.73 (s, 3H), 3.12 (t,  $J = 7.2$  Hz, 2H), 2.58 (t,  $J = 7.3$  Hz, 2H), 2.26 (m, 2H);  $^{13}\text{C}$  NMR (101 MHz,  $\text{CDCl}_3$ )  $\delta$ 159.0, 156.0, 154.4, 133.3, 127.3, 119.6, 119.2, 114.6, 111.2, 55.8, 32.5, 29.2, 22.1, 16.7; HRMS (ESI):  $m/z$   $[\text{M} + \text{Na}]^+$  calcd for  $\text{C}_{14}\text{H}_{15}\text{N}_3\text{O}_2\text{Na}$ : 280.1056, found:280.1060.

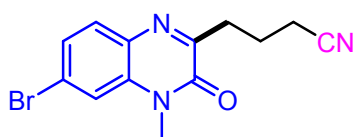

4-(6-bromo-4-methyl-3-oxo-3,4-dihydroquinoxalin-2-yl)butanenitrile (**3ai**) yellow solid, 22.6 mg, 74% yield;  $^1\text{H}$  NMR (400 MHz,  $\text{CDCl}_3$ )  $\delta$  7.68-7.66 (m, 1H), 7.47-7.44 (m, 2H), 3.66 (s, 3H), 3.06 (t,  $J = 7.2$  Hz, 2H), 2.53 (t,  $J = 7.6$  Hz, 2H), 2.21 (m, 2H);  $^{13}\text{C}$  NMR (101 MHz,  $\text{CDCl}_3$ )  $\delta$ 158.9, 154.4, 134.1, 131.3, 131.0, 127.0, 124.1, 119.5, 116.8, 32.3, 29.2, 21.9, 16.8; HRMS (ESI):  $m/z$   $[\text{M} + \text{Na}]^+$  calcd for  $\text{C}_{13}\text{H}_{12}\text{BrN}_3\text{ONa}$ : 328.0056, found:328.0058.

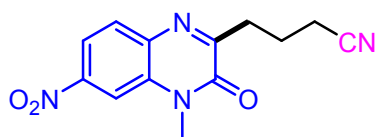



4-(4-methyl-6-nitro-3-oxo-3,4-dihydroquinoxalin-2-yl)butanenitrile (**3aj**) yellow solid, 19.3 mg, 71% yield;  $^1\text{H}$  NMR (400 MHz,  $\text{CDCl}_3$ )  $\delta$  8.25-8.20 (m, 2H), 8.00 (d,  $J = 8.8$  Hz, 1H), 3.80 (s, 3H), 3.18 (t,  $J = 7.2$  Hz, 2H), 2.59 (t,  $J = 7.2$  Hz, 2H), 2.27 (m, 2H);  $^{13}\text{C}$  NMR (101 MHz,  $\text{CDCl}_3$ )  $\delta$  162.8, 154.2, 147.7, 135.8, 133.5, 130.9, 119.3, 118.3, 109.7, 32.6, 29.6, 21.6, 16.8; HRMS (ESI):  $m/z$   $[\text{M} + \text{Na}]^+$  calcd for  $\text{C}_{13}\text{H}_{12}\text{N}_4\text{O}_3\text{Na}$ : 295.0802, found: 295.0804.

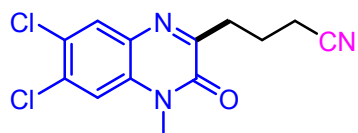

4-(6,7-dichloro-4-methyl-3-oxo-3,4-dihydroquinoxalin-2-yl)butanenitrile (**3ak**) yellow solid, 23.6 mg, 80% yield;  $^1\text{H}$  NMR (400 MHz,  $\text{CDCl}_3$ )  $\delta$  7.90 (s, 1H), 7.39 (s, 1H), 3.65 (s, 3H), 3.07 (t,  $J = 6.8$  Hz, 2H), 2.53 (t,  $J = 7.2$  Hz, 2H), 2.19 (m, 2H);  $^{13}\text{C}$  NMR (101 MHz,  $\text{CDCl}_3$ )  $\delta$  160.1, 154.1, 134.1, 132.5, 131.5, 130.6, 127.5, 119.4, 115.2, 32.3, 29.4, 21.7, 16.7; HRMS (ESI):  $m/z$   $[\text{M} + \text{Na}]^+$  calcd for  $\text{C}_{13}\text{H}_{11}\text{Cl}_2\text{N}_3\text{ONa}$ : 318.0171, found: 318.0175.

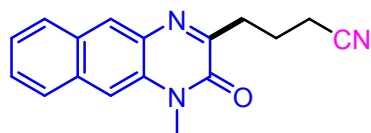

4-(4-methyl-3-oxo-3,4-dihydrobenzo[*g*]quinoxalin-2-yl)butanenitrile (**3al**) yellow solid, 27.7mg, >99% yield;  $^1\text{H}$  NMR (400 MHz,  $\text{CDCl}_3$ )  $\delta$  8.31 (s, 1H), 7.93 (dd,  $J = 26.4, 8.4$  Hz, 2H), 7.63-7.53 (m, 2H), 7.51-7.47 (m, 1H), 3.75 (s, 3H), 3.12 (t,  $J = 7.2$  Hz, 2H), 2.58 (t,  $J = 7.2$  Hz, 2H), 2.25 (m, 2H);  $^{13}\text{C}$  NMR (101 MHz,  $\text{CDCl}_3$ )  $\delta$  159.0, 154.6, 133.5, 131.8, 131.6, 129.7, 128.9, 128.4, 127.9, 127.2, 125.4, 119.6, 110.1, 32.4, 29.1, 22.0, 16.8; HRMS (ESI):  $m/z$   $[\text{M} + \text{Na}]^+$  calcd for  $\text{C}_{17}\text{H}_{15}\text{N}_3\text{ONa}$ : 300.1107, found: 300.1111.

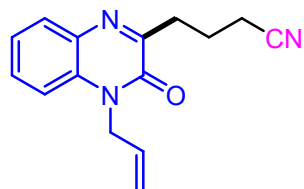

4-(4-allyl-3-oxo-3,4-dihydroquinoxalin-2-yl)butanenitrile (**3am**) yellow solid, 24.3 mg, 96% yield;  $^1\text{H}$  NMR (400 MHz,  $\text{CDCl}_3$ )  $\delta$  7.83 (dd,  $J = 8.0, 1.6$  Hz, 1H), 7.53-7.49 (m, 1H), 7.36-7.32 (m, 1H), 7.29 (dd,  $J = 8.4, 0.4$  Hz, 1H), 5.98-5.88 (m, 1H), 5.27 (dd,  $J = 10.4, 0.8$  Hz, 1H), 5.16 (dd,  $J = 17.2, 0.4$  Hz, 1H), 4.90 (dt,  $J = 5.2, 1.8$  Hz, 2H), 3.10 (t,  $J = 7.2$  Hz, 2H), 2.55 (t,  $J = 7.2$  Hz, 2H), 2.24 (m, 2H);  $^{13}\text{C}$  NMR (101 MHz,  $\text{CDCl}_3$ )  $\delta$  158.5, 154.3, 132.7, 132.3, 130.5, 130.0, 129.9, 123.7, 119.6, 118.2, 114.3, 44.5, 32.3, 22.0, 16.8; HRMS (ESI):  $m/z$   $[\text{M} + \text{Na}]^+$  calcd for  $\text{C}_{15}\text{H}_{15}\text{N}_3\text{ONa}$ : 276.1107, found: 276.1112.

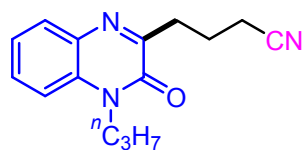

4-(3-oxo-4-propyl-3,4-dihydroquinoxalin-2-yl)butanenitrile (**3an**) yellow solid, 25.5 mg, 99% yield;  $^1\text{H}$  NMR (400 MHz,  $\text{CDCl}_3$ )  $\delta$  7.83 (dd,  $J = 7.6, 1.2$  Hz, 1H), 7.53 (ddd,  $J = 8.6, 7.3, 1.6$  Hz, 1H), 7.36-7.30 (m, 2H), 4.23-4.19 (m, 2H), 3.08 (t,  $J = 7.2$  Hz, 2H), 2.55 (t,  $J = 7.6$  Hz, 2H), 2.23 (m, 2H), 1.84-

1.74 (m, 2H), 1.05 (t,  $J = 7.6$  Hz, 3H);  $^{13}\text{C}$  NMR (101 MHz,  $\text{CDCl}_3$ )  $\delta$  158.5, 154.5, 132.8, 132.3, 130.0, 129.9, 123.5, 119.6, 113.7, 43.9, 32.3, 22.1, 20.6, 16.8, 11.4; HRMS (ESI):  $m/z$   $[\text{M} + \text{Na}]^+$  calcd for  $\text{C}_{15}\text{H}_{17}\text{N}_3\text{ONa}$ : 278.1264, found: 278.1266.

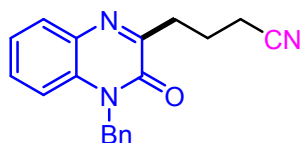

4-(4-benzyl-3-oxo-3,4-dihydroquinoxalin-2-yl)butanenitrile (**3ao**) yellow solid, 29.8 mg, 98% yield;  $^1\text{H}$  NMR (400 MHz,  $\text{CDCl}_3$ )  $\delta$  7.84 (d,  $J = 8.0$ , 1H), 7.45-7.40 (m, 1H), 7.34-7.22 (m, 7H), 5.50 (s, 2H), 3.15 (t,  $J = 7.2$  Hz, 2H), 2.58 (t,  $J = 7.6$  Hz, 2H), 2.27 (m, 2H);  $^{13}\text{C}$  NMR (101 MHz,  $\text{CDCl}_3$ )  $\delta$  158.6, 154.8, 135.1, 132.8, 132.4, 130.0, 129.9, 129.0, 127.8, 126.9, 123.8, 119.7, 114.5, 46.0, 32.4, 22.1, 16.8; HRMS (ESI):  $m/z$   $[\text{M} + \text{Na}]^+$  calcd for  $\text{C}_{19}\text{H}_{17}\text{N}_3\text{ONa}$ : 326.1264, found: 326.1268.

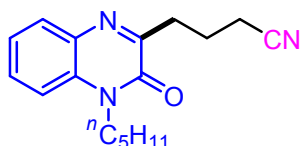

4-(3-oxo-4-pentyl-3,4-dihydroquinoxalin-2-yl)butanenitrile (**3ap**) yellow solid, 22.6 mg, 80% yield;  $^1\text{H}$  NMR (400 MHz,  $\text{CDCl}_3$ )  $\delta$  7.82 (dd,  $J = 8.0, 1.2$  Hz, 1H), 7.54 (ddd,  $J = 16.0, 7.3, 1.6$  Hz, 1H), 7.35-7.30 (m, 2H), 4.25-4.18 (m, 2H), 3.08 (t,  $J = 7.2$  Hz, 2H), 2.54 (t,  $J = 6.8$  Hz, 2H), 2.22 (m, 2H), 1.79-1.71 (m, 2H), 1.47-1.35 (m, 4H), 0.92 (t,  $J = 6.8$  Hz, 3H);  $^{13}\text{C}$  NMR (101 MHz,  $\text{CDCl}_3$ )  $\delta$  158.5, 154.4, 132.8, 132.3, 130.0, 129.9, 123.5, 119.7, 113.6, 42.4, 32.2, 29.1, 27.0, 22.4, 22.1, 16.8, 14.0; HRMS (ESI):  $m/z$   $[\text{M} + \text{Na}]^+$  calcd for  $\text{C}_{17}\text{H}_{21}\text{N}_3\text{ONa}$ : 306.1577, found: 306.1579.

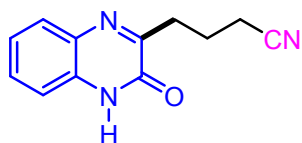

4-(3-oxo-3,4-dihydroquinoxalin-2-yl)butanenitrile (**3aq**) yellow solid, 17.0 mg, 78% yield;  $^1\text{H}$  NMR (400 MHz,  $\text{DMSO}-d_6$ )  $\delta$  12.37 (s, 1H), 7.74 (d,  $J = 7.4$  Hz, 1H), 7.50 (td,  $J = 7.7, 1.4$  Hz, 1H), 7.30 (d,  $J = 7.6$  Hz, 2H), 2.91 (t,  $J = 7.2$  Hz, 2H), 2.65 (t,  $J = 7.1$  Hz, 2H), 2.05 (m, 2H);  $^{13}\text{C}$  NMR (101 MHz,  $\text{DMSO}-d_6$ )  $\delta$  160.2, 154.6, 131.8, 131.5, 129.5, 128.1, 123.0, 120.6, 115.2, 31.3, 21.6, 15.9; HRMS (ESI):  $m/z$   $[\text{M} + \text{Na}]^+$  calcd for  $\text{C}_{12}\text{H}_{11}\text{N}_3\text{ONa}$ : 236.0794, found: 236.0797.

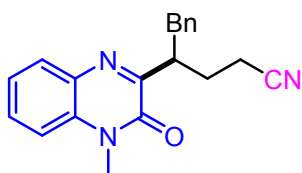

(*R*)-4-(4-methyl-3-oxo-3,4-dihydroquinoxalin-2-yl)-5-phenylpentanenitrile (**3ba**) yellow solid, 31.2 mg, 98% yield;  $^1\text{H}$  NMR (400 MHz,  $\text{CDCl}_3$ )  $\delta$  7.87-7.83 (m, 1H), 7.58-7.52 (m, 1H), 7.39-7.26 (m, 6H), 7.21-7.16 (m, 1H), 3.86-3.84 (m, 1H), 3.71 (s, 3H), 3.27-3.20 (m, 1H), 2.39-2.22 (m, 3H), 2.03-1.98 (m, 1H);  $^{13}\text{C}$  NMR (101 MHz,  $\text{CDCl}_3$ )  $\delta$  160.4, 154.6, 139.3, 133.0, 132.5, 130.3, 130.0, 129.2, 128.5, 126.4, 123.8, 119.7, 113.7, 42.6, 39.3, 29.2, 27.1, 15.1; HRMS (ESI):  $m/z$   $[\text{M} + \text{Na}]^+$  calcd for  $\text{C}_{20}\text{H}_{19}\text{N}_3\text{O}$ : 340.1420, found: 340.1425.

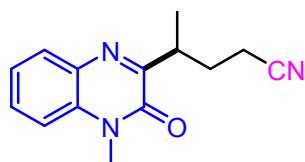

(*S*)-4-(4-methyl-3-oxo-3,4-dihydroquinoxalin-2-yl)pentanenitrile (**3ca**) yellow solid, 23.2 mg, 96% yield;  $^1\text{H}$  NMR (400 MHz,  $\text{CDCl}_3$ )  $\delta$  7.83 (dd,  $J = 8.0, 1.2$  Hz, 1H), 7.55 (ddd,  $J = 16.0, 7.3, 1.5$  Hz, 1H), 7.38-7.30 (m, 2H), 3.71 (s, 3H), 3.67-3.58 (m, 1H), 2.47-2.32 (m, 3H), 2.04-1.94 (m, 1H), 1.32 (d,  $J = 7.2$  Hz, 3H);  $^{13}\text{C}$  NMR (101 MHz,  $\text{CDCl}_3$ )  $\delta$  161.8, 154.5, 133.0, 132.5, 130.1, 130.0, 123.7, 119.8, 113.7, 35.5, 29.6, 29.2, 18.5, 15.2; HRMS (ESI):  $m/z$   $[\text{M} + \text{H}]^+$  calcd for  $\text{C}_{14}\text{H}_{15}\text{N}_3\text{O}$ : 242.1288, found: 242.1290.

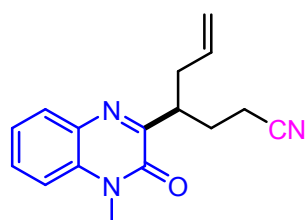

(*R*)-4-(4-methyl-3-oxo-3,4-dihydroquinoxalin-2-yl)hept-6-enenitrile (**3da**) yellow oil, 20.8 mg, 78% yield;  $^1\text{H}$  NMR (400 MHz,  $\text{CDCl}_3$ )  $\delta$  7.84 (dd,  $J = 8.0, 1.2$  Hz, 1H), 7.56 (ddd,  $J = 16.0, 7.3, 1.6$  Hz, 1H), 7.38-7.33 (m, 2H), 5.83-5.75 (m, 1H), 5.08-4.99 (m, 2H), 3.71 (s, 3H), 3.69-3.62 (m, 1H), 2.66-2.58 (m, 1H), 2.41-2.30 (m, 4H), 2.13-2.04 (m, 1H);  $^{13}\text{C}$  NMR (101 MHz,  $\text{CDCl}_3$ )  $\delta$  160.5, 154.6, 135.4, 132.9, 132.5, 130.2, 130.0, 123.7, 119.8, 117.4, 113.7, 40.2, 37.3, 29.3, 27.4, 15.1; HRMS (EI):  $m/z$   $[\text{M} + \text{Na}]^+$  calcd for  $\text{C}_{16}\text{H}_{17}\text{N}_3\text{O}$ : 290.1264, found: 290.1266.

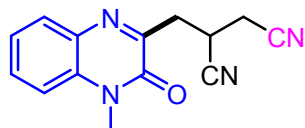

2-((4-methyl-3-oxo-3,4-dihydroquinoxalin-2-yl)methyl)succinonitrile (**3ea**) yellow solid, 22.2 mg, 87% yield;  $^1\text{H}$  NMR (400 MHz,  $\text{CDCl}_3$ )  $\delta$  7.87 (d,  $J = 8.0$ , 1H), 7.61 (t,  $J = 7.6$ , 1H), 7.41-7.34 (m, 2H), 3.81 (m, 1H), 3.72 (s, 3H), 3.51-3.34 (m, 2H), 2.97 (d,  $J = 6.8$  Hz, 1H);  $^{13}\text{C}$  NMR (101 MHz,  $\text{CDCl}_3$ )  $\delta$  154.3, 153.8, 133.2, 132.1, 131.0, 130.1, 124.1, 118.9, 115.7, 113.9, 34.7, 29.3, 25.1, 20.7; HRMS (ESI):  $m/z$   $[\text{M} + \text{H}]^+$  calcd for  $\text{C}_{14}\text{H}_{13}\text{N}_4\text{O}$ : 253.1084, found: 253.1087.

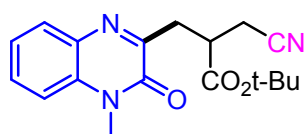

*tert*-butyl 3-cyano-2-((4-methyl-3-oxo-3,4-dihydroquinoxalin-2-yl)methyl)propanoate (**3fa**) yellow solid, 26.8 mg, 82% yield;  $^1\text{H}$  NMR (400 MHz,  $\text{CDCl}_3$ )  $\delta$  7.78 (dd,  $J = 8.0, 1.2$  Hz, 1H), 7.55 (ddd,  $J = 8.5, 7.2, 1.2$  Hz, 1H), 7.36-7.31 (m, 2H), 3.70 (s, 3H), 3.44-3.38 (m, 2H), 3.30-3.23 (m, 1H), 2.88-2.74 (m, 2H), 1.41 (s, 9H);  $^{13}\text{C}$  NMR (101 MHz,  $\text{CDCl}_3$ )  $\delta$  171.1, 156.7, 154.6, 133.1, 132.2, 130.2, 129.7, 123.8, 118.0, 113.7, 81.9, 39.3, 34.5, 29.1, 27.9, 19.2; HRMS (ESI):  $m/z$   $[\text{M} + \text{Na}]^+$  calcd for  $\text{C}_{18}\text{H}_{21}\text{N}_3\text{O}_3\text{Na}$ : 350.1475, found: 350.1478.

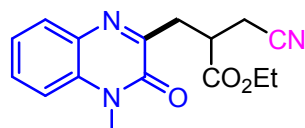

ethyl 3-cyano-2-((4-methyl-3-oxo-3,4-dihydroquinoxalin-2-yl)methyl)propanoate (**3ga**) brown solid, 26.3 mg, 88% yield; <sup>1</sup>H NMR (400 MHz, CDCl<sub>3</sub>) δ 7.77 (dd, *J* = 8.0, 1.2 Hz, 1H), 7.56 (ddd, *J* = 16.0, 7.3, 1.6 Hz, 1H), 7.36-7.31 (m, 2H), 4.19 (q, *J* = 7.2 Hz, 2H), 3.70 (s, 3H), 3.51-3.45 (m, 2H), 3.31 (dd, *J* = 19.2, 8.8 Hz, 1H), 2.93-2.80 (m, 2H), 1.22 (t, *J* = 7.2 Hz, 3H); <sup>13</sup>C NMR (101 MHz, CDCl<sub>3</sub>) δ 172.0, 156.4, 154.6, 133.1, 132.2, 130.3, 129.8, 123.8, 117.9, 113.7, 61.5, 38.5, 34.3, 29.1, 19.1, 14.1; HRMS (ESI): *m/z* [M + H]<sup>+</sup> calcd for C<sub>16</sub>H<sub>18</sub>N<sub>3</sub>O<sub>3</sub>: 300.1343, found:300.1345.

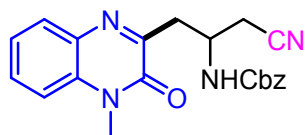

benzyl (1-cyano-3-(4-methyl-3-oxo-3,4-dihydroquinoxalin-2-yl)propan-2-yl)carbamate (**3ha**) yellow solid, 34.1 mg, 91% yield; <sup>1</sup>H NMR (400 MHz, CDCl<sub>3</sub>) δ 7.81 (d, *J* = 8.0 Hz, 1H), 7.60-7.56 (m, 1H), 7.39-7.26 (m, 7H), 6.06 (d, *J* = 7.2 Hz, 1H), 5.05 (s, 2H), 4.53-4.46 (m, 1H), 3.68 (s, 3H), 3.38-3.25 (m, 2H), 2.99-2.83 (m, 2H); <sup>13</sup>C NMR (101 MHz, CDCl<sub>3</sub>) δ 156.1, 155.7, 155.2, 136.2, 133.1, 132.4, 130.6, 130.0, 128.5, 128.2, 128.1, 124.0, 117.2, 113.8, 66.9, 46.7, 37.0, 29.3, 23.4; HRMS (ESI): *m/z* [M + Na]<sup>+</sup> calcd for C<sub>21</sub>H<sub>20</sub>N<sub>4</sub>O<sub>3</sub>Na: 399.1428, found:399.1431.

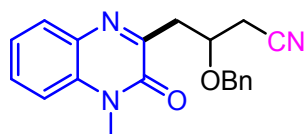

3-(benzyloxy)-4-(4-methyl-3-oxo-3,4-dihydroquinoxalin-2-yl)butanenitrile (**3ia**) brown oil, 16.7 mg, 50% yield; <sup>1</sup>H NMR (400 MHz, CDCl<sub>3</sub>) δ 7.83 (dd, *J* = 8.0, 1.2 Hz, 1H), 7.57 (ddd, *J* = 15.6, 8.4, 1.6 Hz, 1H), 7.39-7.35 (m, 1H), 7.31-7.26 (m, 3H), 7.22-7.19 (m, 3H), 4.73-4.66 (m, 2H), 4.43-4.40 (m, 1H), 3.65 (s, 3H), 3.42 (dd, *J* = 15.2, 6.4 Hz, 1H), 3.18 (dd, *J* = 15.2, 6.5 Hz, 1H), 2.78 (qd, *J* = 16.8, 4.8 Hz, 2H); <sup>13</sup>C NMR (101 MHz, CDCl<sub>3</sub>) δ 156.4, 154.7, 137.4, 133.2, 132.5, 130.3, 130.0, 128.3, 128.1, 127.8, 123.8, 117.7, 113.7, 72.4, 72.1, 38.6, 29.1, 23.7; HRMS (ESI): *m/z* [M + Na]<sup>+</sup> calcd for C<sub>20</sub>H<sub>19</sub>N<sub>3</sub>O<sub>2</sub>Na: 356.1369, found:356.1375.

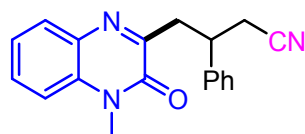

4-(4-methyl-3-oxo-3,4-dihydroquinoxalin-2-yl)-3-phenylbutanenitrile (**3ja**) yellow solid, 16.7 mg, 60% yield; <sup>1</sup>H NMR (400 MHz, CDCl<sub>3</sub>) δ 7.83 (dd, *J* = 8.0, 1.2 Hz, 1H), 7.57-7.53 (m, 1H), 7.40-7.29 (m, 6H), 7.27-7.23 (m, 1H), 3.92-3.85 (m, 1H), 3.69 (s, 3H), 3.48-3.34 (m, 2H), 2.88-2.75 (m, 2H); <sup>13</sup>C NMR (101 MHz, CDCl<sub>3</sub>) δ 157.4, 154.8, 141.6, 133.1, 132.5, 130.2, 129.9, 128.9, 127.5, 127.4, 123.8, 118.5, 113.7, 38.9, 38.6, 29.7, 29.2, 24.3; HRMS (ESI): *m/z* [M + H]<sup>+</sup> calcd for C<sub>19</sub>H<sub>18</sub>N<sub>3</sub>O: 304.1444, found:304.1448.

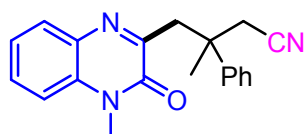

3-methyl-4-(4-methyl-3-oxo-3,4-dihydroquinoxalin-2-yl)-3-phenylbutanenitrile (**3ka**) yellow solid, 19.2 mg, 60% yield; <sup>1</sup>H NMR (400 MHz, CDCl<sub>3</sub>) δ 7.75 (dd, *J* = 7.6, 1.2 Hz, 1H), 7.56-7.51 (m, 1H), 7.44-7.41 (m, 2H), 7.35-7.26 (m, 4H), 7.25-7.20 (m, 1H), 3.64 (s, 3H), 3.52-3.37 (m, 2H), 3.25-3.10

(m, 2H), 1.69 (s, 3H);  $^{13}\text{C}$  NMR (101 MHz,  $\text{CDCl}_3$ )  $\delta$  157.3, 155.1, 144.6, 133.0, 132.2, 130.3, 129.9, 128.5, 126.9, 125.6, 123.7, 118.6, 113.6, 42.9, 41.1, 29.6, 29.3, 26.0; HRMS (ESI):  $m/z$   $[\text{M} + \text{H}]^+$  calcd for  $\text{C}_{20}\text{H}_{20}\text{N}_3\text{O}$ : 318.1601, found:318.1605.

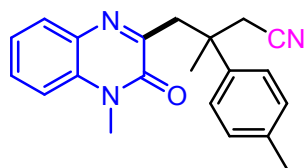

*3-methyl-4-(4-methyl-3-oxo-3,4-dihydroquinoxalin-2-yl)-3-(p-tolyl)butanenitrile (31a)* yellow oil, 23.2 mg, 60% yield;  $^1\text{H}$  NMR (400 MHz,  $\text{CDCl}_3$ )  $\delta$  7.77 (dd,  $J = 7.6, 0.8$  Hz, 1H), 7.56-7.52 (m, 1H), 7.35-7.28 (m, 4H), 7.13 (d,  $J = 8.0$  Hz, 2H), 3.65 (s, 3H), 3.50-3.36 (m, 2H), 3.22-3.08 (m, 2H), 2.30 (s, 3H);  $^{13}\text{C}$  NMR (101 MHz,  $\text{CDCl}_3$ )  $\delta$  157.5, 155.2, 141.8, 136.5, 133.0, 132.3, 130.2, 130.0, 129.2, 125.5, 123.7, 118.7, 113.6, 42.9, 40.8, 29.6, 29.3, 26.0, 20.9; HRMS (ESI):  $m/z$   $[\text{M} + \text{Na}]^+$  calcd for  $\text{C}_{21}\text{H}_{21}\text{N}_3\text{ONa}$ : 354.1577, found:354.1581.

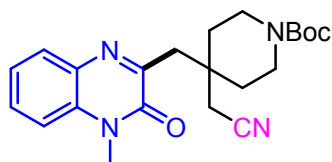

*tert-butyl 4-(cyanomethyl)-4-((4-methyl-3-oxo-3,4-dihydroquinoxalin-2-yl)methyl)piperidine-1-carboxylate (3ma)* yellow oil, 26.6 mg, 67% yield;  $^1\text{H}$  NMR (400 MHz,  $\text{CDCl}_3$ )  $\delta$  7.82 (dd,  $J = 8.0, 1.2$  Hz, 1H), 7.57 (ddd,  $J = 16.0, 7.2, 1.6$  Hz, 1H), 7.38-7.30 (m, 2H), 3.71 (s, 3H), 3.63-3.50 (m, 4H), 3.19 (s, 2H), 2.78 (s, 2H), 1.77-1.72 (m, 2H), 1.67-1.61 (m, 2H), 1.45 (s, 9H);  $^{13}\text{C}$  NMR (101 MHz,  $\text{CDCl}_3$ )  $\delta$  157.2, 147.3, 133.0, 132.3, 130.9, 130.5, 130.0, 128.8, 123.8, 113.7, 79.7, 38.7, 37.7, 36.0, 34.4, 29.4, 28.4, 26.9; HRMS (ESI):  $m/z$   $[\text{M} + \text{H}]^+$  calcd for  $\text{C}_{22}\text{H}_{29}\text{N}_4\text{O}_3$ : 397.2234, found: 397.2237.

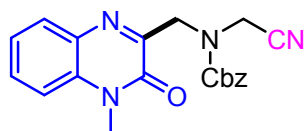

*benzyl (cyanomethyl)((4-methyl-3-oxo-3,4-dihydroquinoxalin-2-yl)methyl)carbamate (3na)* yellow solid, 33.5 mg, 93% yield;  $^1\text{H}$  NMR (400 MHz,  $\text{CDCl}_3$ )  $\delta$  7.84-7.81 (m, 1H), 7.62-7.56 (m, 1H), 7.45-7.32 (m, 4H), 7.20 (d,  $J = 0.8$  Hz, 3H), 5.27-5.15 (m, 2H), 4.88-4.85 (m, 2H), 4.54-4.43 (m, 2H), 3.70 (s, 3H);  $^{13}\text{C}$  NMR (101 MHz,  $\text{CDCl}_3$ )  $\delta$  156.1, 153.4, 135.8, 133.1, 132.2, 130.7, 130.3, 128.6, 128.4, 128.1, 127.8, 124.0, 115.7, 113.7, 68.1, 49.3, 37.0, 28.9; HRMS (ESI):  $m/z$   $[\text{M} + \text{Na}]^+$  calcd for  $\text{C}_{20}\text{H}_{18}\text{N}_4\text{O}_3\text{Na}$ : 385.1271, found:385.1275.

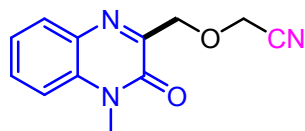

*2-((4-methyl-3-oxo-3,4-dihydroquinoxalin-2-yl)methoxy)acetonitrile (3oa)* yellow solid, 19.9 mg, 87% yield;  $^1\text{H}$  NMR (400 MHz,  $\text{CDCl}_3$ )  $\delta$  7.96 (dd,  $J = 8.0, 0.4$  Hz, 1H), 7.64-7.60 (m, 1H), 7.42-7.35 (m, 2H), 4.97 (s, 2H), 4.59 (s, 2H), 3.73 (s, 3H);  $^{13}\text{C}$  NMR (101 MHz,  $\text{CDCl}_3$ )  $\delta$  154.1, 153.9, 133.2, 132.4, 131.0, 130.5, 124.1, 115.8, 113.8, 70.0, 56.6, 29.0; HRMS (ESI):  $m/z$   $[\text{M} + \text{H}]^+$  calcd for  $\text{C}_{12}\text{H}_{12}\text{N}_3\text{O}_2$ : 230.0924, found:230.0927.

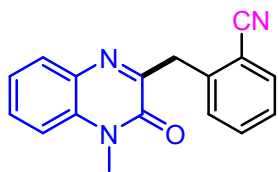

2-((4-methyl-3-oxo-3,4-dihydroquinoxalin-2-yl)methyl)benzonitrile (**3pa**) white solid, 20.6 mg, 75% yield;  $^1\text{H NMR}$  (400 MHz,  $\text{CDCl}_3$ )  $\delta$  7.78 (d,  $J = 7.6$  Hz, 1H), 7.69 (d,  $J = 7.6$  Hz, 1H), 7.56-7.49 (m, 2H), 7.44-7.43 (m, 1H), 7.37-7.29 (m, 3H), 4.51 (s, 2H), 3.70 (s, 3H);  $^{13}\text{C NMR}$  (101 MHz,  $\text{CDCl}_3$ )  $\delta$  157.3, 154.5, 140.9, 133.3, 133.0, 132.6, 132.6, 130.5, 130.3, 130.2, 127.1, 123.7, 118.2, 113.9, 113.6, 39.0, 29.2; HRMS (ESI):  $m/z$   $[\text{M} + \text{H}]^+$  calcd for  $\text{C}_{17}\text{H}_{14}\text{N}_3\text{O}$ : 276.1131, found: 276.1135.

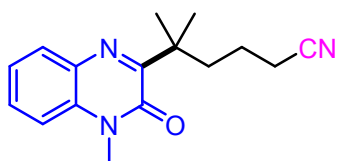

5-methyl-5-(4-methyl-3-oxo-3,4-dihydroquinoxalin-2-

yl)hexanenitrile (**5a**) colorless oil, 24.2 mg, 90% yield;  $^1\text{H NMR}$  (400 MHz,  $\text{CDCl}_3$ )  $\delta$  7.88-7.86 (m, 1H), 7.58-7.53 (m, 1H), 7.38-7.29 (m, 2H), 3.71 (s, 3H), 2.34 (td,  $J = 7.2, 1.8$  Hz, 2H), 2.18-2.13 (m, 2H), 1.62-1.54 (m, 2H), 1.50 (s, 6H);  $^{13}\text{C NMR}$  (101 MHz,  $\text{CDCl}_3$ )  $\delta$  163.5, 153.7, 133.2, 132.1, 130.2, 130.0, 123.4, 119.8, 113.4, 42.5, 39.3, 28.9, 26.1, 21.6, 17.7; HRMS (ESI):  $m/z$   $[\text{M} + \text{Na}]^+$  calcd for  $\text{C}_{16}\text{H}_{19}\text{N}_3\text{ONa}$ : 292.1420, found: 292.1426.

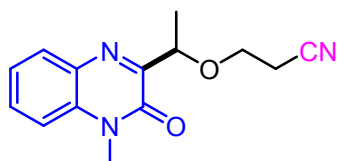

(*R*)-3-(1-(4-methyl-3-oxo-3,4-dihydroquinoxalin-2-yl)ethoxy)propanenitrile (**5b**) yellow oil, 24.2mg, 96% yield;  $^1\text{H NMR}$  (400 MHz,  $\text{CDCl}_3$ )  $\delta$  7.96 (dd,  $J = 8.0, 1.2$  Hz, 1H), 7.59 (ddd,  $J = 8.5, 7.2, 1.2$  Hz, 1H), 7.40-7.32 (m, 2H), 5.14 (q,  $J = 6.5$  Hz, 1H), 3.89-3.84 (m, 1H), 3.76-3.73 (m, 1H), 3.71 (s, 3H), 2.69 (td,  $J = 6.6, 3.2$  Hz, 2H), 1.58 (d,  $J = 6.5$  Hz, 3H);  $^{13}\text{C NMR}$  (101 MHz,  $\text{CDCl}_3$ )  $\delta$  158.6, 154.2, 133.2, 132.5, 130.7, 130.5, 123.9, 117.8, 113.7, 74.4, 64.5, 29.0, 19.0; HRMS (ESI):  $m/z$   $[\text{M} + \text{H}]^+$  calcd for  $\text{C}_{14}\text{H}_{16}\text{N}_3\text{O}_2$ : 258.1237, found: 258.1240.

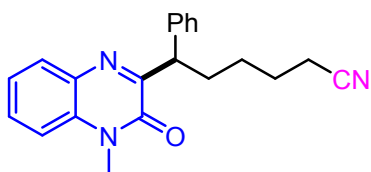

(*R*)-6-(4-methyl-3-oxo-3,4-dihydroquinoxalin-2-yl)-6-phenylhexanenitrile (**5c**) yellow solid, 15.2mg, 46% yield;  $^1\text{H NMR}$  (400 MHz,  $\text{CDCl}_3$ )  $\delta$  7.93 (dd,  $J = 8.0, 0.8$  Hz, 1H), 7.55-7.51 (m, 1H), 7.45-7.43 (m, 2H), 7.38-7.34 (m, 1H), 7.30-7.25 (m, 3H), 7.21-7.17 (m, 1H), 4.67 (t,  $J = 7.6$  Hz, 1H), 3.63 (s, 3H), 2.38-2.29 (m, 3H), 2.13-2.04 (m, 1H), 1.75-1.67 (m, 2H), 1.53-1.39 (m, 2H);  $^{13}\text{C NMR}$  (101 MHz,  $\text{CDCl}_3$ )  $\delta$  160.7, 154.5, 141.1, 133.0, 132.7, 130.1, 129.9, 128.6, 128.5, 126.8, 123.5, 119.7, 113.5; HRMS (ESI):  $m/z$   $[\text{M} + \text{Na}]^+$  calcd for  $\text{C}_{21}\text{H}_{21}\text{N}_3\text{ONa}$ : 354.1577, found: 354.1580.

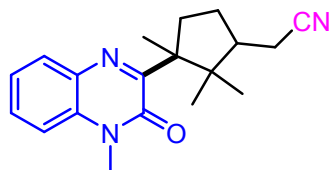

2-((3S)-2,2,3-trimethyl-3-(4-methyl-3-oxo-3,4-dihydroquinoxalin-2-yl)cyclopentyl)acetonitrile (**5d**) colorless oil, 13.2mg, 43% yield;  $^1\text{H}$  NMR (400 MHz,  $\text{CDCl}_3$ )  $\delta$  7.87(dd,  $J = 8.0, 1.5$  Hz, 1H), 7.56-7.52 (m, 1H), 7.37-7.27 (m, 2H), 3.70 (s, 3H), 3.37 (dd,  $J = 13.1, 6.5$  Hz, 1H), 2.45 (d,  $J = 14.2$  Hz, 1H), 2.39-2.22 (m, 2H), 2.00-1.95 (m, 1H), 1.93-1.90 (m, 2H), 1.58 (s, 3H), 1.02 (d,  $J = 2.8$  Hz, 6H);  $^{13}\text{C}$  NMR (101 MHz,  $\text{CDCl}_3$ )  $\delta$  163.6, 153.8, 133.3, 131.8, 130.2, 129.8, 123.4, 119.8, 113.4, 53.5, 47.0, 45.3, 42.4, 41.0, 28.9, 28.8, 27.8, 23.8, 17.3; HRMS (ESI):  $m/z$   $[\text{M} + \text{H}]^+$  calcd for  $\text{C}_{19}\text{H}_{24}\text{N}_3\text{O}$ : 310.1914, found: 310.1914.

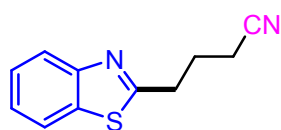

4-(benzo[d]thiazol-2-yl)butanenitrile (**7a**) colorless oil, 8.0mg, 40% yield;  $^1\text{H}$  NMR (400 MHz,  $\text{CDCl}_3$ )  $\delta$  7.98 (d,  $J = 8.0$  Hz, 1H), 7.86 (d,  $J = 8.1$  Hz, 1H), 7.50-7.46 (m, 1H), 7.41-7.36 (m, 1H), 3.28 (t,  $J = 7.2$  Hz, 2H), 2.56 (t,  $J = 7.2$  Hz, 2H), 2.33-2.26 (m, 2H);  $^{13}\text{C}$  NMR (101 MHz,  $\text{CDCl}_3$ )  $\delta$  168.8, 153.2, 135.0, 126.2, 125.1, 122.7, 121.6, 119.0, 32.5, 24.8, 16.6; HRMS (ESI):  $m/z$   $[\text{M} + \text{H}]^+$  calcd for  $\text{C}_{11}\text{H}_{11}\text{N}_2\text{S}$ : 203.0637, found: 203.0640.

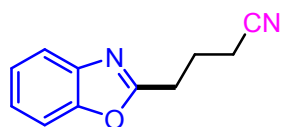

4-(benzo[d]oxazol-2-yl)butanenitrile (**7b**) colorless oil, 5.5mg, 30% yield,  $^1\text{H}$  NMR (400 MHz,  $\text{CDCl}_3$ )  $\delta$  7.69-7.65 (m, 1H), 7.52-7.48 (m, 1H), 7.35-7.31 (m, 2H), 3.12 (t,  $J = 7.2$  Hz, 2H), 2.60 (t,  $J = 7.2$  Hz, 2H), 2.29 (m, 2H);  $^{13}\text{C}$  NMR (101 MHz,  $\text{CDCl}_3$ )  $\delta$  164.7, 150.8, 141.1, 124.9, 124.4, 119.8, 118.8, 110.5, 27.1, 22.4, 16.6; HRMS (ESI):  $m/z$   $[\text{M} + \text{H}]^+$  calcd for  $\text{C}_{11}\text{H}_{11}\text{N}_2\text{O}$ : 187.0866, found: 187.0863.

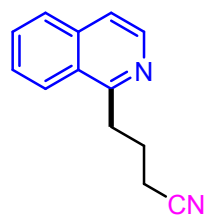

4-(isoquinolin-1-yl)butanenitrile (**7c**) yellow oil, 7.1mg, 36%  $^1\text{H}$  NMR (400 MHz,  $\text{CDCl}_3$ ) 8.45 (d,  $J = 5.6$  Hz, 1H), 8.17 (d,  $J = 8.4$  Hz, 1H), 7.85 (d,  $J = 8.0$  Hz, 1H), 7.74-7.70 (m, 1H), 7.67-7.63 (m, 1H), 7.58 (d,  $J = 5.6$  Hz, 1H), 3.49 (t,  $J = 7.2$  Hz, 2H), 2.55 (t,  $J = 6.8$  Hz, 2H), 2.31 (m, 2H);  $^{13}\text{C}$  NMR (101 MHz,  $\text{CDCl}_3$ )  $\delta$  159.1, 141.2, 136.4, 130.4, 127.7, 127.6, 127.0, 124.8, 120.0, 119.7, 32.8, 24.4, 17.0; HRMS (ESI):  $m/z$   $[\text{M} + \text{H}]^+$  calcd for  $\text{C}_{13}\text{H}_{13}\text{N}_2$ : 197.1073, found: 197.1073.

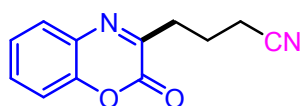

4-(2-oxo-2H-benzo[b][1,4]oxazin-3-yl)butanenitrile (**7d**) yellow solid, 14.4 mg, 67% yield;  $^1\text{H}$  NMR

(400 MHz, CDCl<sub>3</sub>) δ 7.74 (dd, *J* = 8.0, 1.2 Hz, 1H), 7.50 (ddd, *J* = 16.0, 7.5, 1.2 Hz, 1H), 7.37 (td, *J* = 7.6, 1.2 Hz, 1H), 7.30 (dd, *J* = 8.0, 0.8 Hz, 1H), 3.06 (t, *J* = 7.2 Hz, 2H), 2.56 (t, *J* = 7.2 Hz, 2H), 2.22 (m, 2H); <sup>13</sup>C NMR (101 MHz, CDCl<sub>3</sub>) δ 155.5, 152.8, 146.3, 131.0, 130.9, 128.9, 125.6, 119.2, 116.5, 32.2, 21.6, 16.7; HRMS (ESI): *m/z* [M + H]<sup>+</sup> calcd for C<sub>12</sub>H<sub>11</sub>N<sub>2</sub>O<sub>2</sub>: 215.0815, found:215.0818.



## Synthetic Utility of the Methodology

### Large-scale Reaction

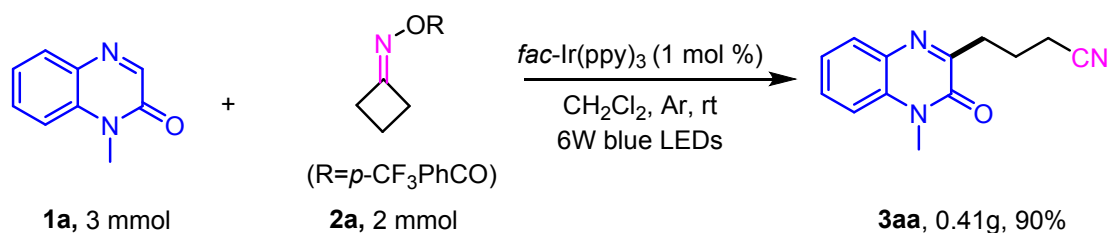

**1a** (3 mmol), **2a** (2 mmol), *fac*-Ir(ppy)<sub>3</sub> (1 mol %) and a magnetic stir bar were added to an oven-dried 50 mL Schlenk tube. The reaction mixture was degassed three times. 20 mL of degassed dichloromethane was then added to the mixture in the presence of a flow of argon. After that, the solution was stirred at a distance of ~5 cm from a 6 W blue LEDs (450-460 nm) at room temperature about 20 h until the reaction was completed as monitored by TLC analysis. The crude product was purified by flash chromatography on silica gel (petroleum ether/ethylacetate 3:1~2:1) directly to give the desired product **3aa**.

### Sunlight-driven experiment

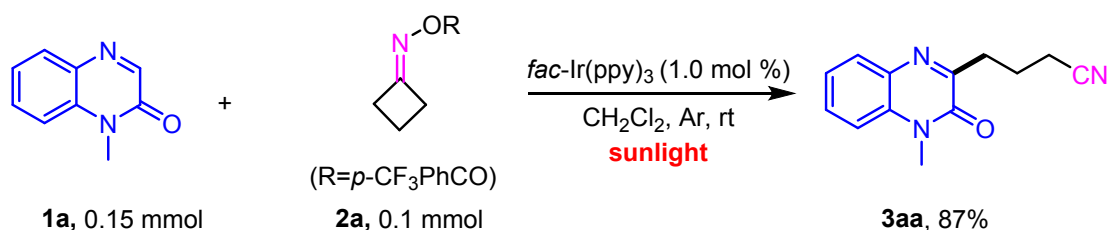

**1a** (0.15 mmol), **2a** (0.15 mmol), *fac*-Ir(ppy)<sub>3</sub> (1 mol %) and a magnetic stir bar were added to an oven-dried 10 mL Schlenk tube. The reaction mixture was degassed three times. 1 mL of degassed dichloromethane was then added to the mixture in the presence of a flow of argon. The solution was stirred under solar light for a day (Location: 39°6'2" N, 117°9'51" E). Afterward, the crude mixture was purified by column chromatography (eluent: petroleum ether/ethyl acetate 2:1) to give the product **3aa** in 87% yield as a yellow solid.

## The Mechanism Studies and Spectral Data of Products

### TEMPO trapping experiment

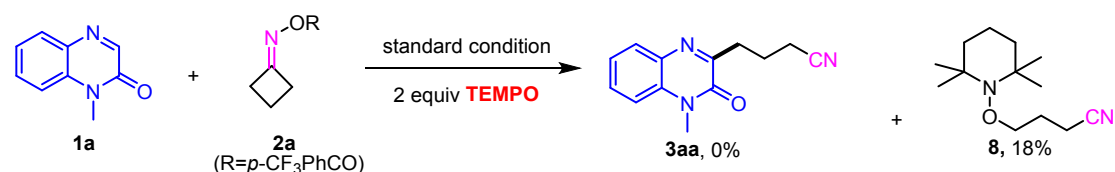

**1** (0.15 mmol), **2a** (0.1 mmol), *fac*-Ir(ppy)<sub>3</sub> (1 mol %) and a magnetic stir bar were added to an oven-dried 10 mL Schlenk tube. The reaction mixture was degassed three times. 1 mL of degassed dichloromethane was then added to the mixture in the presence of a flow of argon. After that, the solution was stirred at a distance of ~5 cm from a 6 W blue LEDs (450-460 nm) at room temperature about 15 h until the reaction was completed as monitored by TLC analysis. The crude product was purified by flash chromatography on silica gel (petroleum ether/ethylacetate 20:1) directly to give the desired product **8**.

**4-((2,2,6,6-tetramethylpiperidin-1-yl)oxy)butanenitrile (8)** colorless oil 4mg, 18% yield; <sup>1</sup>H NMR (400 MHz, CDCl<sub>3</sub>) δ 3.84 (t, *J* = 6.0 Hz, 2H), 2.49 (t, *J* = 7.2 Hz, 2H), 1.92-1.87 (m, 2H), 1.46-1.43 (m, 6H), 1.15 (s, 3H), 1.09 (s, 3H); <sup>13</sup>C NMR (101 MHz, CDCl<sub>3</sub>) δ 119.8, 73.6, 59.8, 39.6, 33.1, 25.1, 20.1, 17.1, 4.5; HRMS (ESI): *m/z* [M + H]<sup>+</sup> calcd for C<sub>13</sub>H<sub>25</sub>N<sub>2</sub>O: 225.1961, found:225.1965.

### PhSeSePh trapping experiment

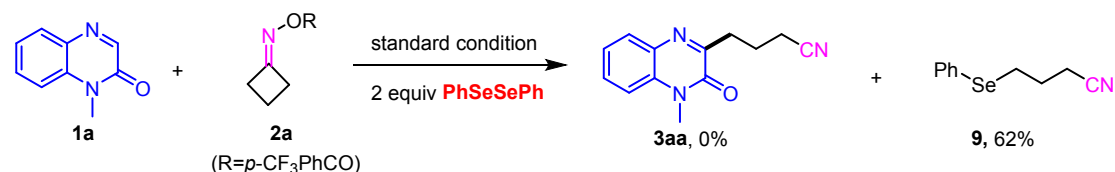

**1** (0.15 mmol), **2a** (0.1 mmol), *fac*-Ir(ppy)<sub>3</sub> (1 mol %) and a magnetic stir bar were added to an oven-dried 10 mL Schlenk tube. The reaction mixture was degassed three times. 1 mL of degassed dichloromethane was then added to the mixture in the presence of a flow of argon. After that, the solution was stirred at a distance of ~5 cm from a 6 W blue LEDs (450-460 nm) at room temperature about 15 h until the reaction was completed as monitored by TLC analysis. The crude product was purified by flash chromatography on silica gel (petroleum ether/ethylacetate 20:1) directly to give the desired product **9**.

**4-(phenylselanyl)butanenitrile (9)** colorless oil, 13.9mg, 62% yield; <sup>1</sup>H NMR (400 MHz, CDCl<sub>3</sub>) δ 7.46-7.42(m,2H), 7.25-7.19(m, 3H), 2.92 (t, *J* = 6.8 Hz, 2H), 2.43 (t, *J* = 7.2 Hz, 2H), 1.92 (p, *J* = 6.8 Hz, 2H); <sup>13</sup>C NMR (101 MHz, CDCl<sub>3</sub>) δ 132.2, 128.3, 127.7, 126.5, 118.0, 25.0, 24.7, 16.0; HRMS (ESI): *m/z* [M + Na]<sup>+</sup> calcd for C<sub>10</sub>H<sub>11</sub>NNaSe: 247.9949, found: 247.9949.

### Reference:

1. L. Yang, P. Gao, X.-H. Duan, Y.-R. Gu and L.-N. Guo, *Org. Lett.*, 2018, **20**, 1034.
2. B. Zhao and Z. Shi, *Angew. Chem. Int. Ed.*, 2017, **56**, 12727.
3. X.-Y. Yu, J.-R. Chen, P.-Z. Wang, M.-N. Yang, D. Liang and W.-J. Xiao, *Angew. Chem. Int. Ed.*, 2018, **57**, 738.

### <sup>1</sup>H NMR Spectrum of **3aa**

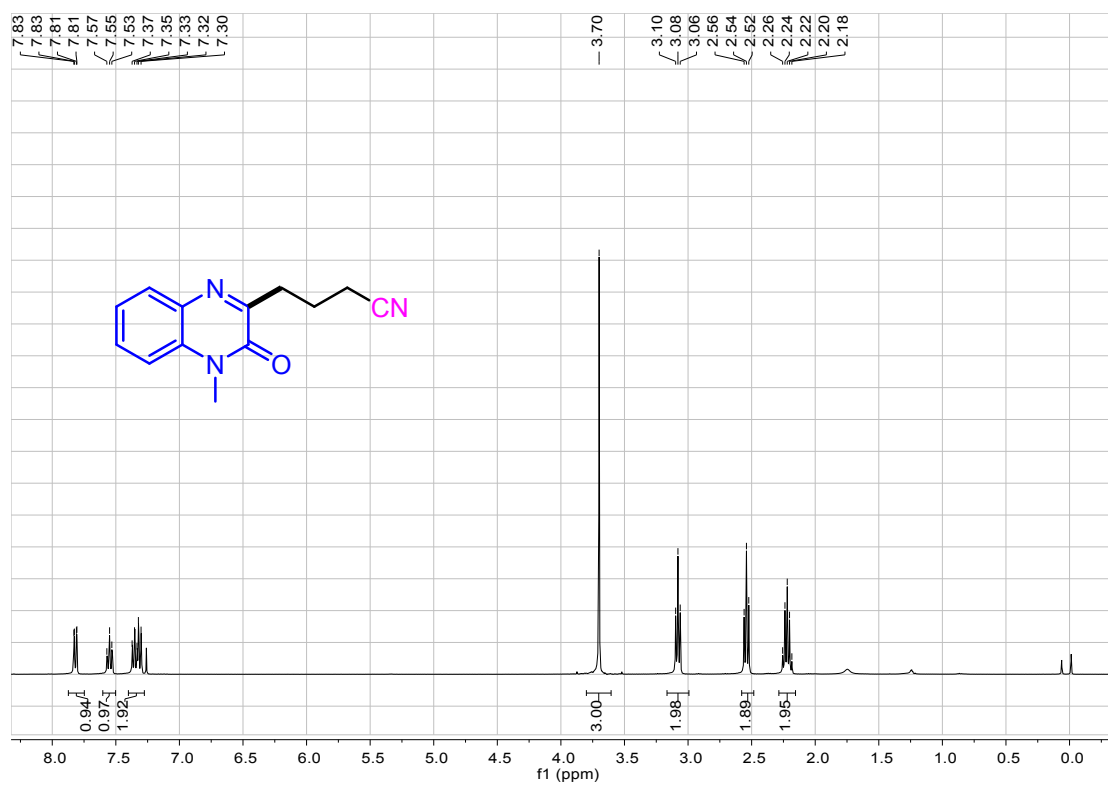

### <sup>13</sup>C NMR Spectrum of **3aa**

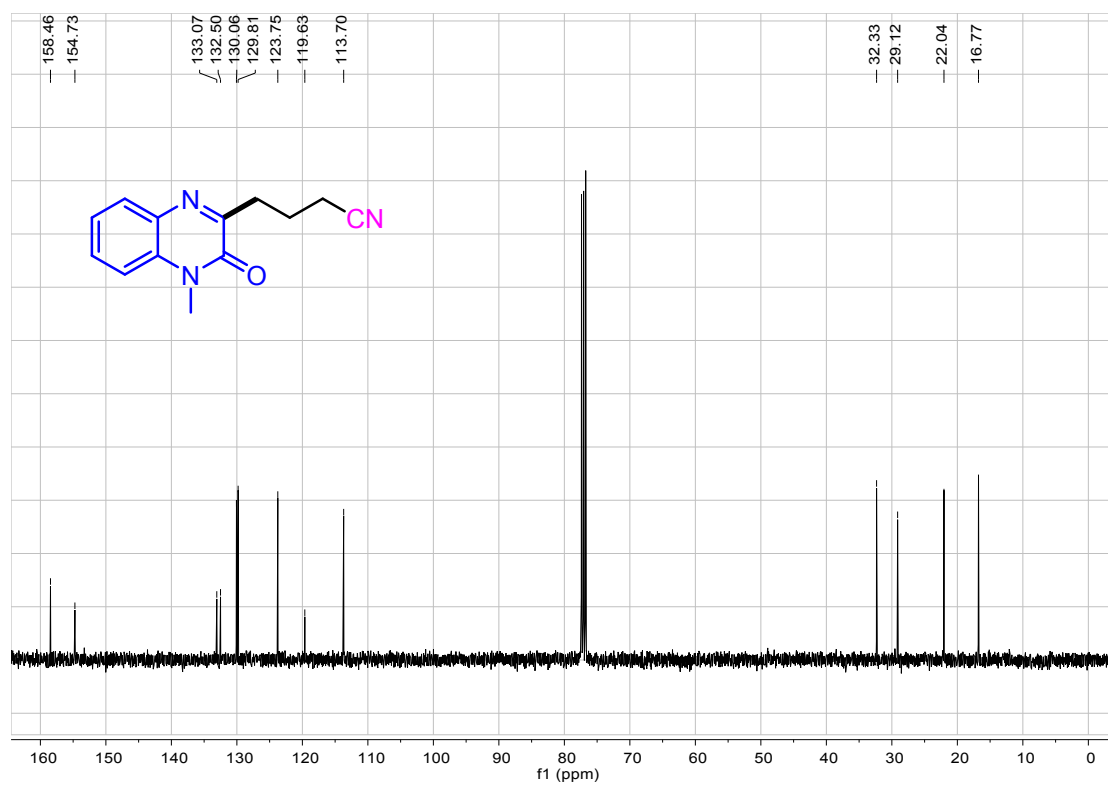

### <sup>1</sup>H NMR Spectrum of **3ab**

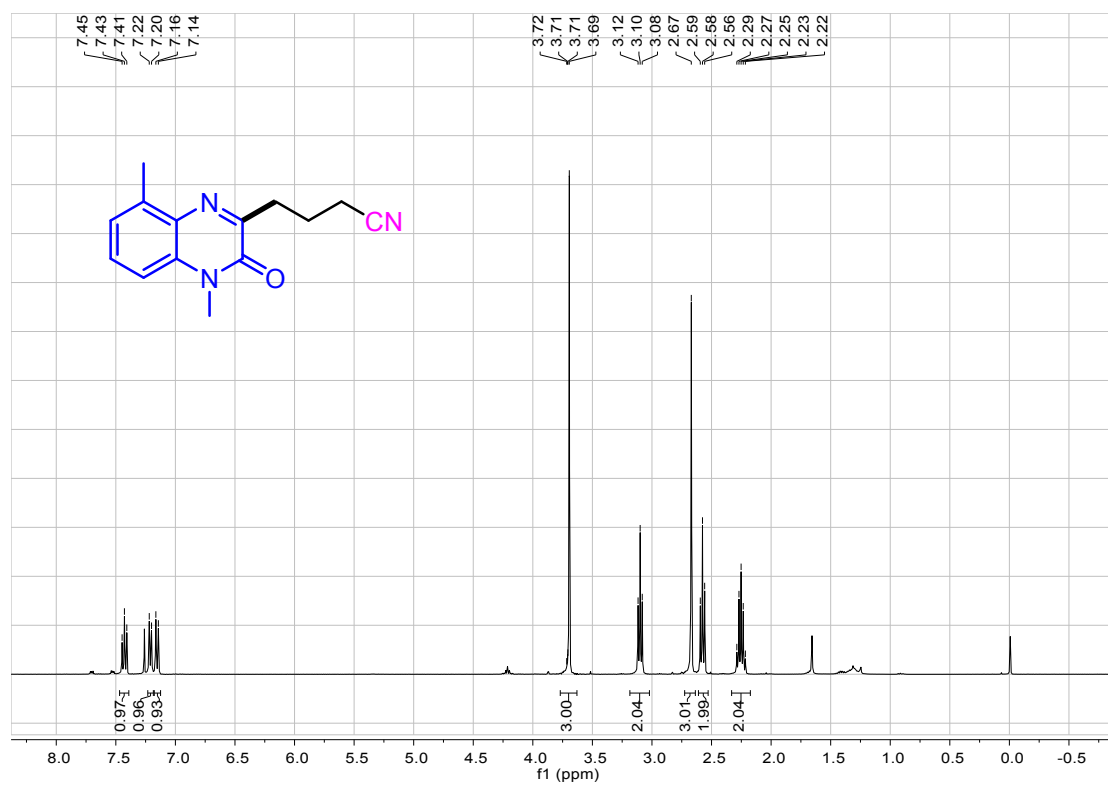

### <sup>13</sup>C NMR Spectrum of **3ab**

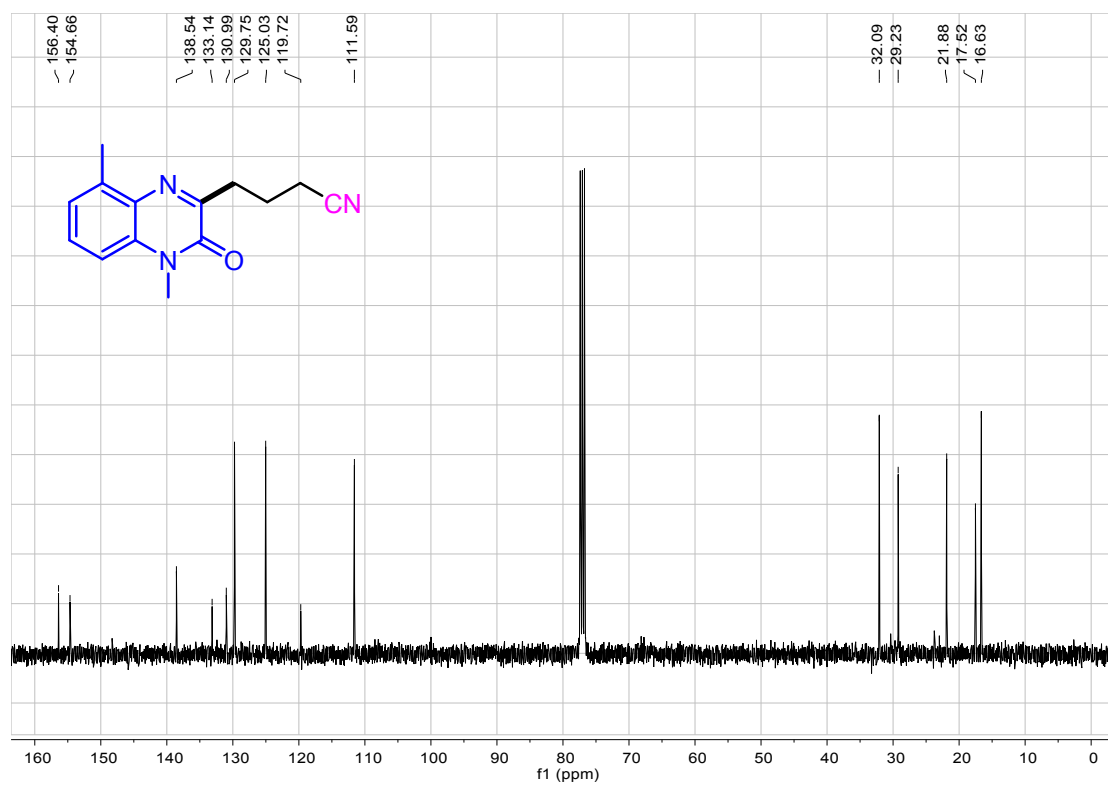

### <sup>1</sup>H NMR Spectrum of 3ac

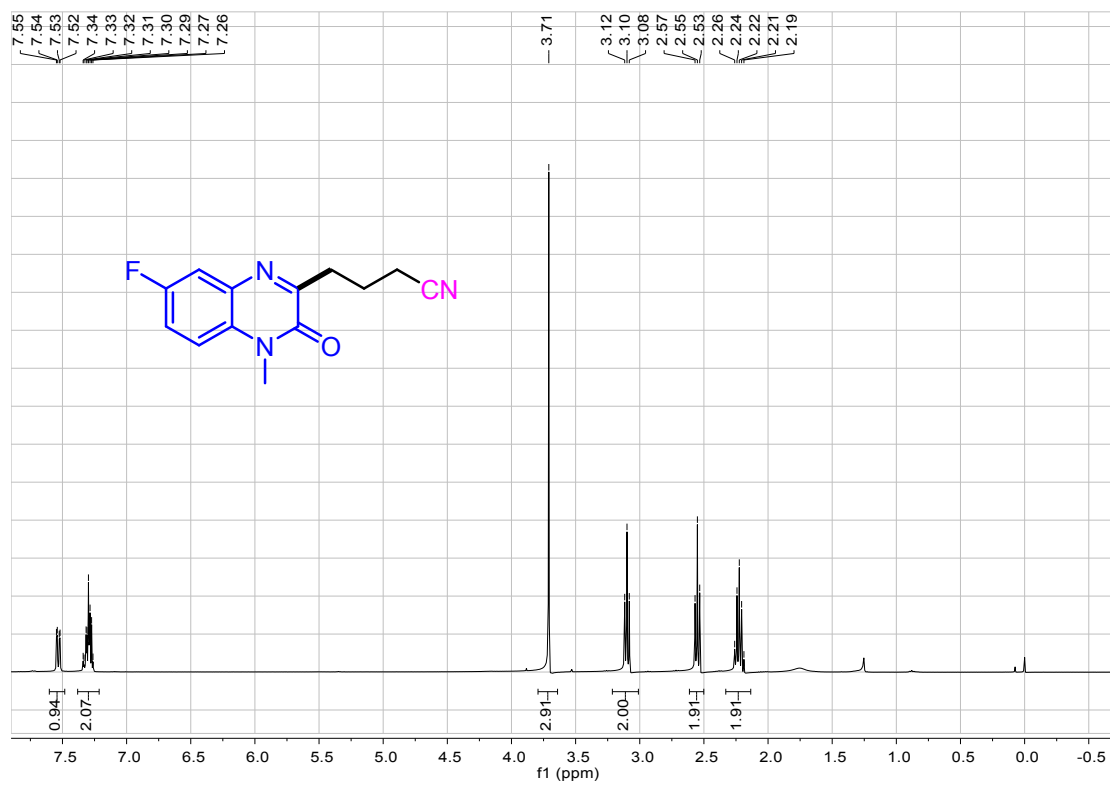

### <sup>13</sup>C NMR Spectrum of 3ac

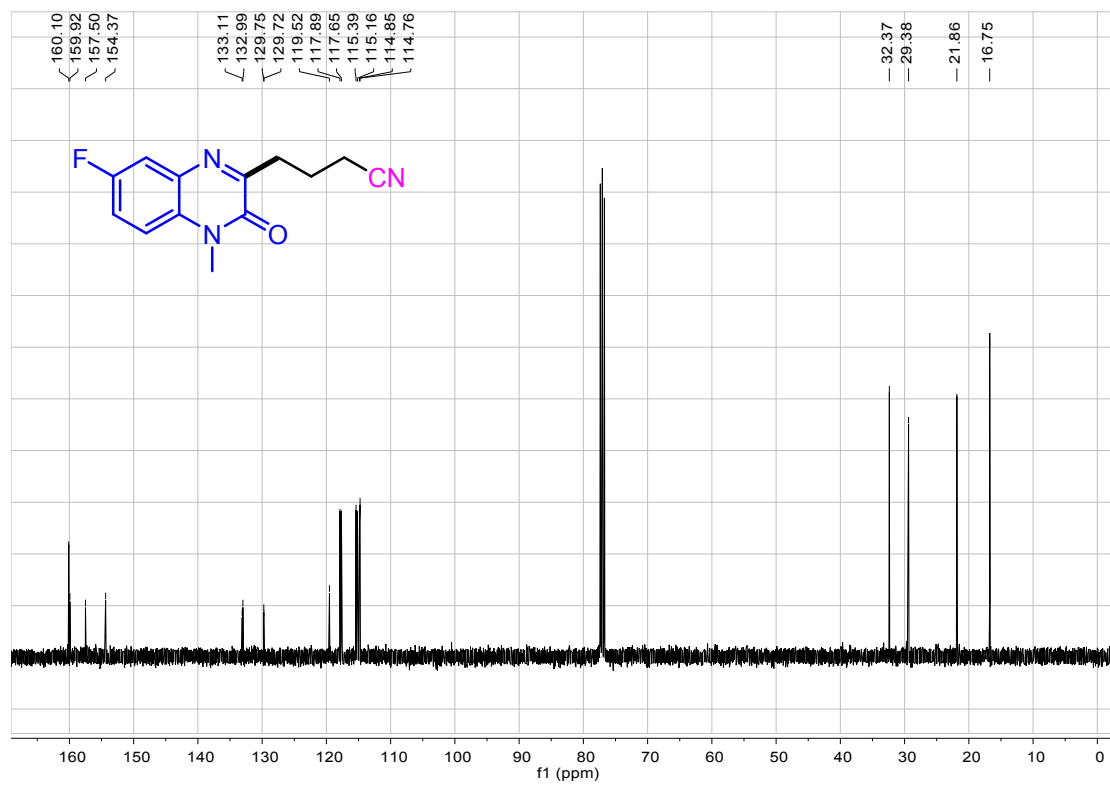

### <sup>1</sup>H NMR Spectrum of **3ad**

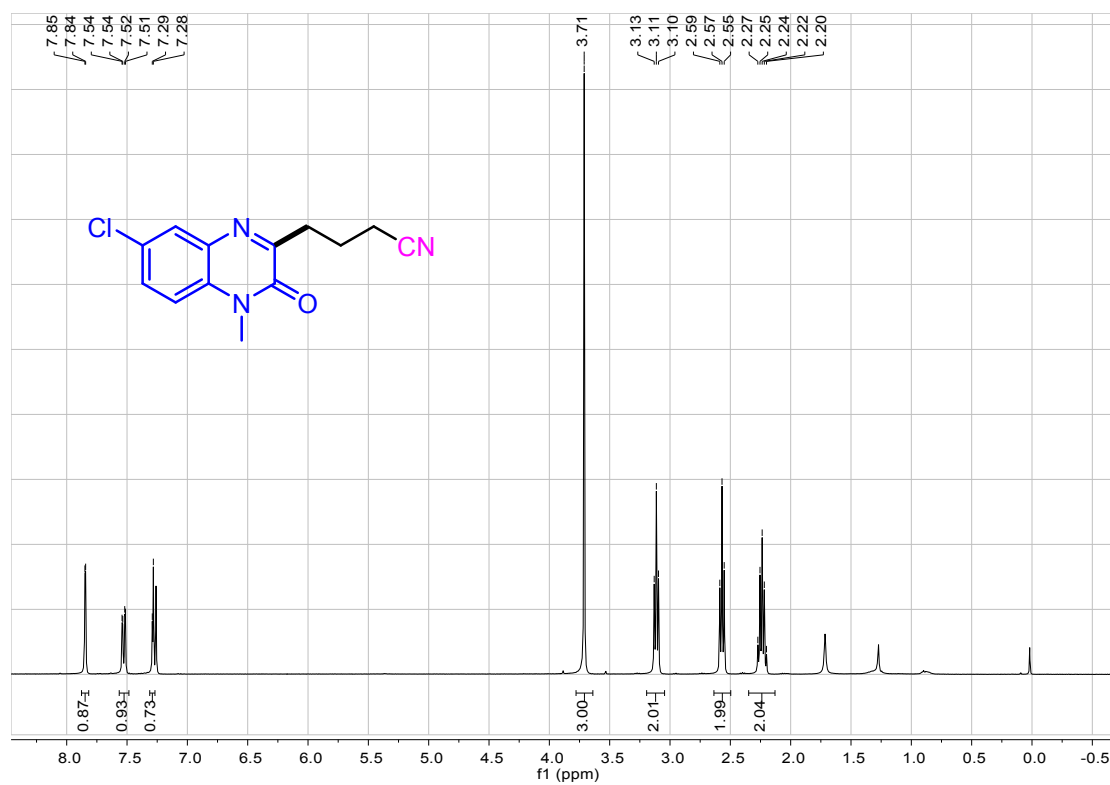

### <sup>13</sup>C NMR Spectrum of **3ad**

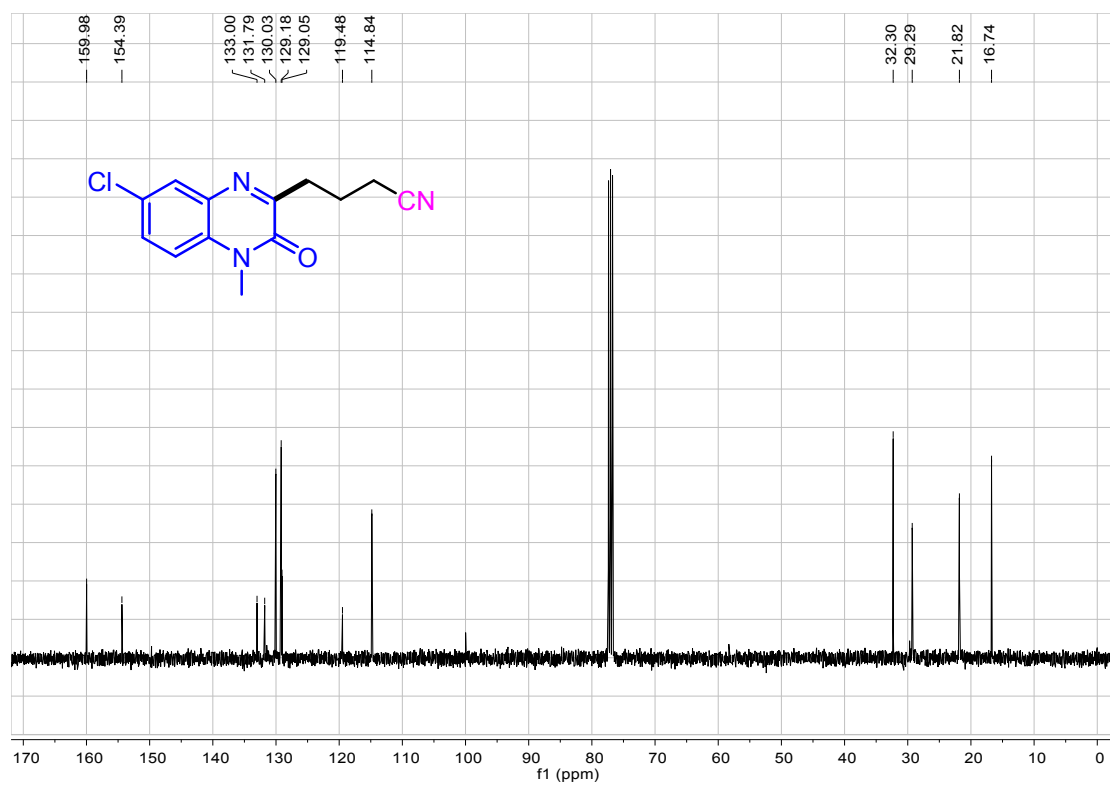

### <sup>1</sup>H NMR Spectrum of **3ae**

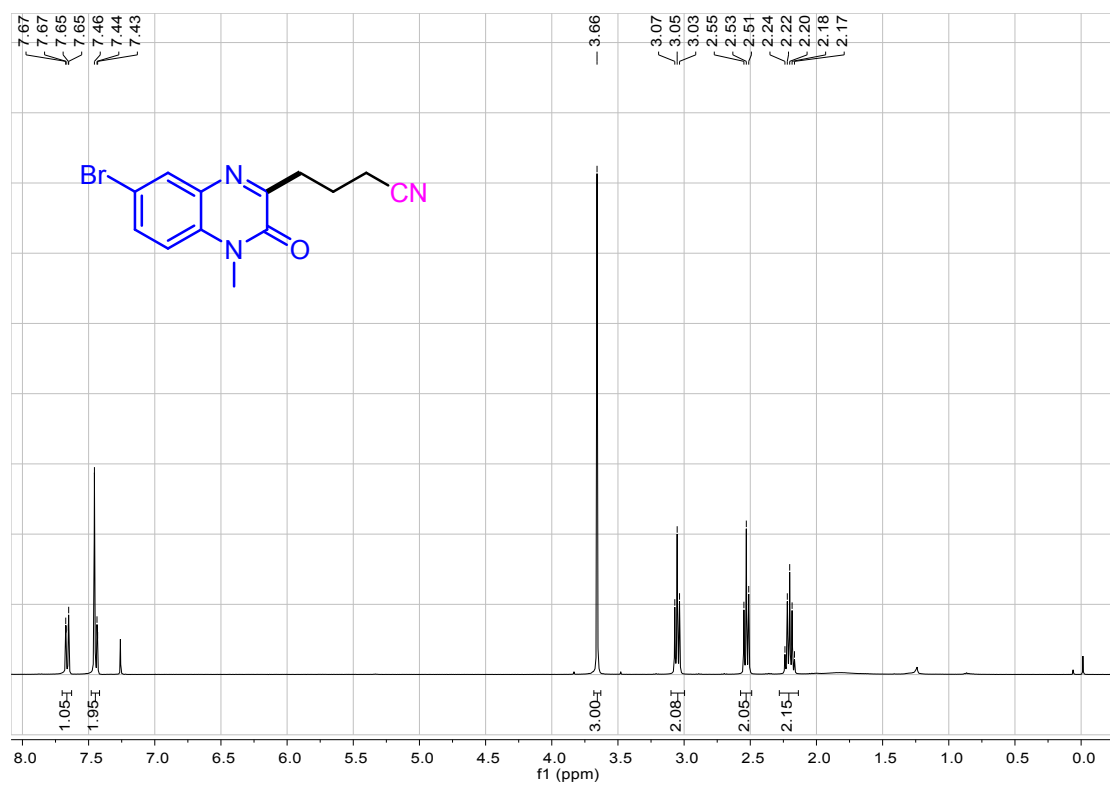

### <sup>13</sup>C NMR Spectrum of **3ae**

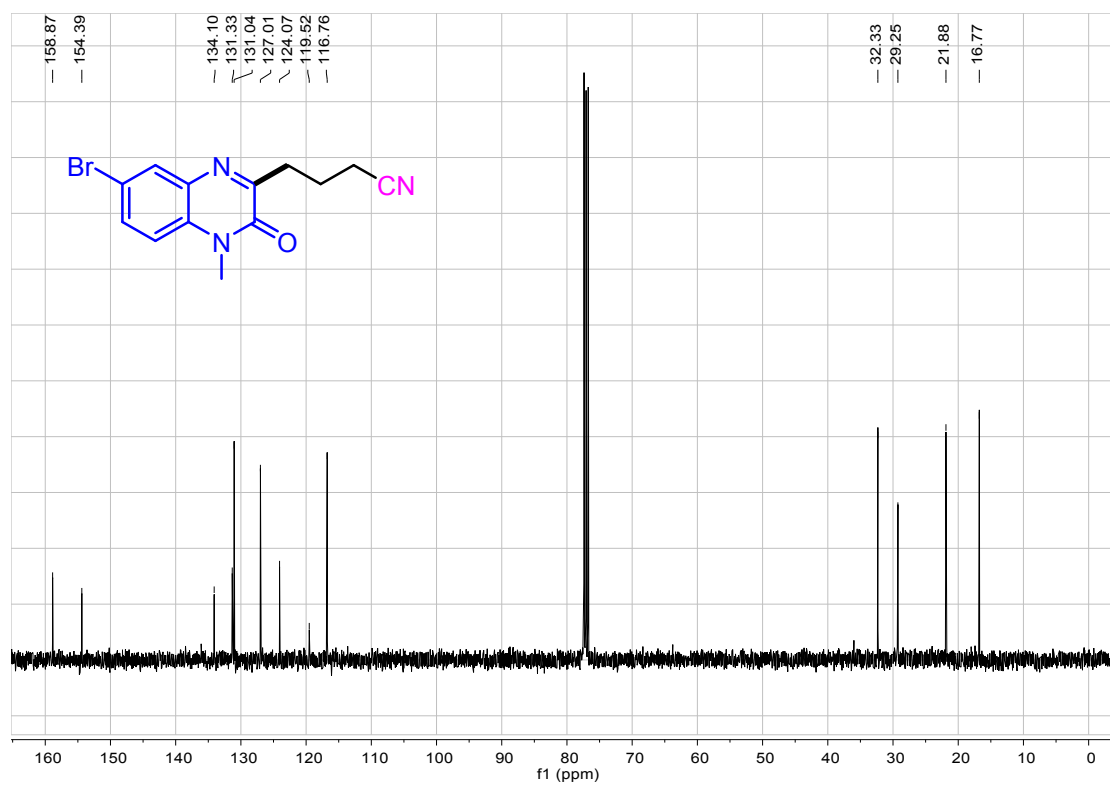

### <sup>1</sup>H NMR Spectrum of **3af**

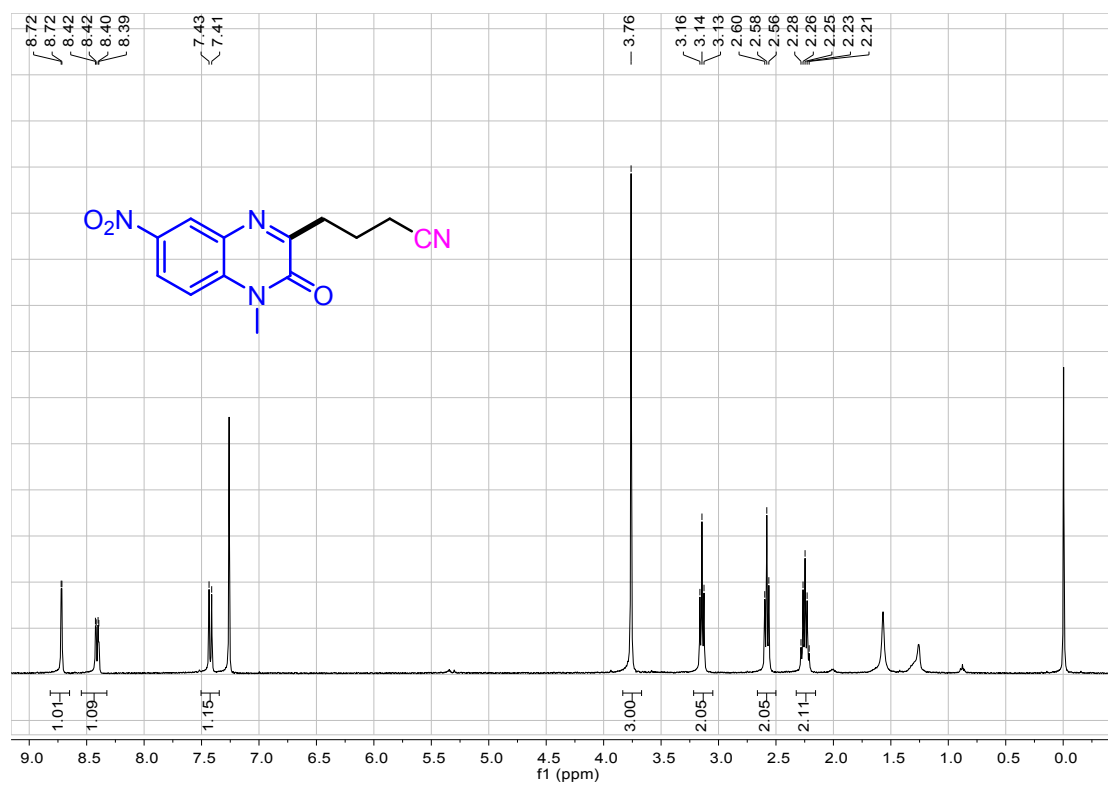

### <sup>13</sup>C NMR Spectrum of **3af**

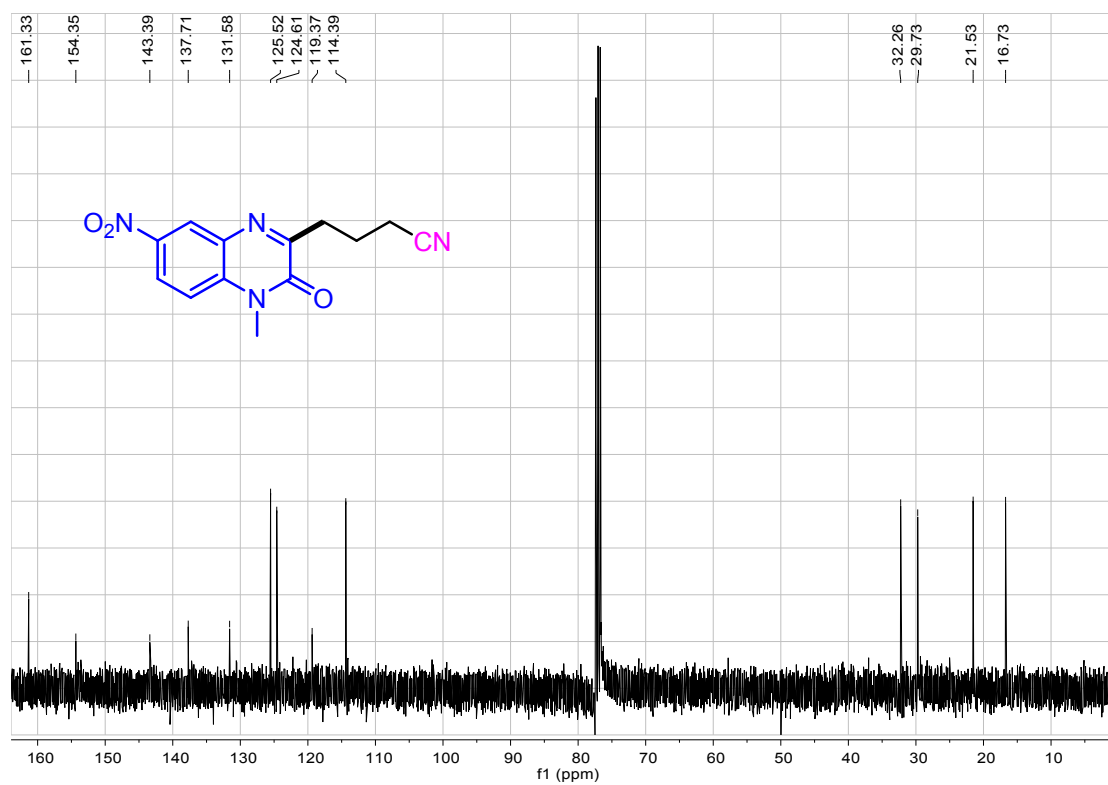



### <sup>1</sup>H NMR Spectrum of **3ag**

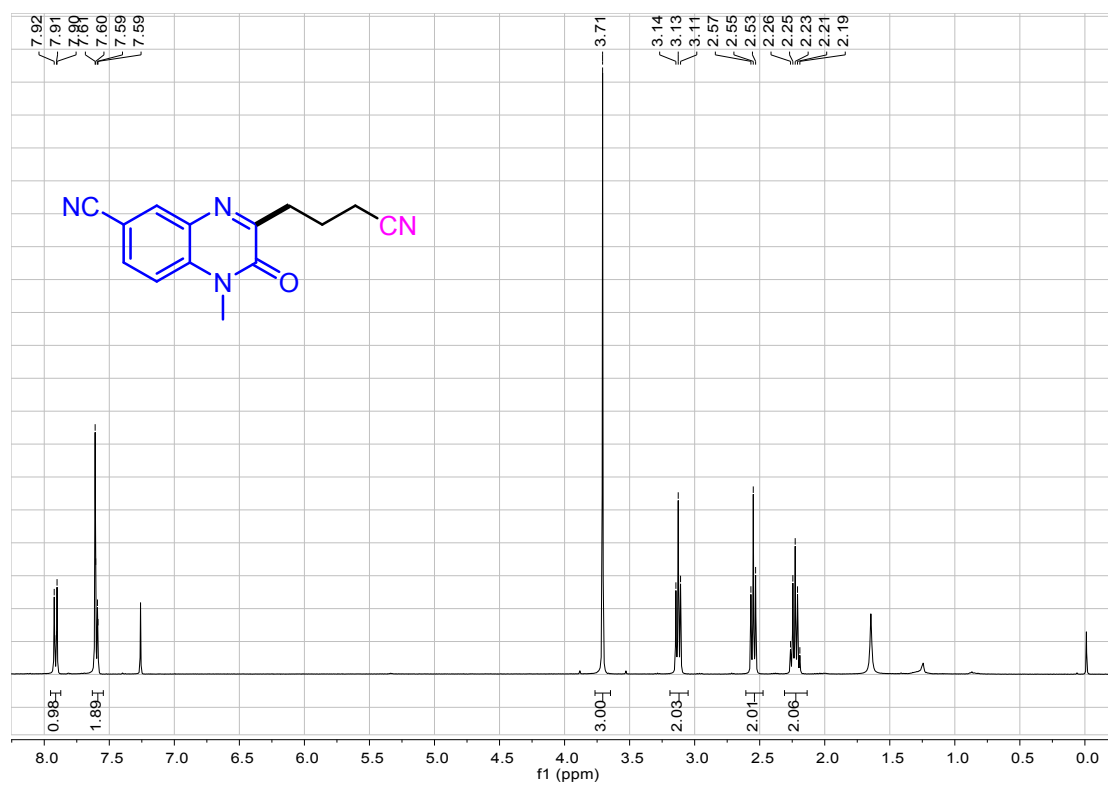

### <sup>13</sup>C NMR Spectrum of **3ag**

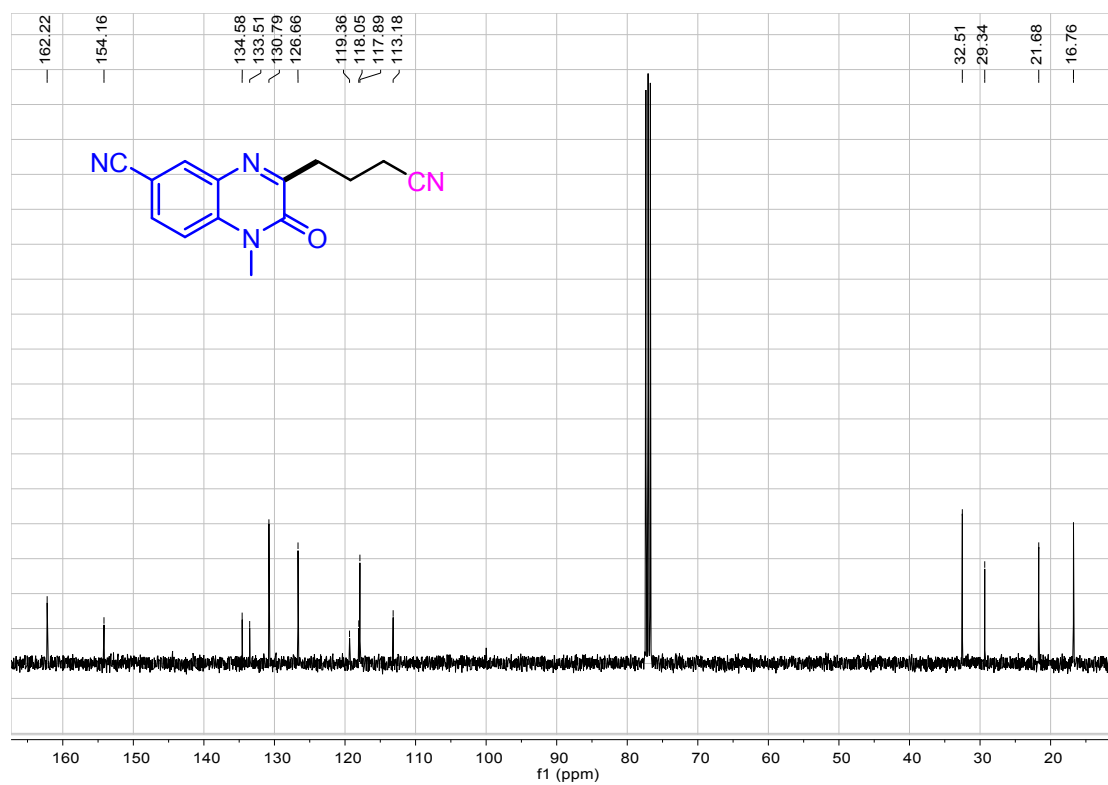

### <sup>1</sup>H NMR Spectrum of 3ah

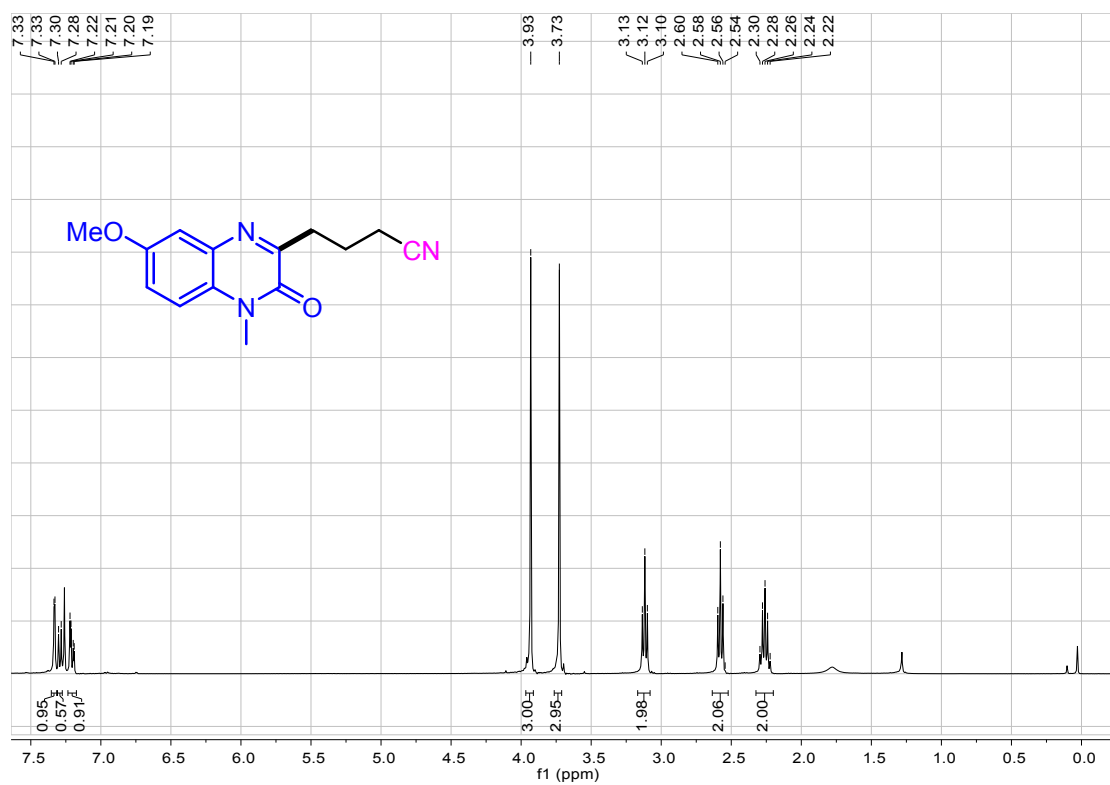

### <sup>13</sup>C NMR Spectrum of 3ah

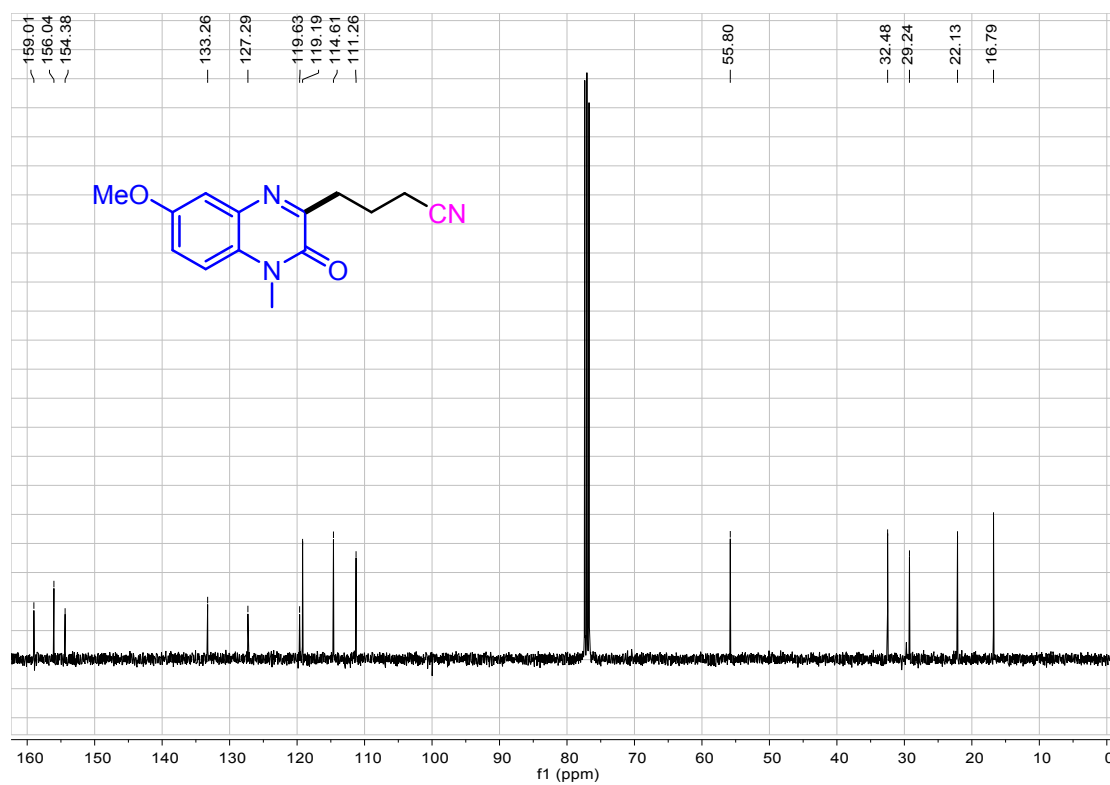

### <sup>1</sup>H NMR Spectrum of **3ai**

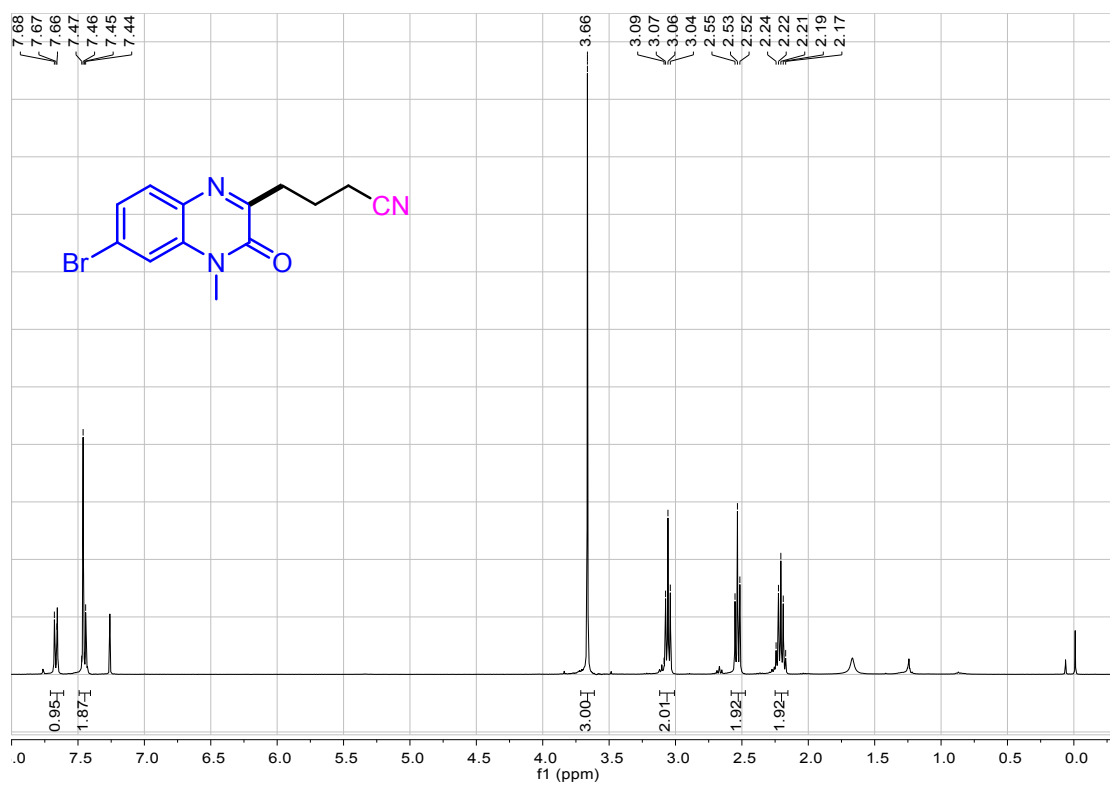

### <sup>13</sup>C NMR Spectrum of **3ai**

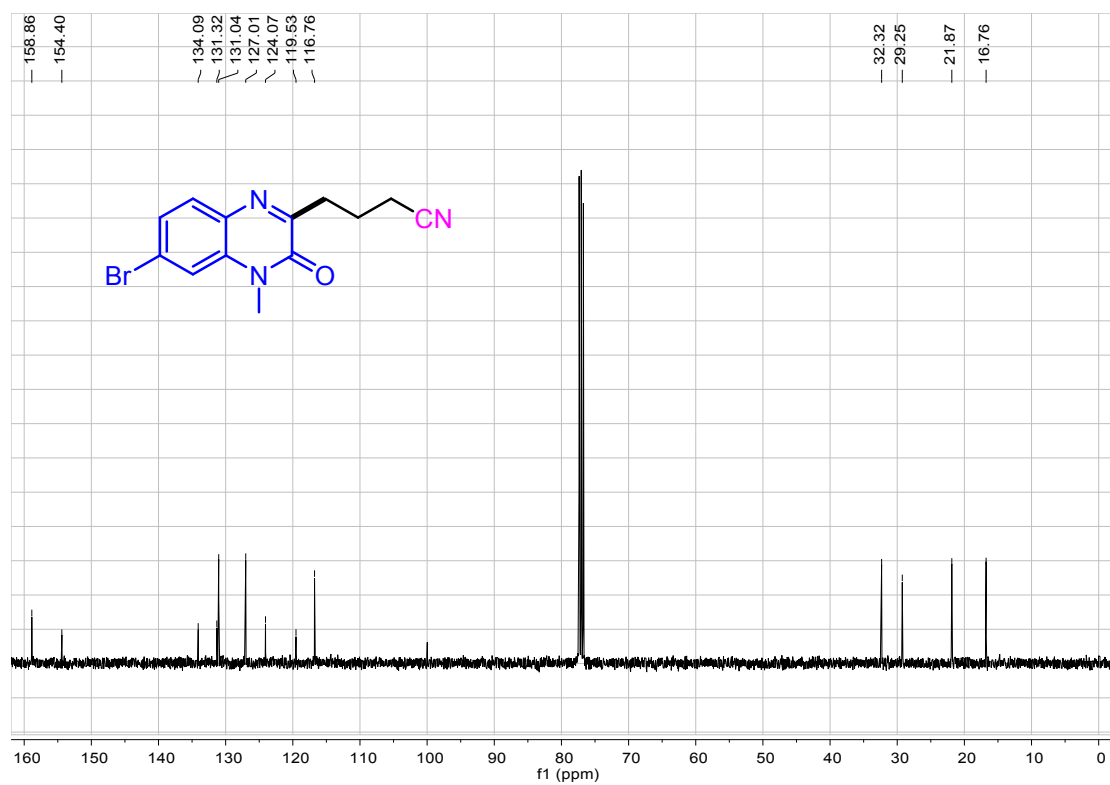

### <sup>1</sup>H NMR Spectrum of 3aj

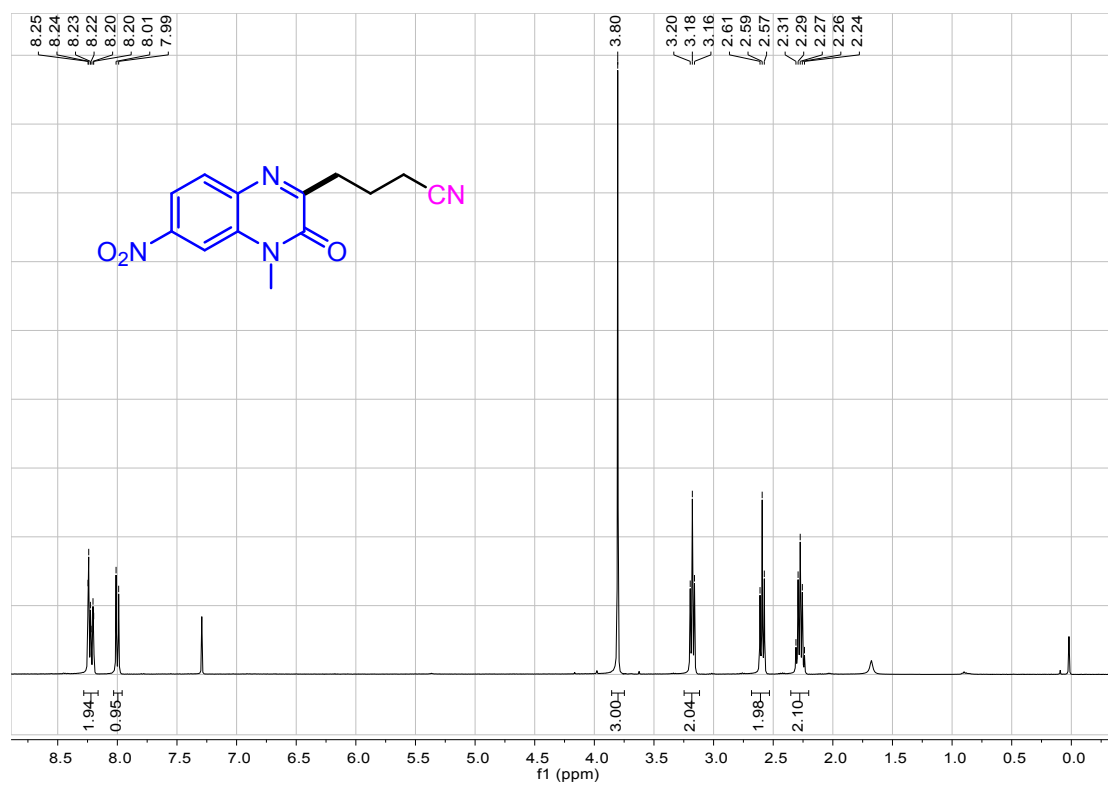

### <sup>13</sup>C NMR Spectrum of 3aj

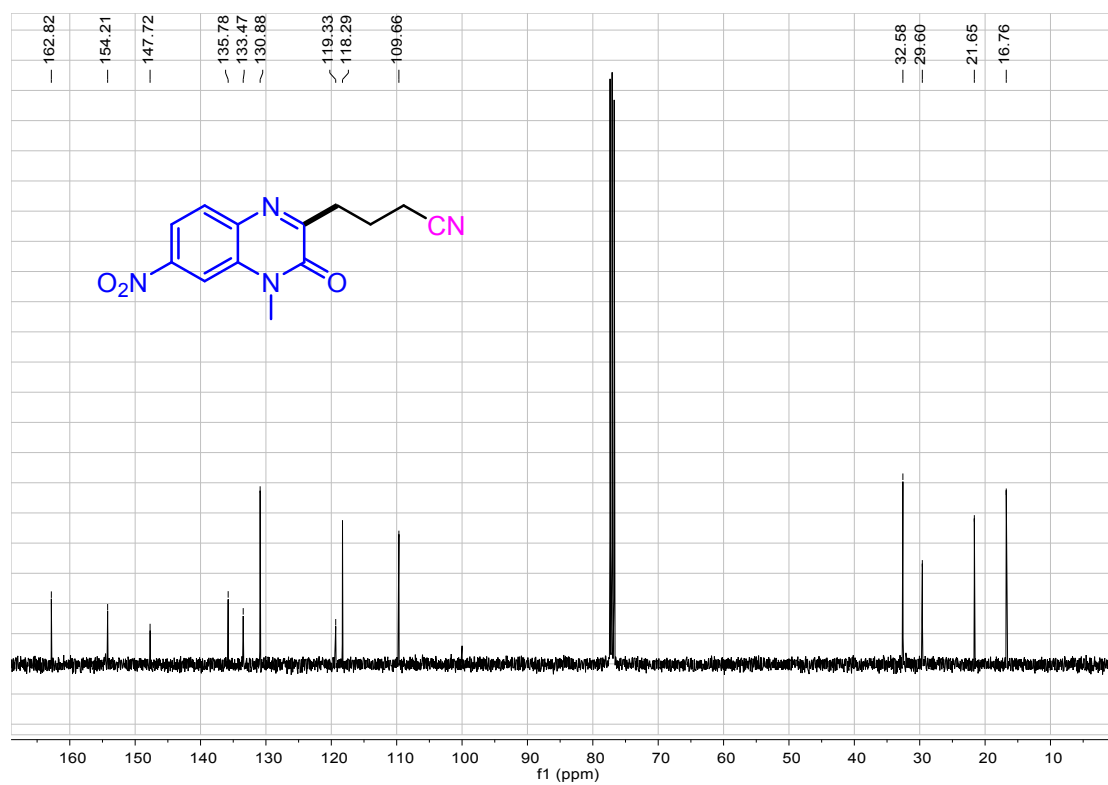

### <sup>1</sup>H NMR Spectrum of **3ak**

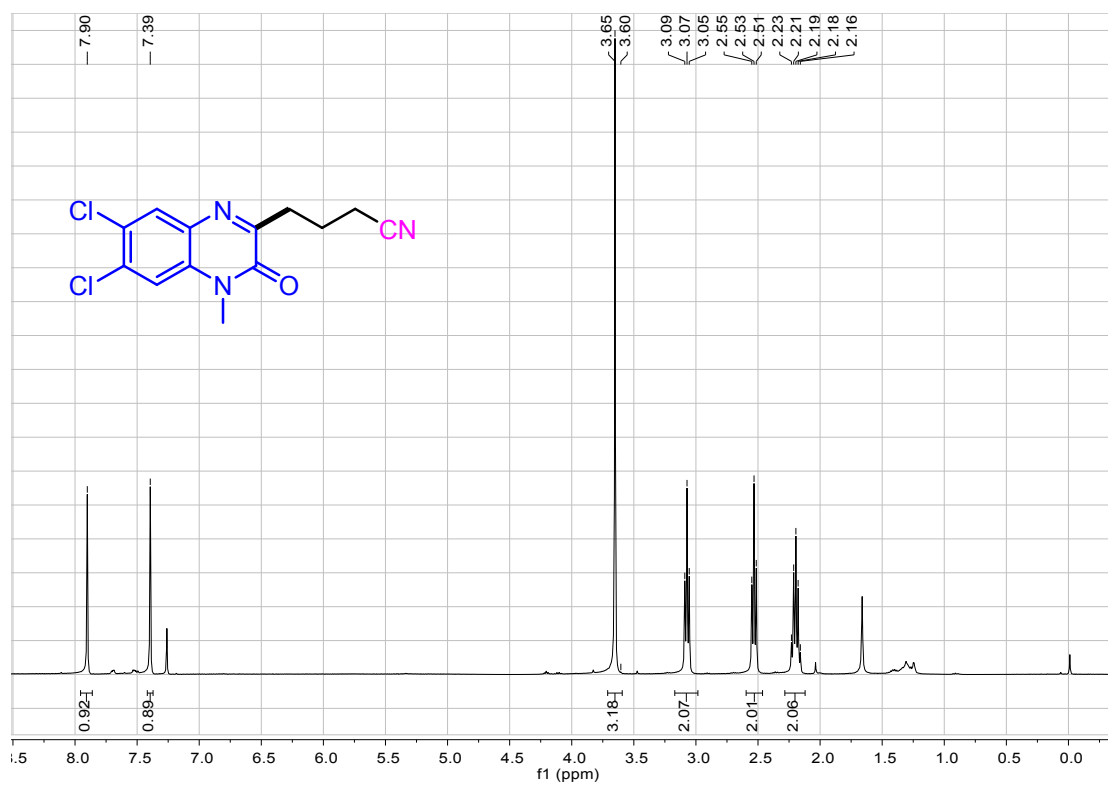

### <sup>13</sup>C NMR Spectrum of **3ak**

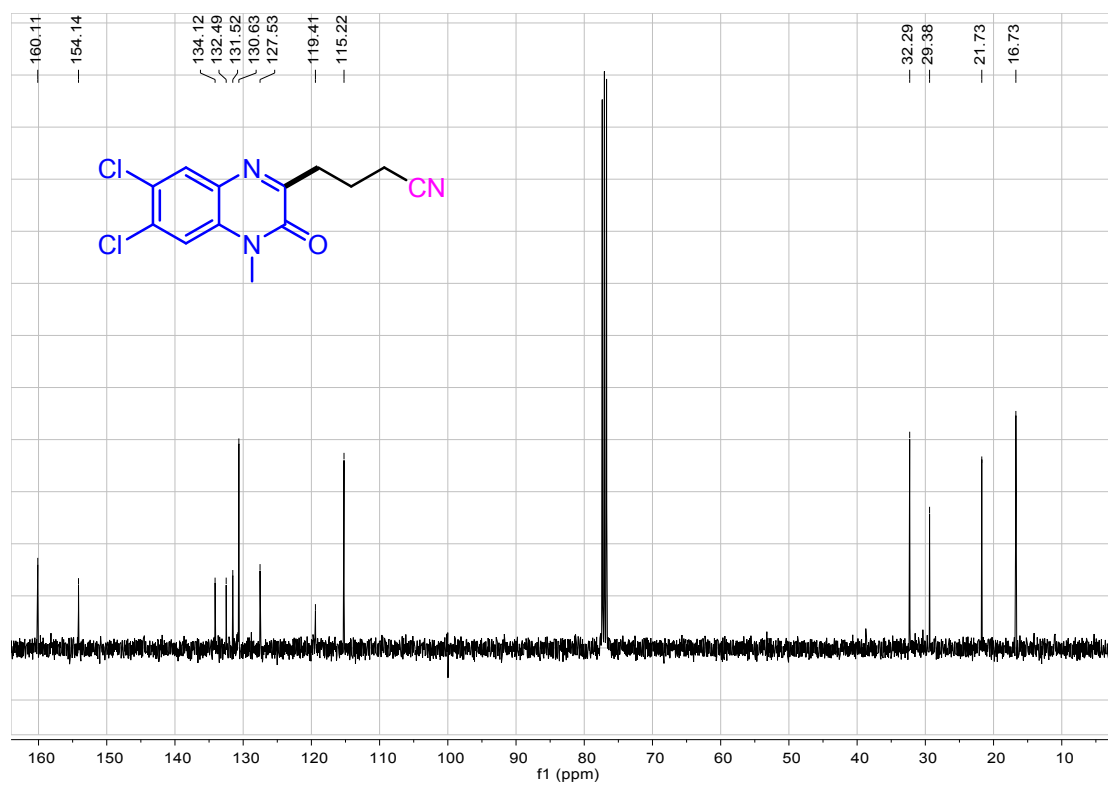

### <sup>1</sup>H NMR Spectrum of 3al

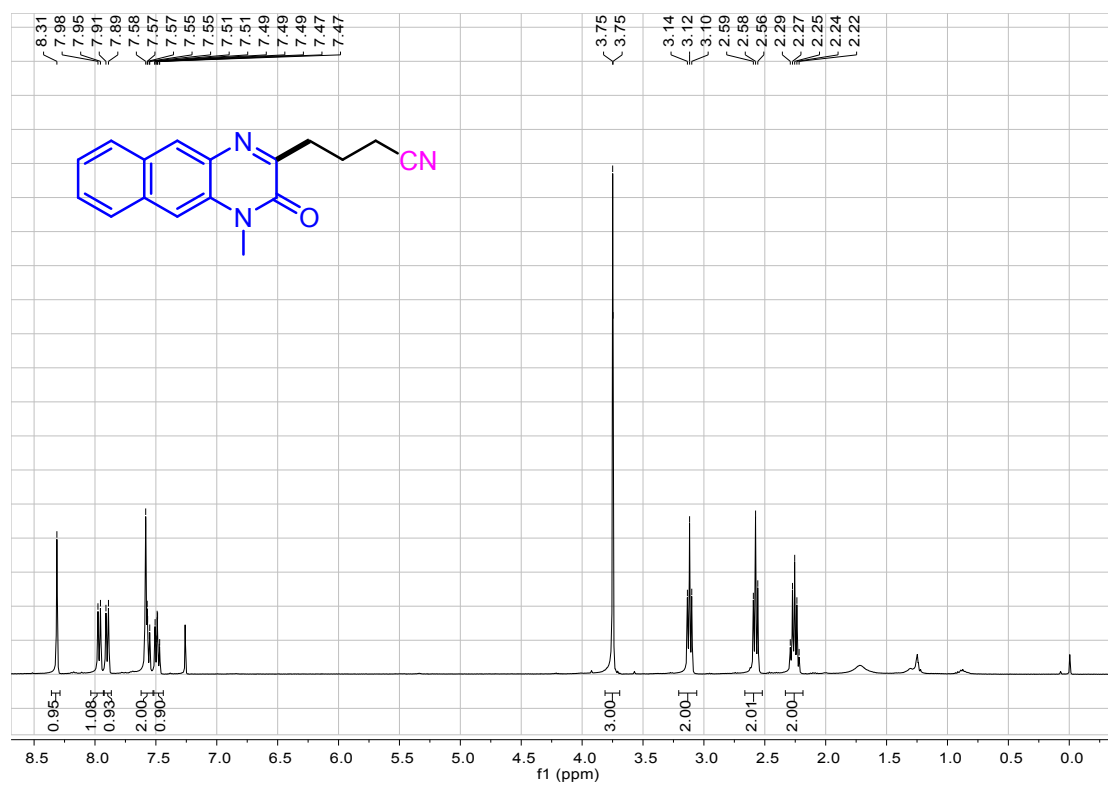

### <sup>13</sup>C NMR Spectrum of 3al

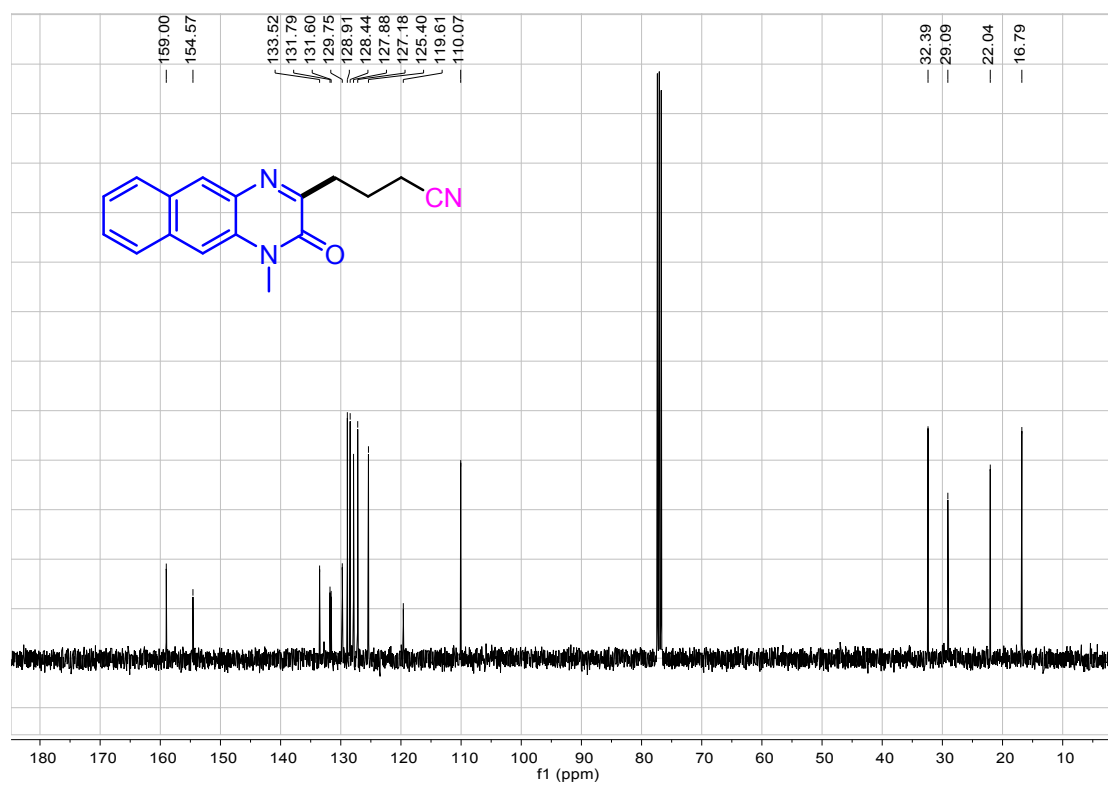

### <sup>1</sup>H NMR Spectrum of **3am**

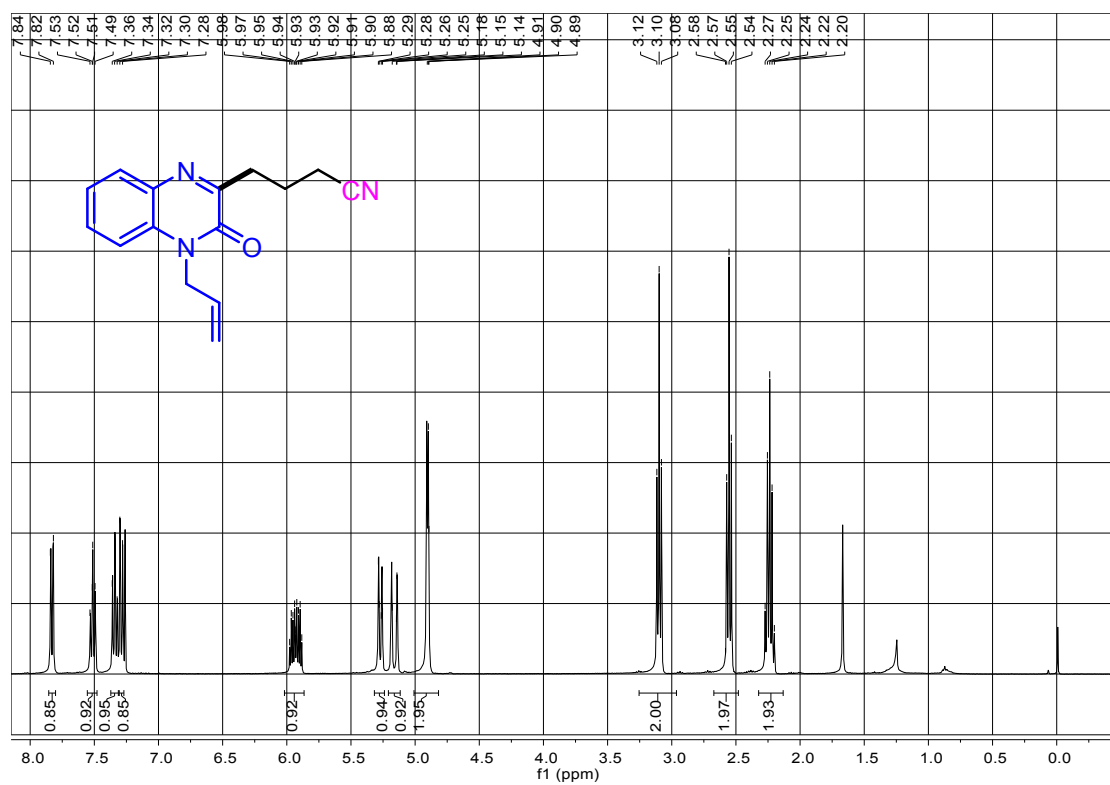

### <sup>13</sup>C NMR Spectrum of **3I**

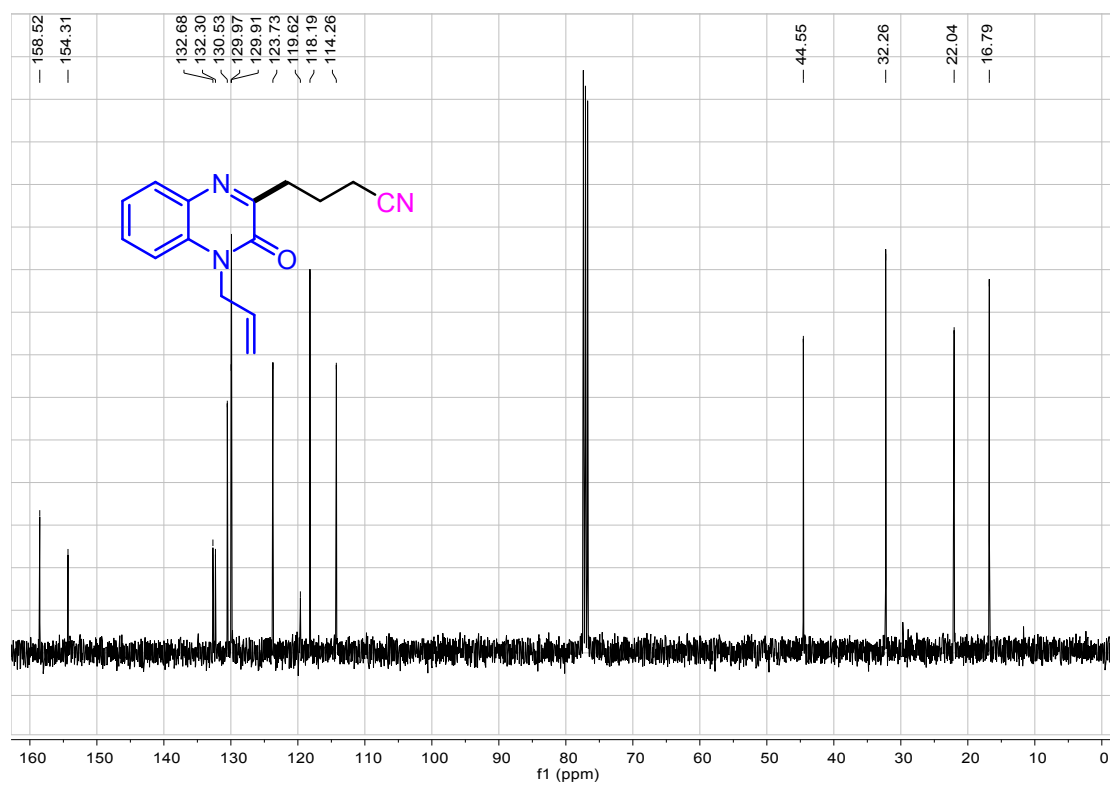

### <sup>1</sup>H NMR Spectrum of 3an

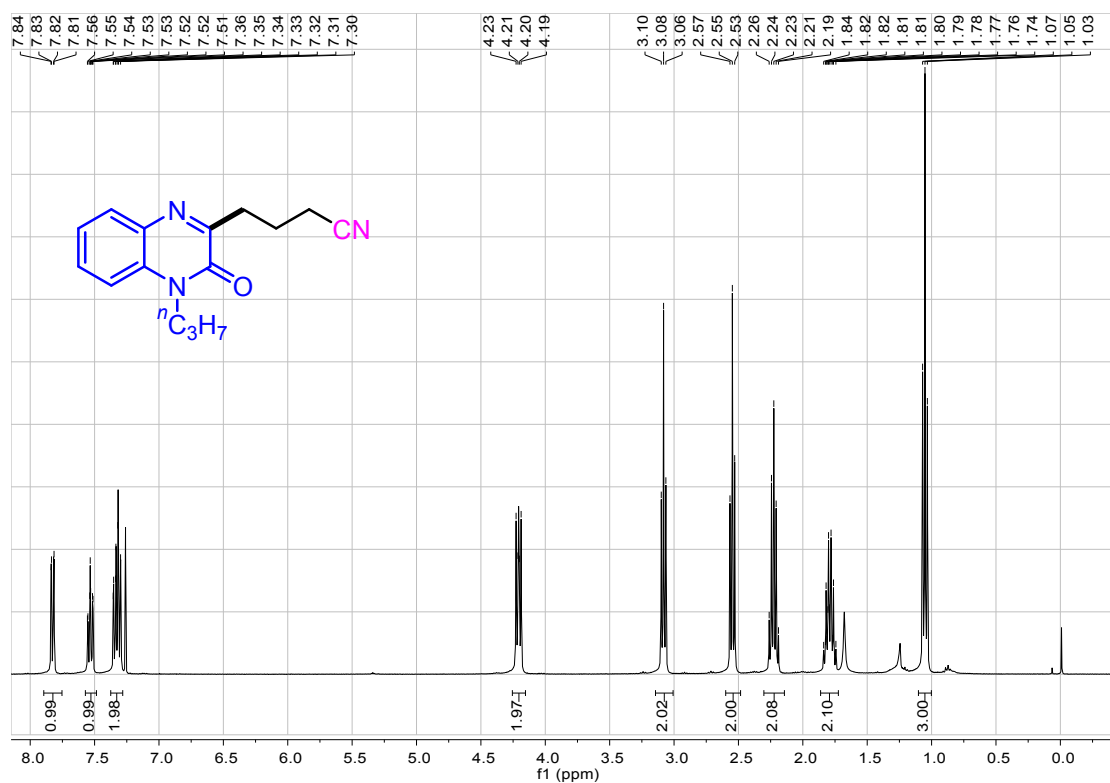

### <sup>13</sup>C NMR Spectrum of 3an

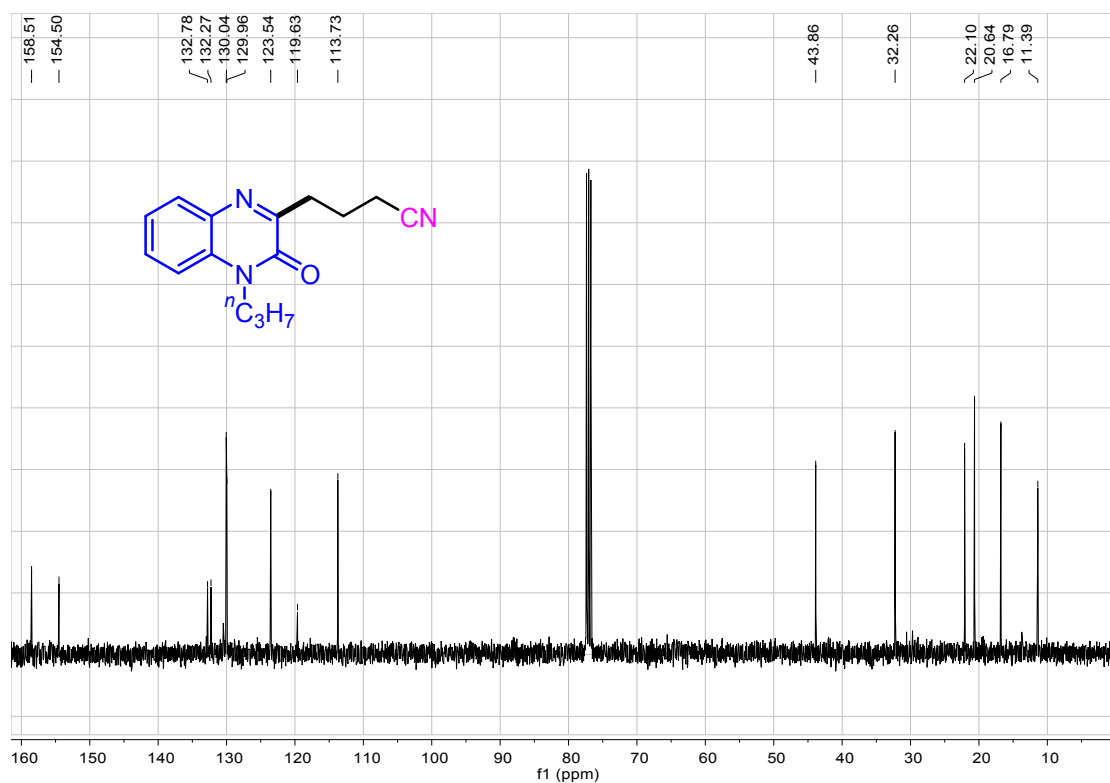



### <sup>1</sup>H NMR Spectrum of 3ao

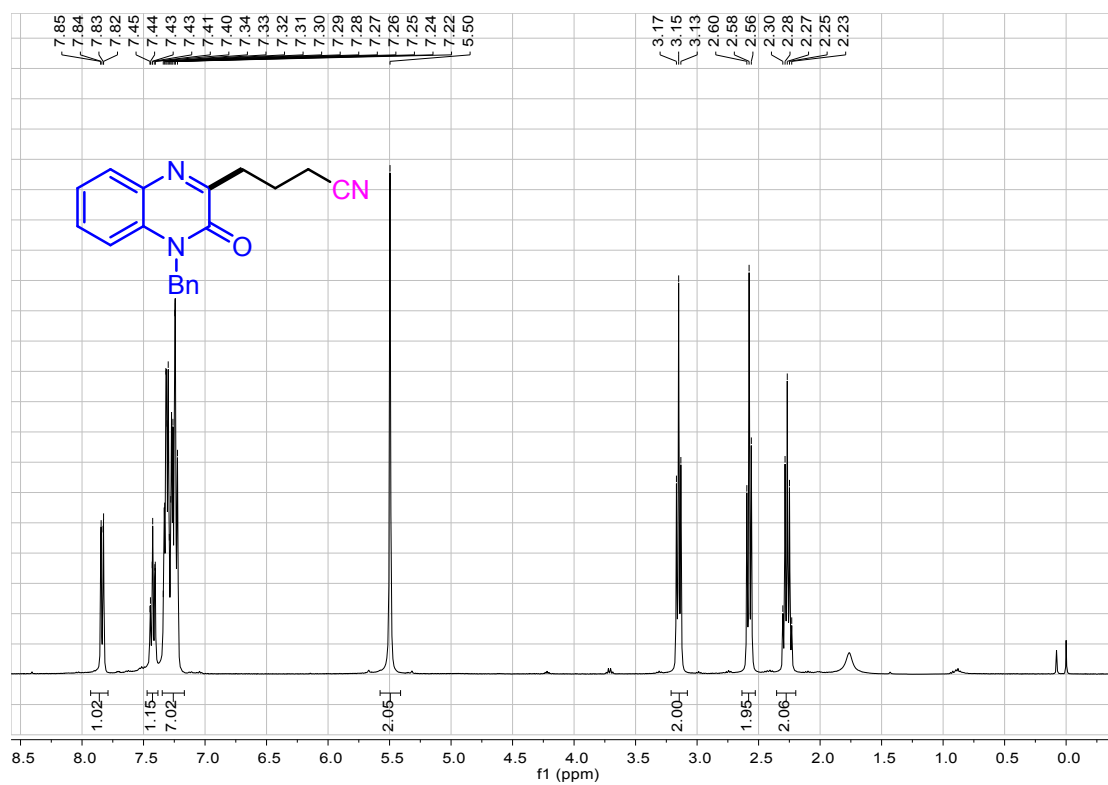

### <sup>13</sup>C NMR Spectrum of 3ao

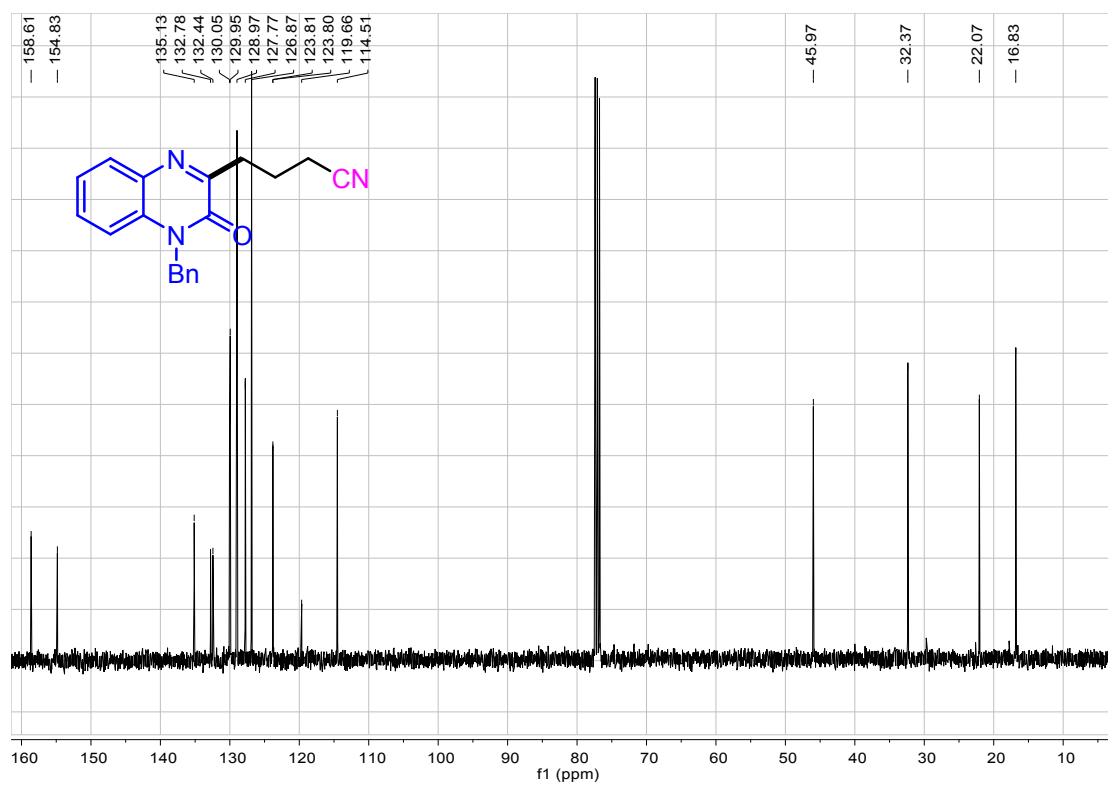

### <sup>1</sup>H NMR Spectrum of 3ap

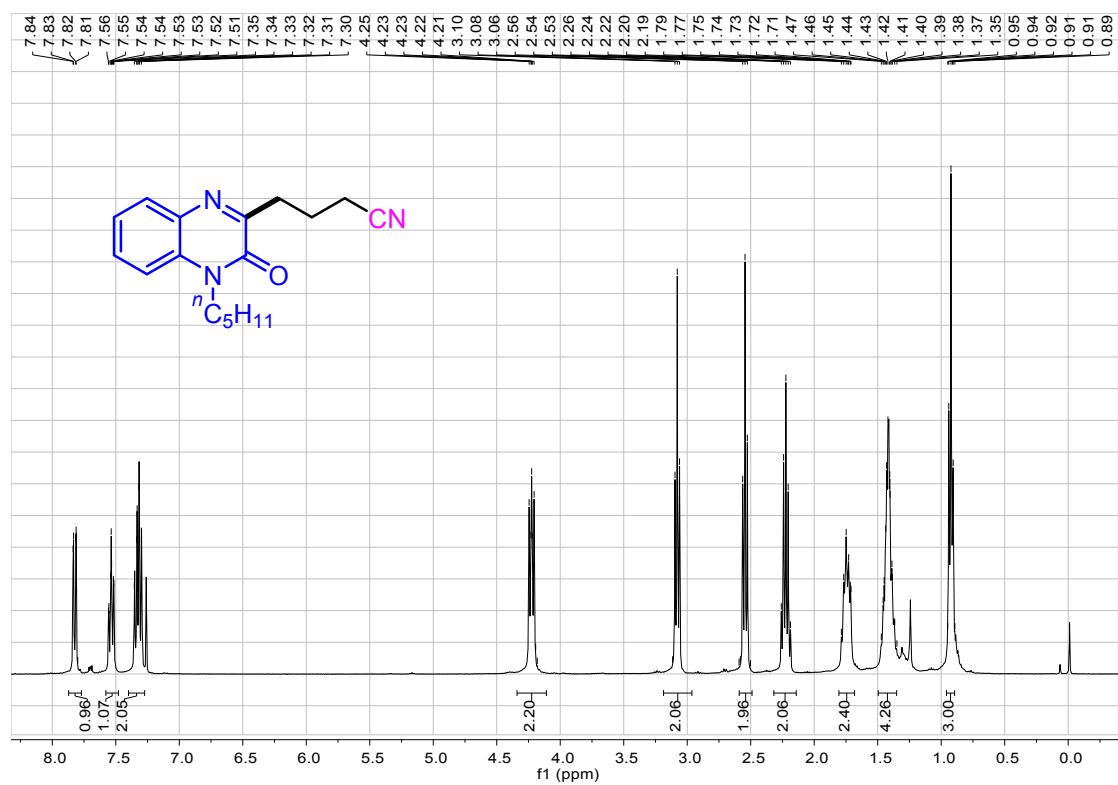

### <sup>13</sup>C NMR Spectrum of 3ap

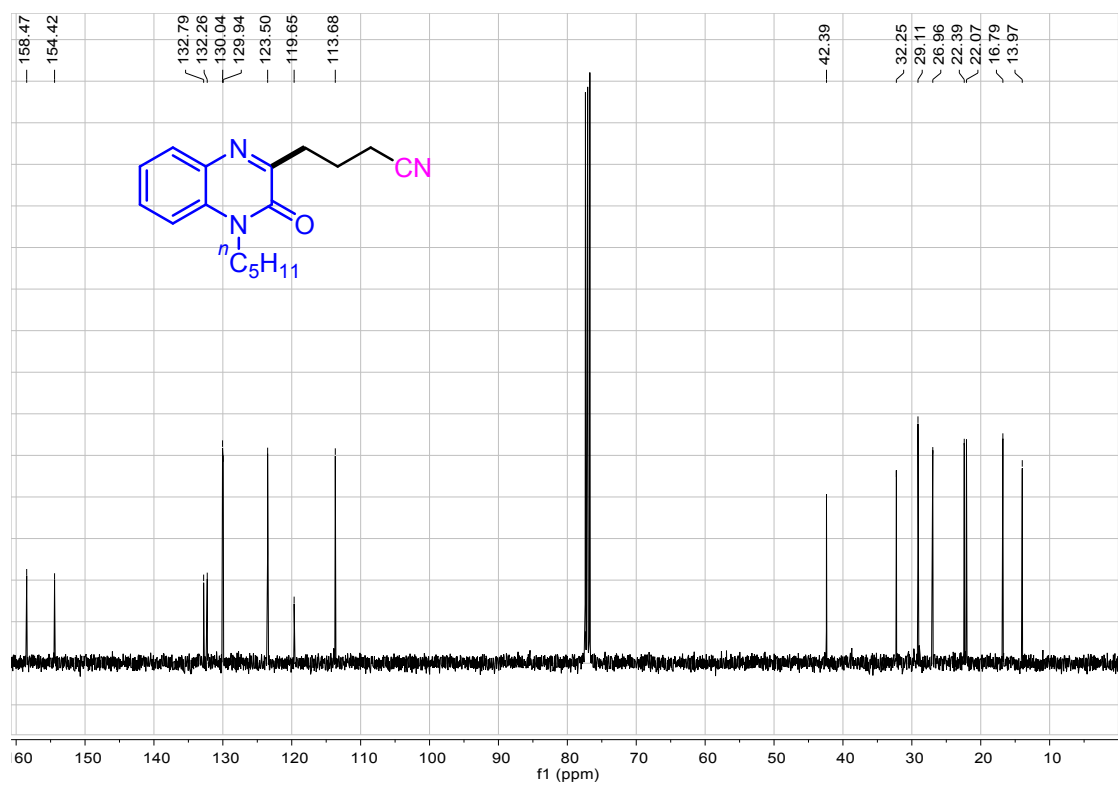

### <sup>1</sup>H NMR Spectrum of 3aq

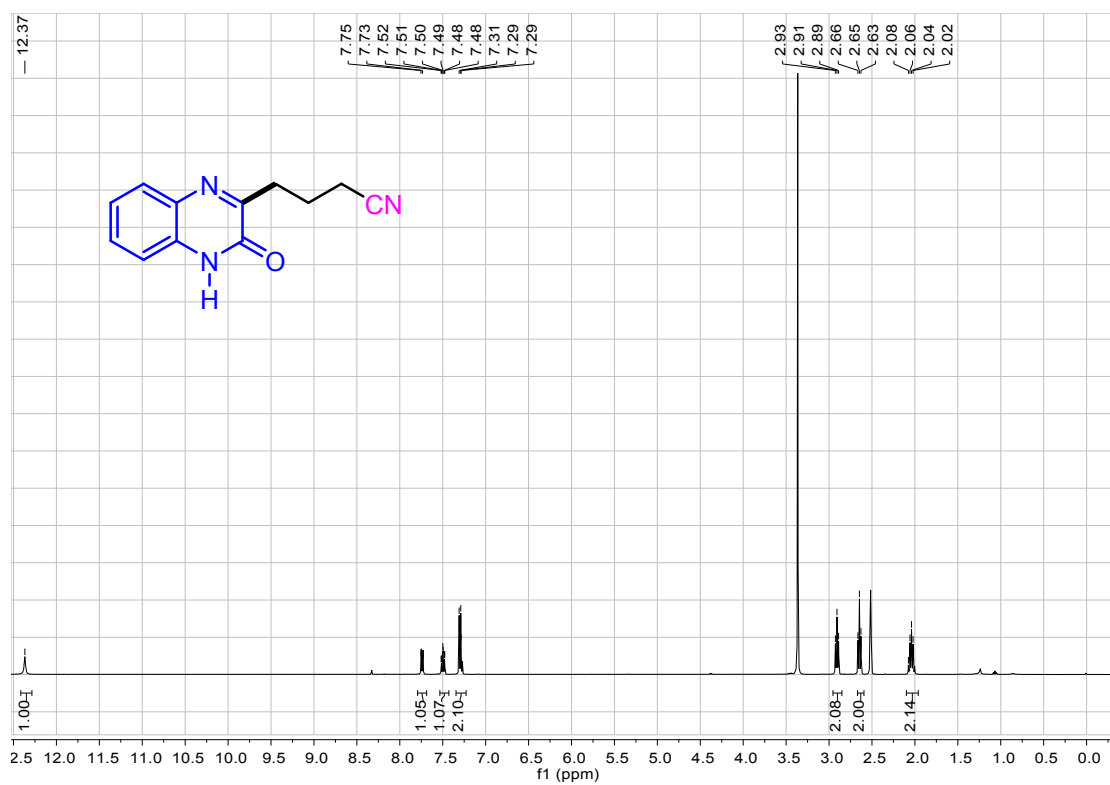

### <sup>13</sup>C NMR Spectrum of 3aq

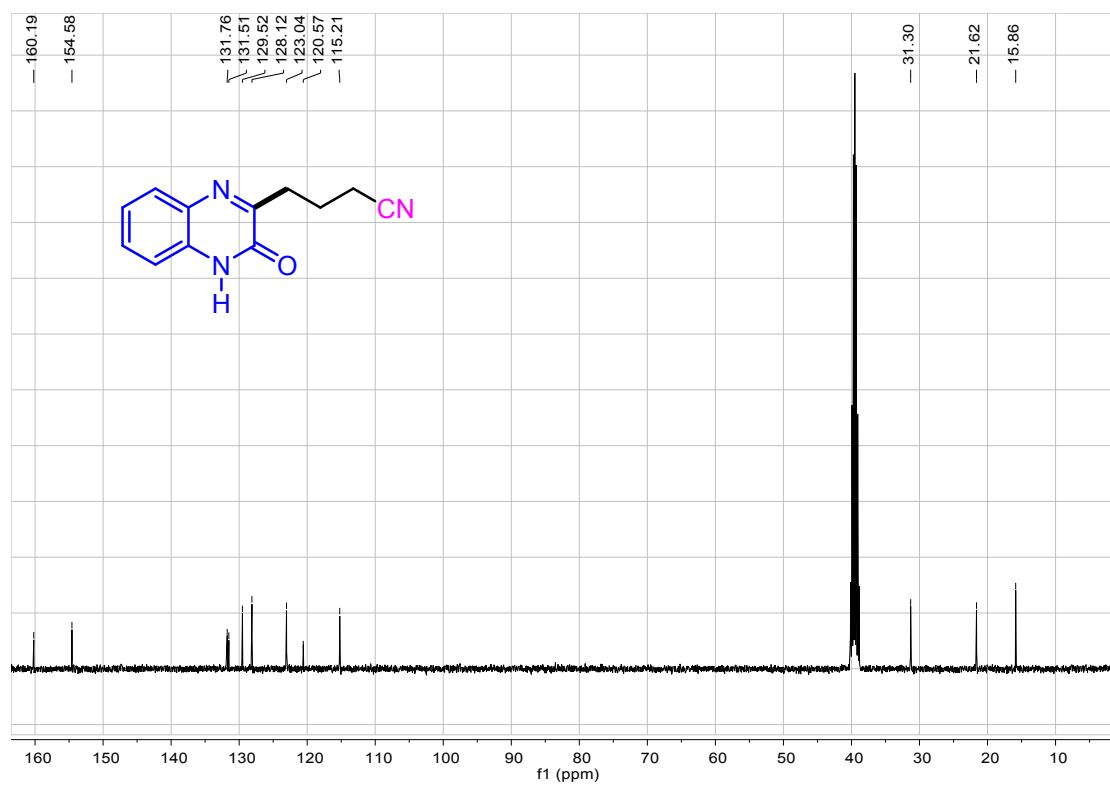

### <sup>1</sup>H NMR Spectrum of **3ba**

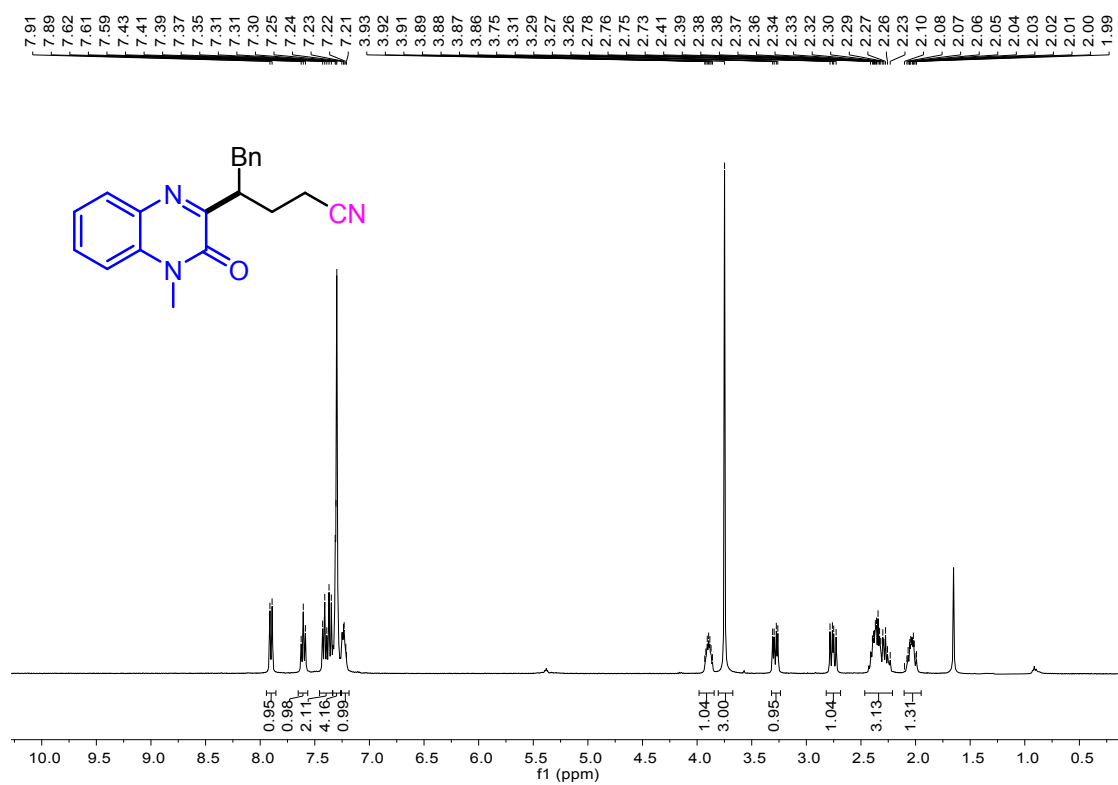

### <sup>13</sup>C NMR Spectrum of **3ba**

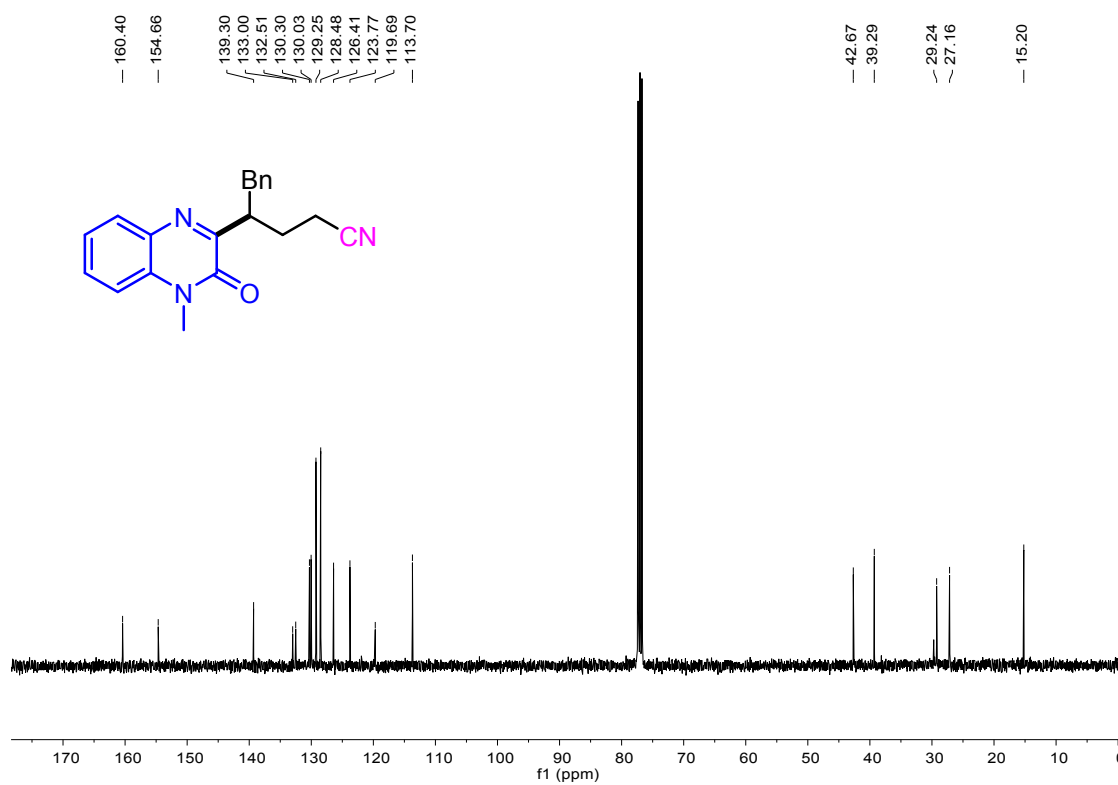

### <sup>1</sup>H NMR Spectrum of 3ca

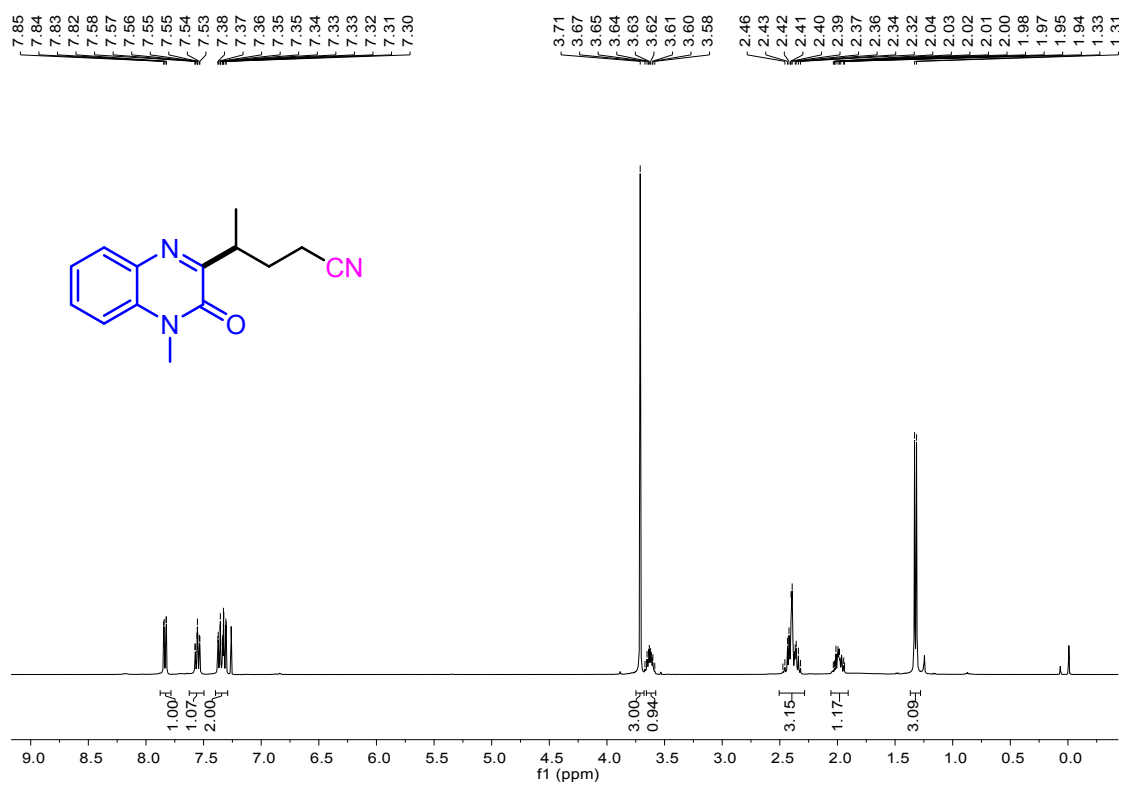

### <sup>13</sup>C NMR Spectrum of 3ca

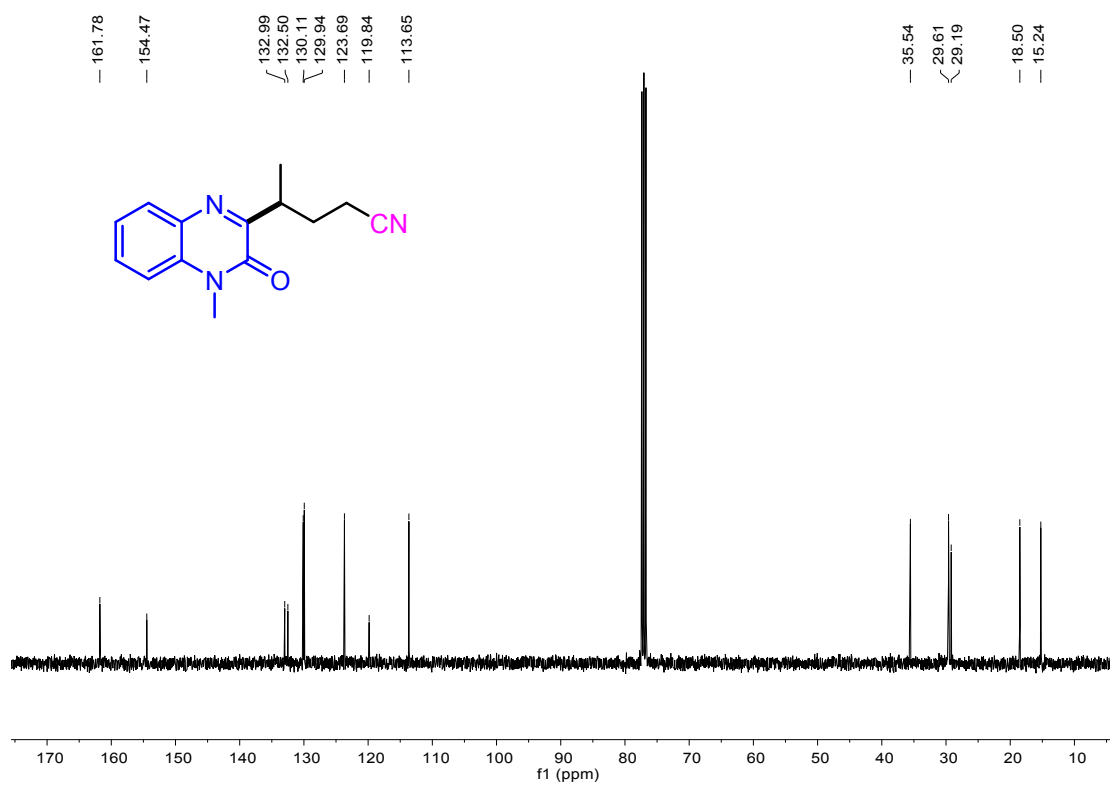

### <sup>1</sup>H NMR Spectrum of 3da

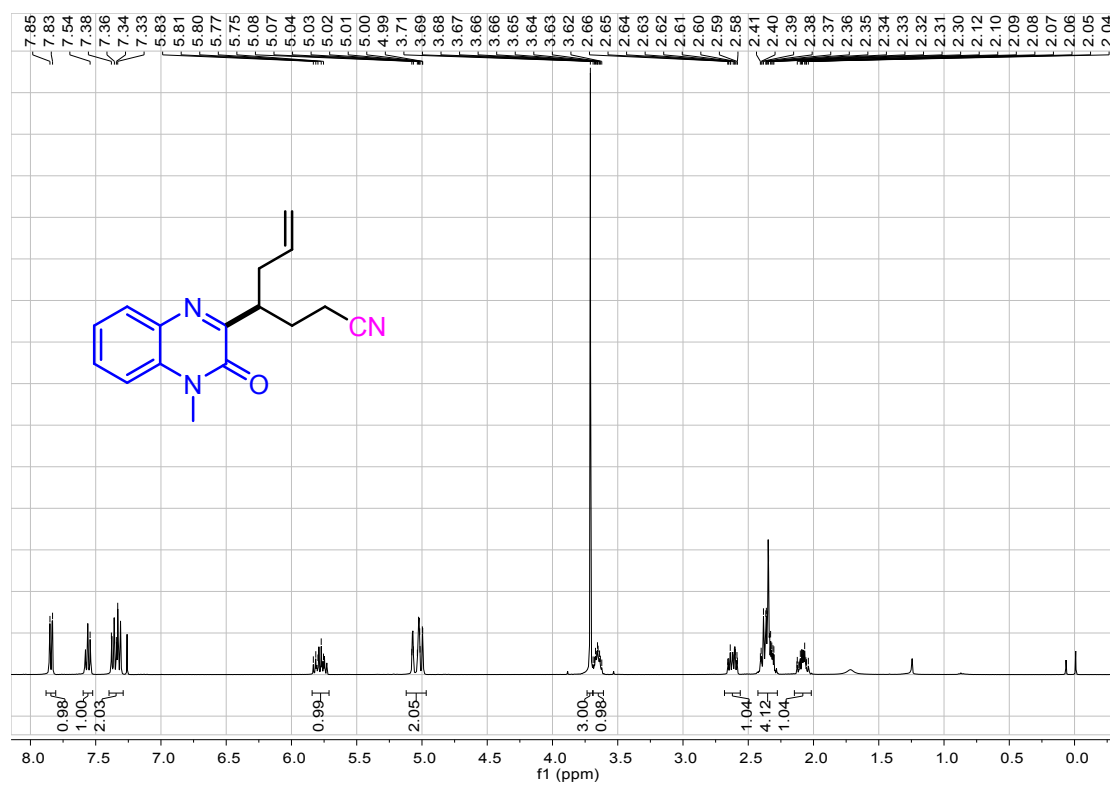

### <sup>13</sup>C NMR Spectrum of 3da

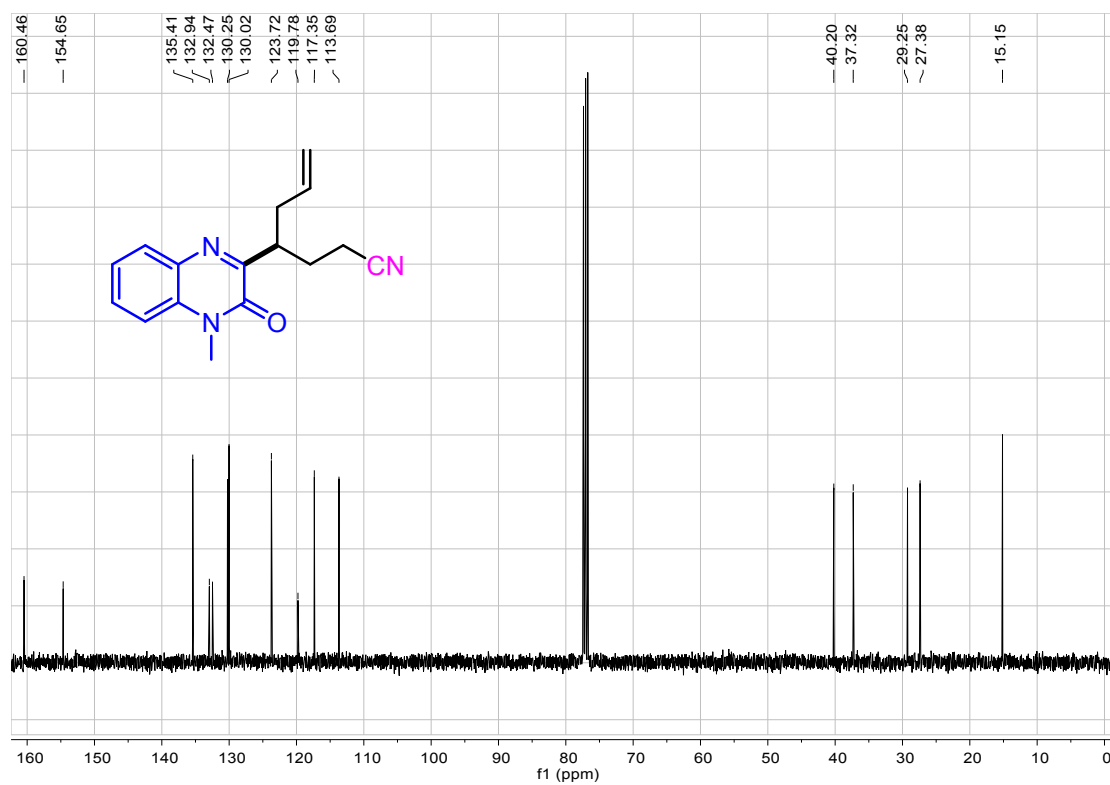

### <sup>1</sup>H NMR Spectrum of 3ea

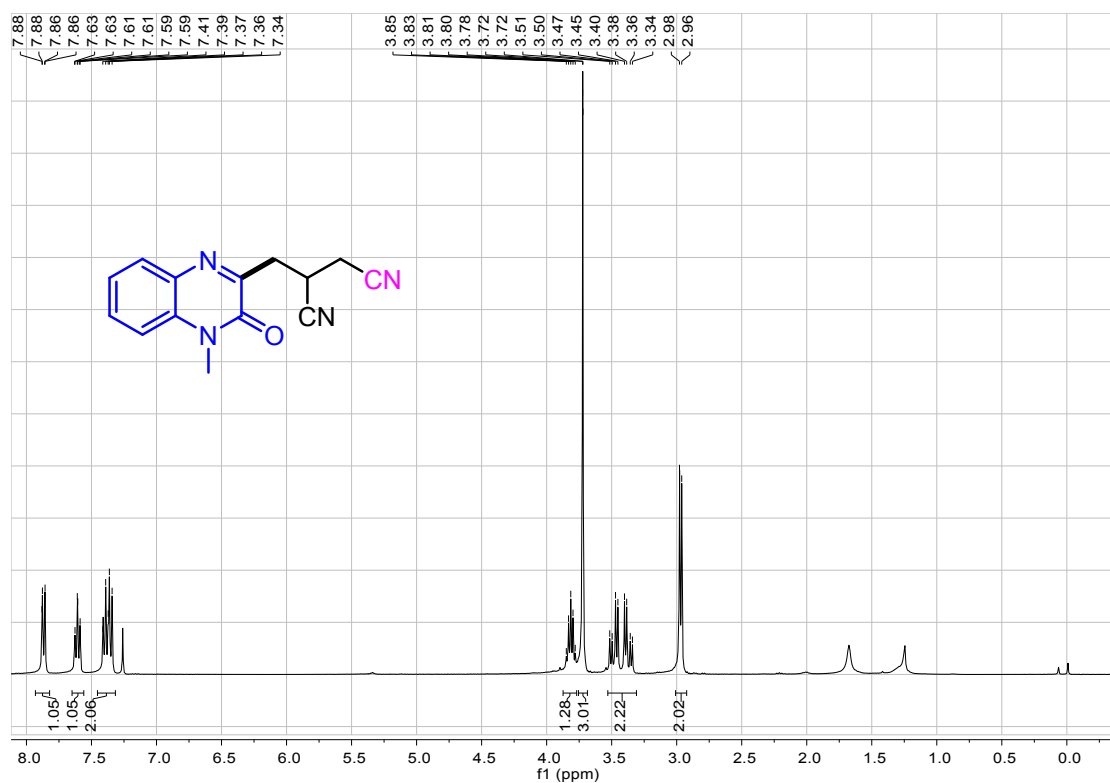

### <sup>13</sup>C NMR Spectrum of 3ea

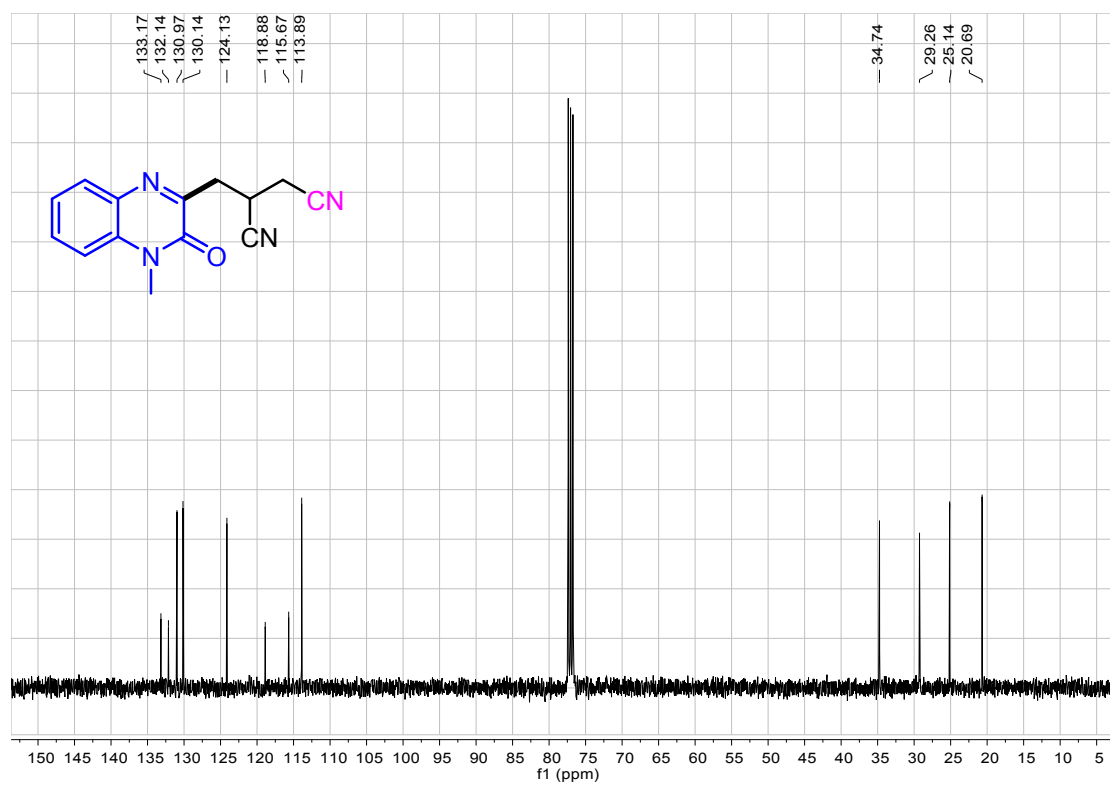

### <sup>1</sup>H NMR Spectrum of **3fa**

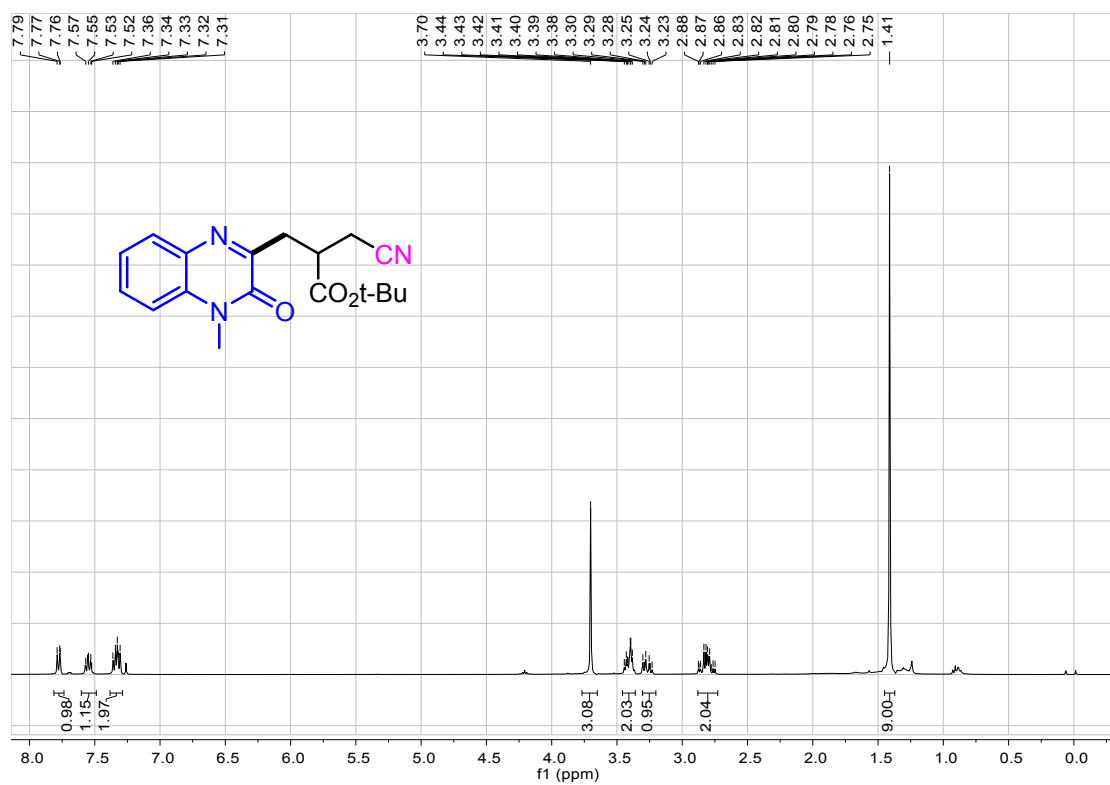

### <sup>13</sup>C NMR Spectrum of **3fa**

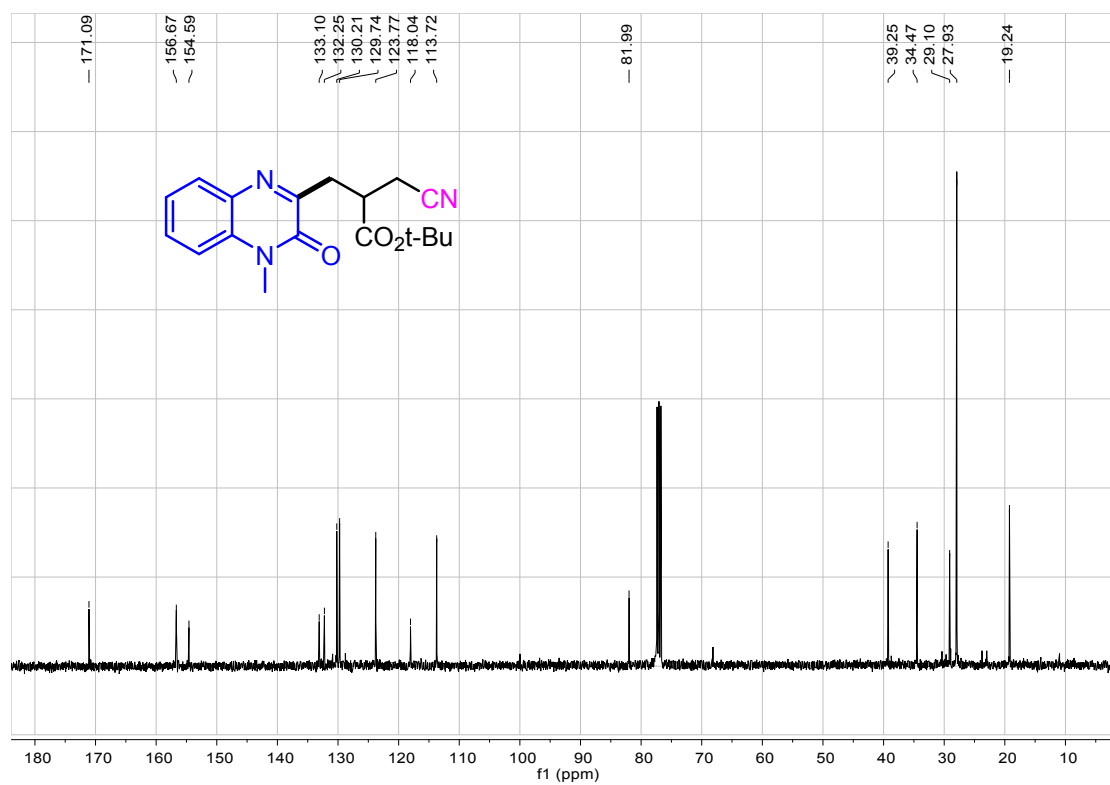



### <sup>1</sup>H NMR Spectrum of 3ga

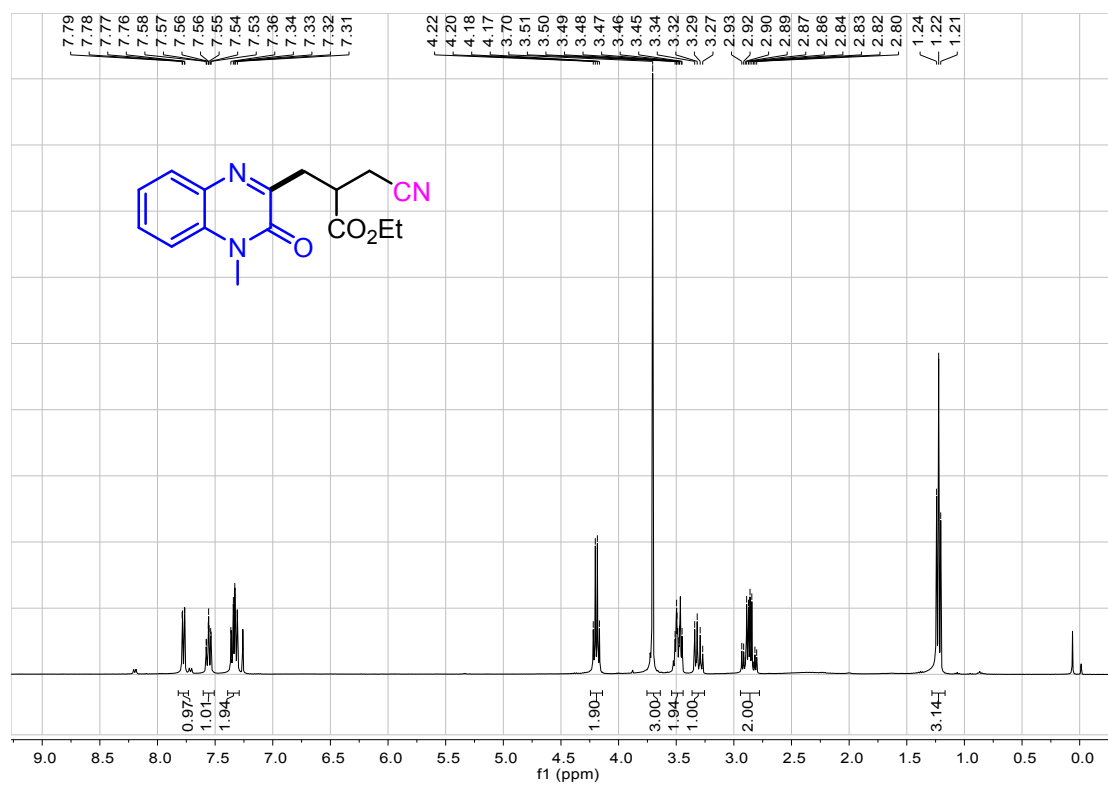

### <sup>13</sup>C NMR Spectrum of 3ga

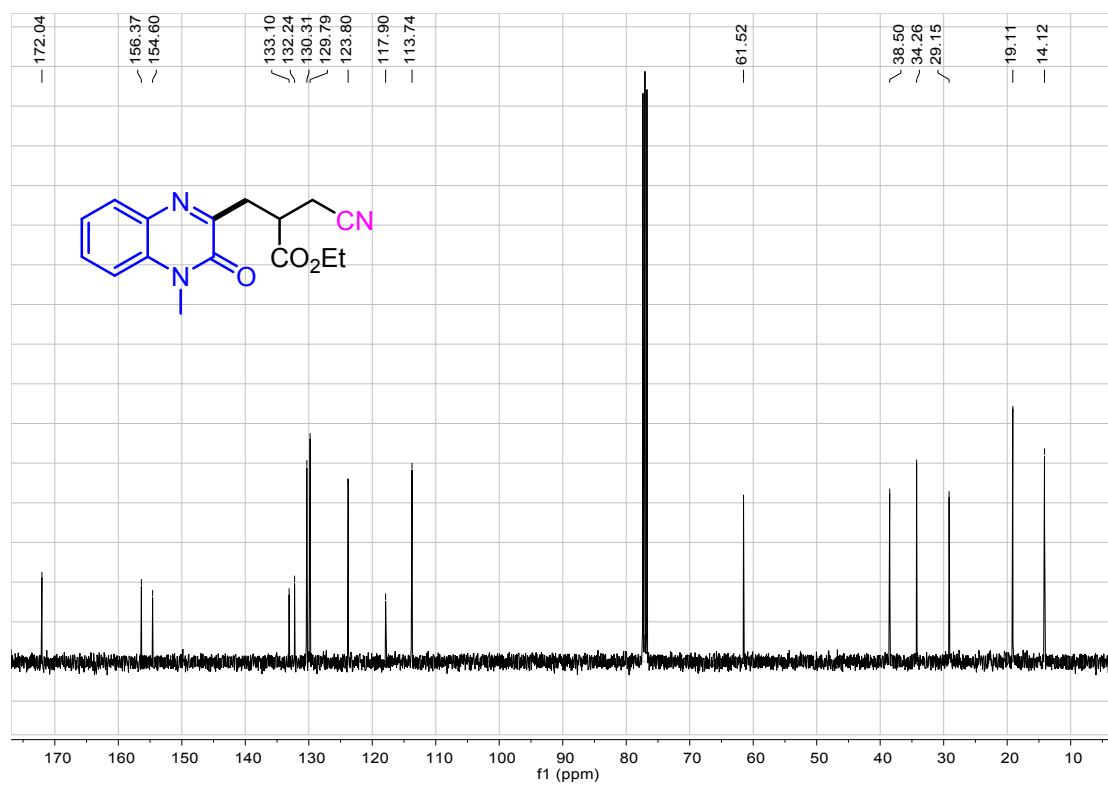

### <sup>1</sup>H NMR Spectrum of **3ha**

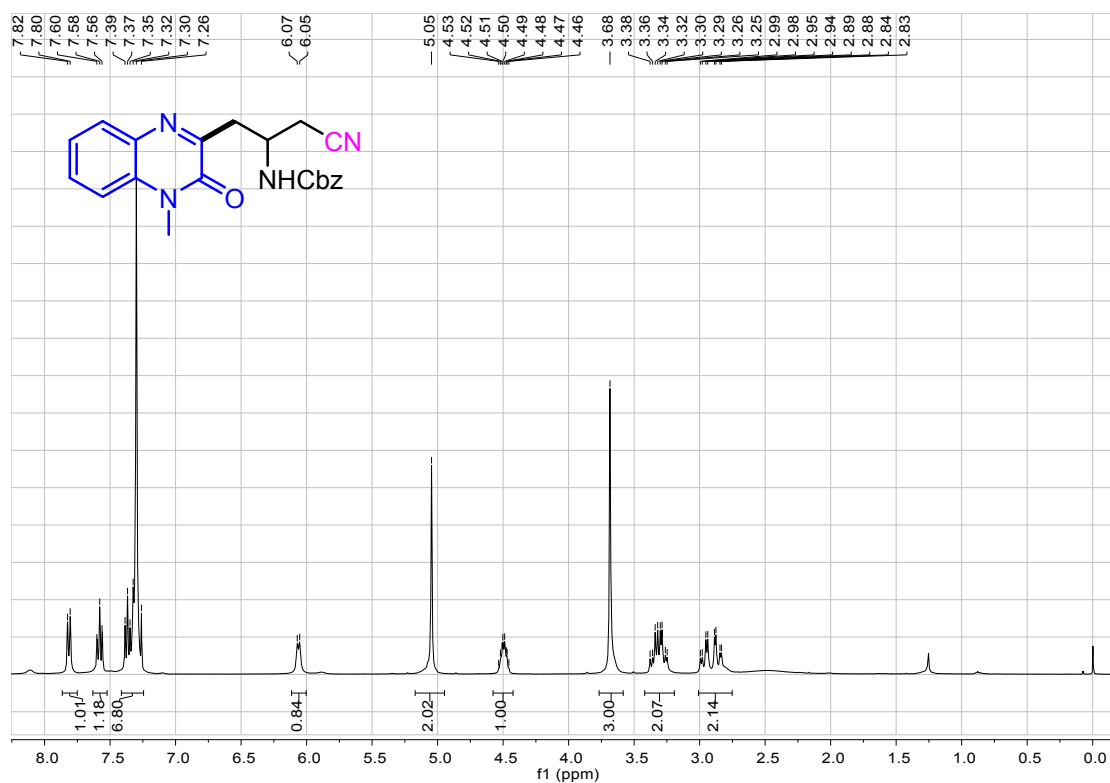

### <sup>13</sup>C NMR Spectrum of **3ha**

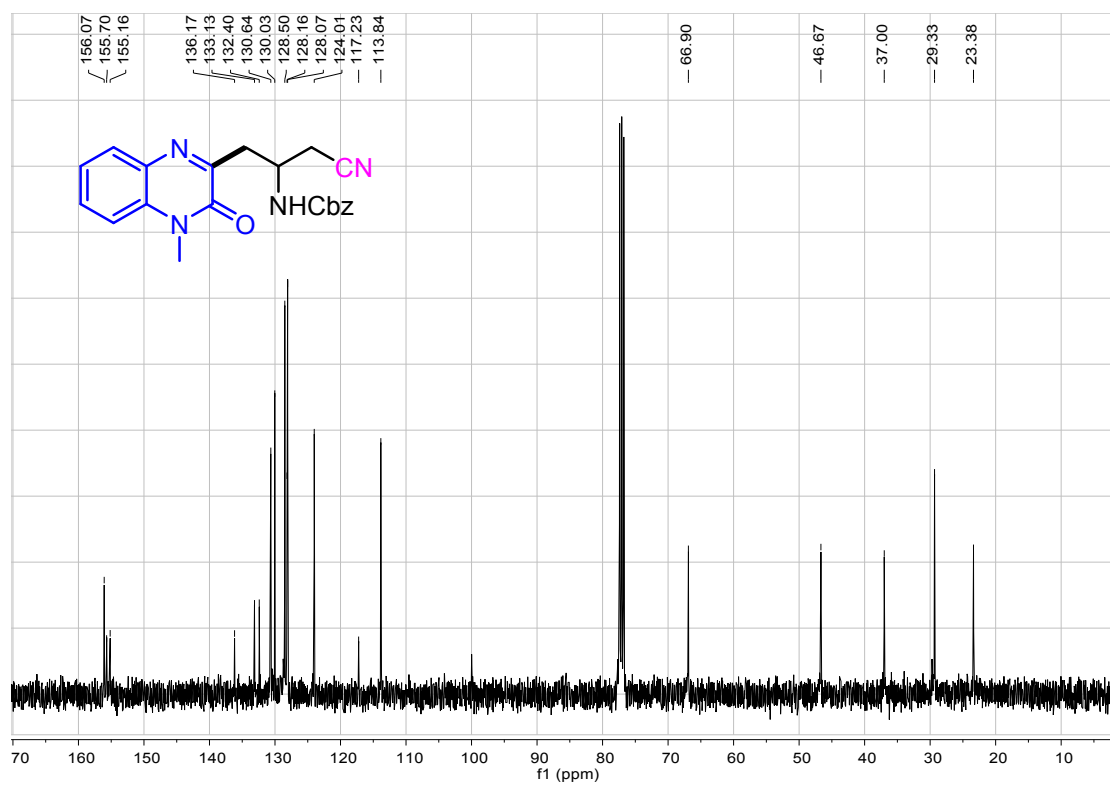

### <sup>1</sup>H NMR Spectrum of **3ia**

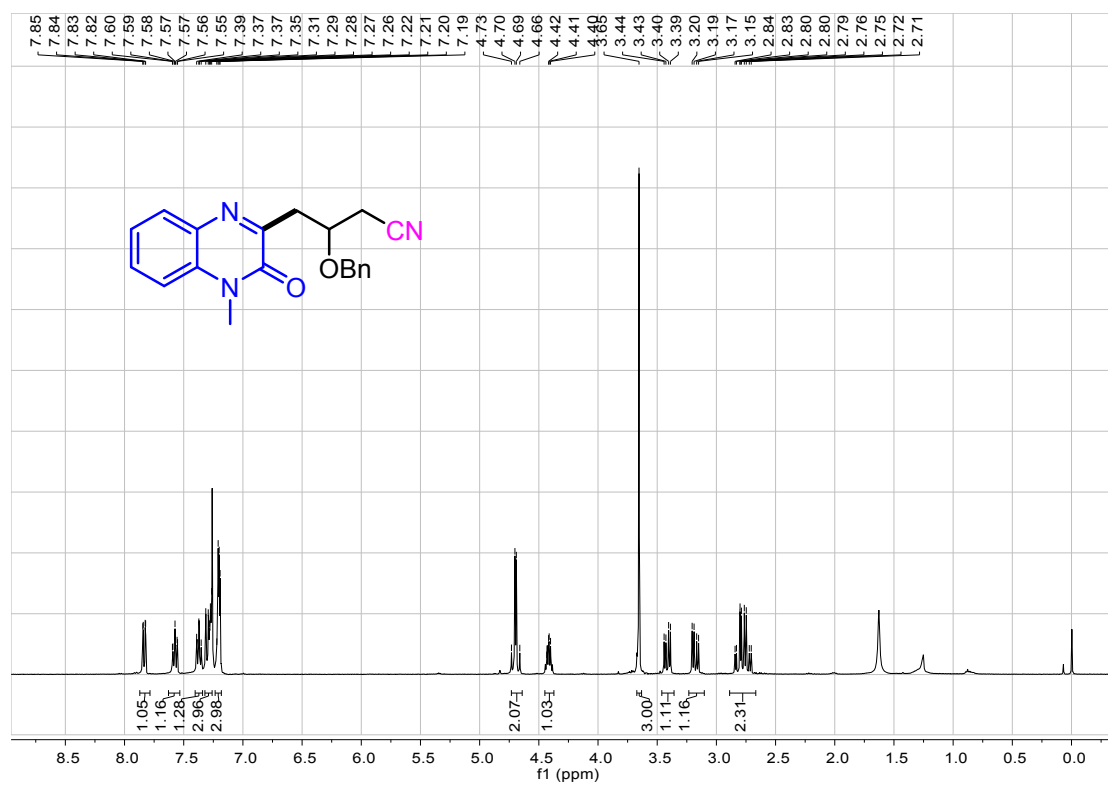

### <sup>13</sup>C NMR Spectrum of **3ia**

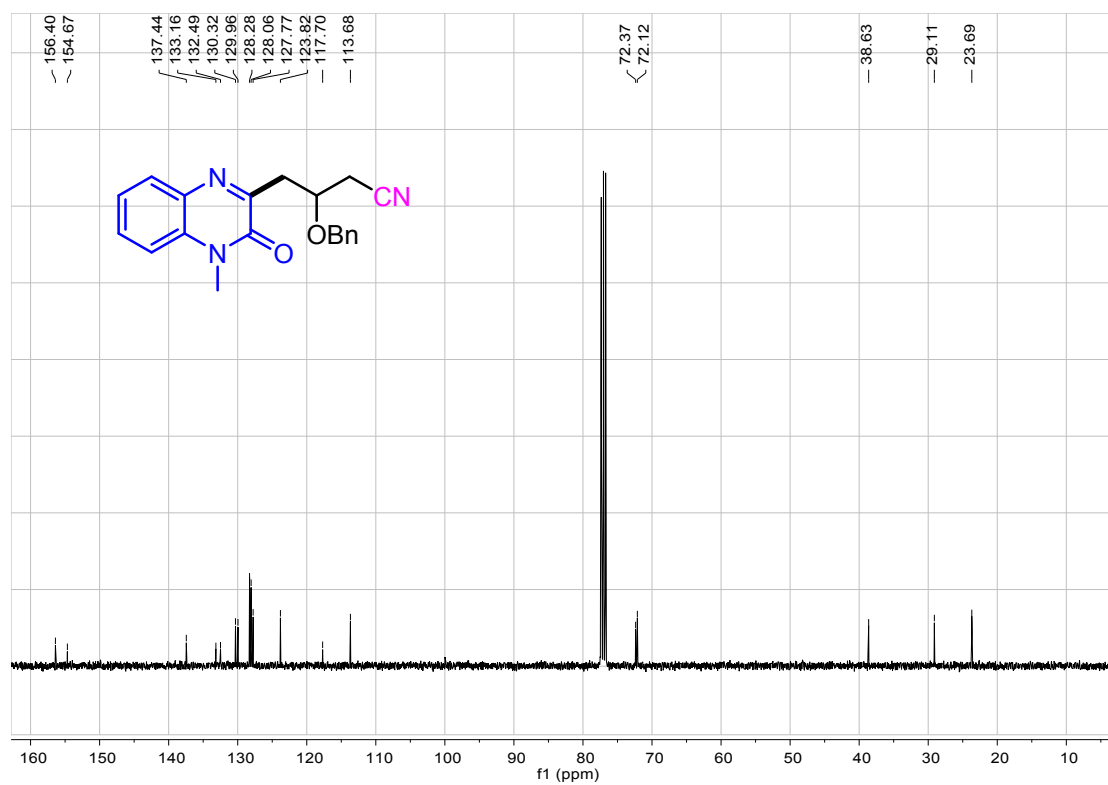

### <sup>1</sup>H NMR Spectrum of 3ja

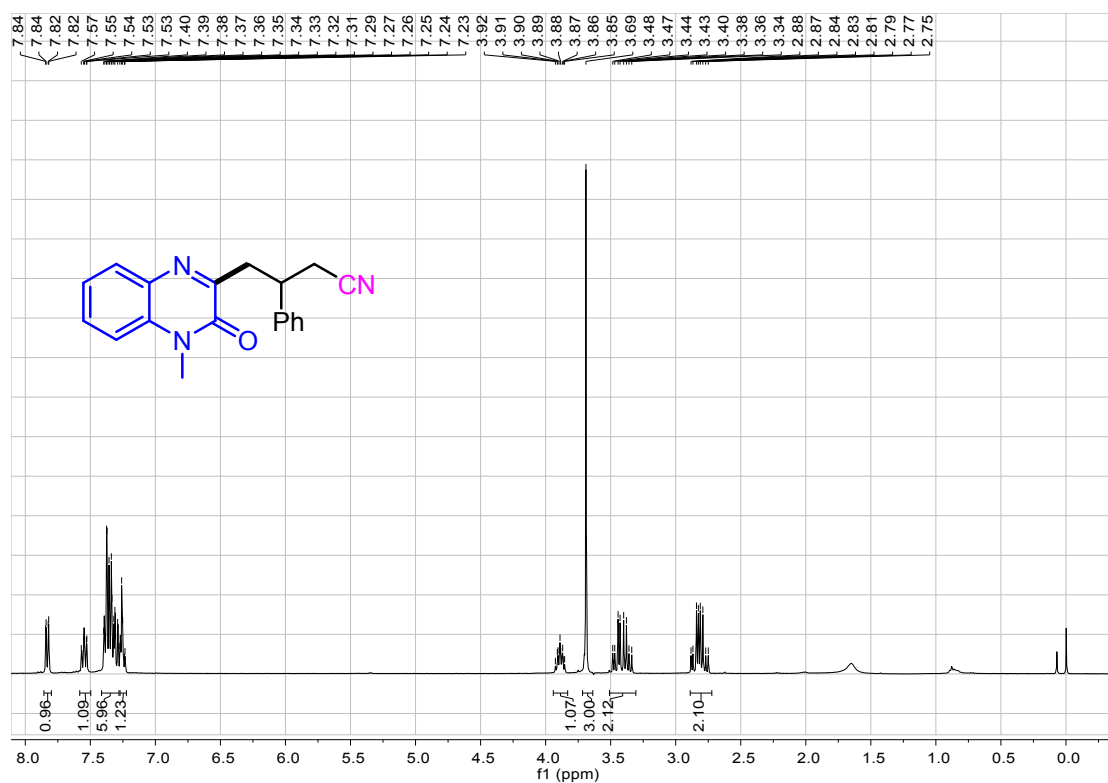

### <sup>13</sup>C NMR Spectrum of 3ja

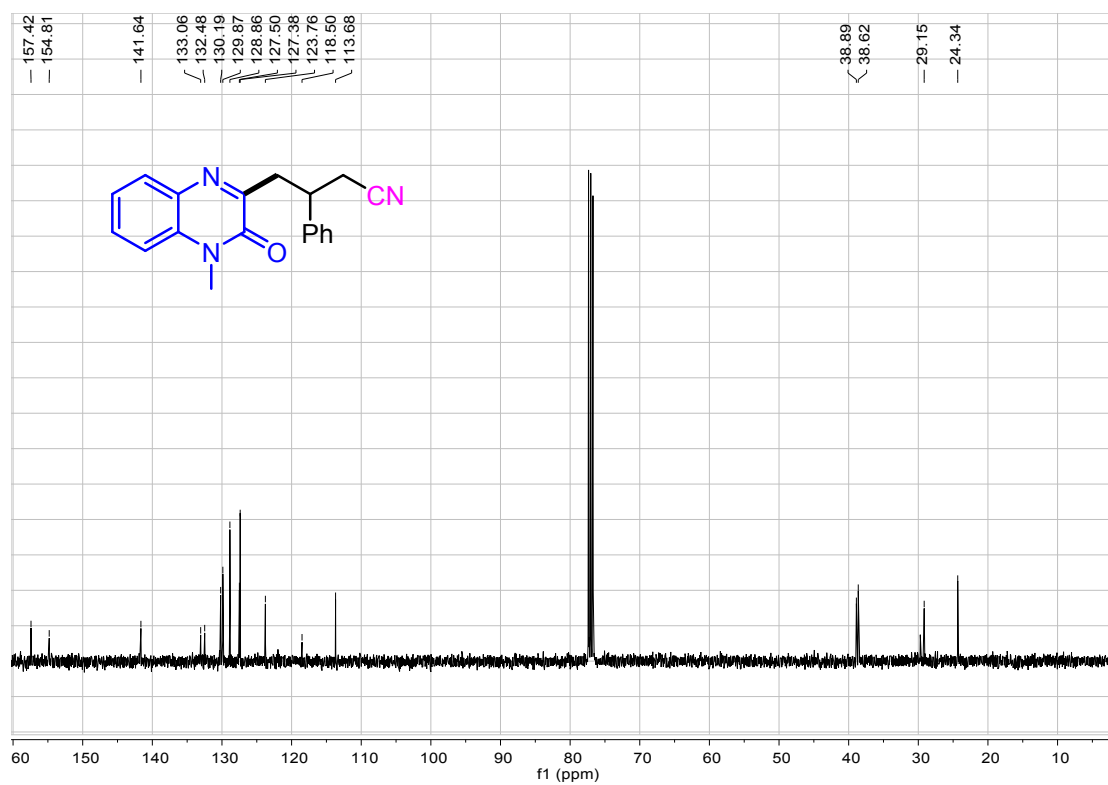

### <sup>1</sup>H NMR Spectrum of 3ka

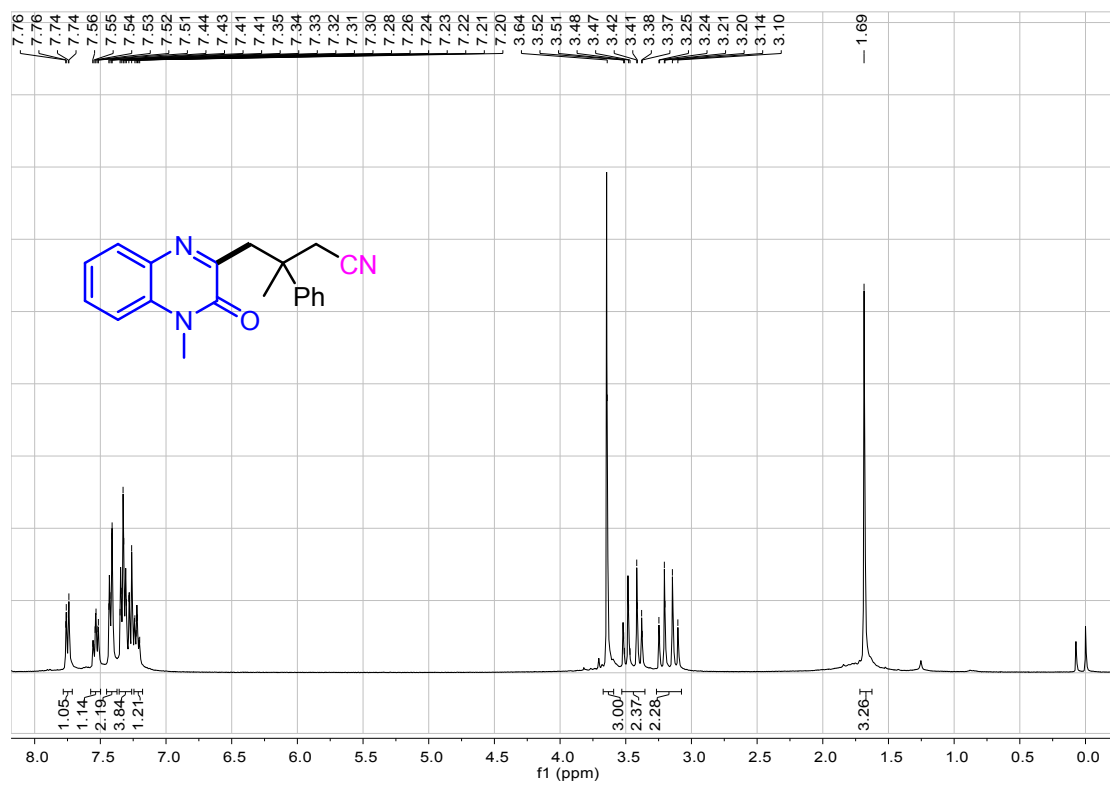

### <sup>13</sup>C NMR Spectrum of 3ka

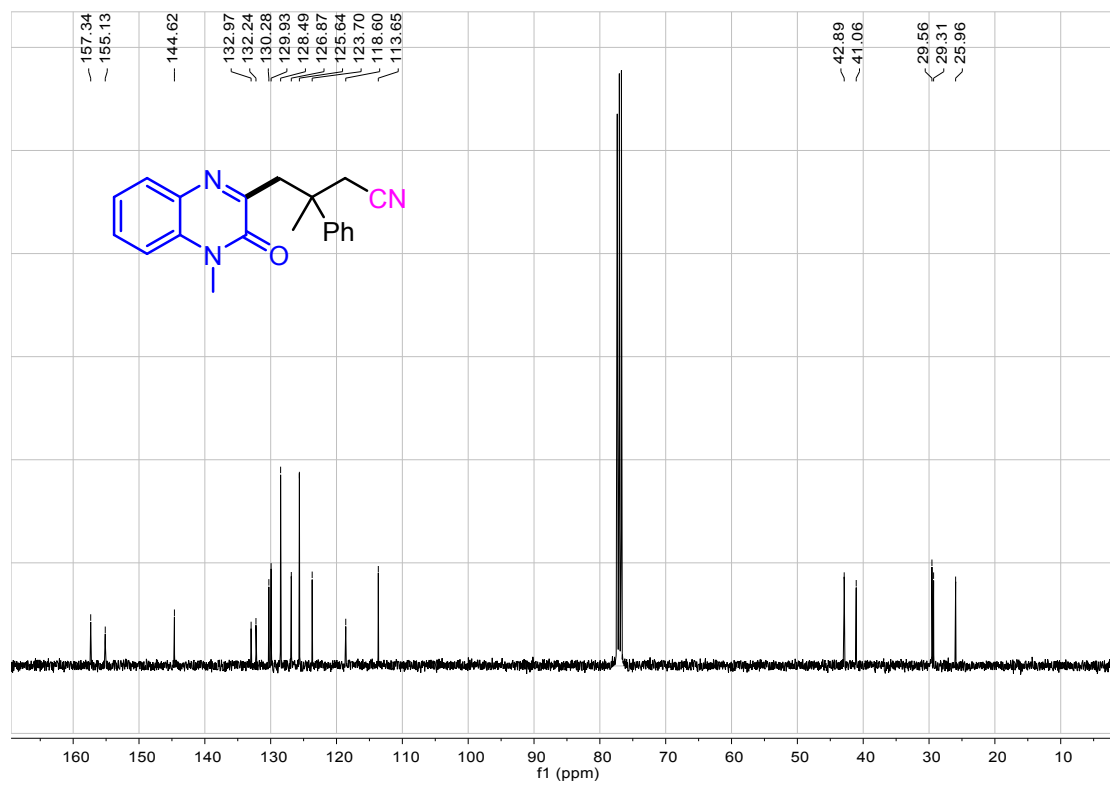

### <sup>1</sup>H NMR Spectrum of 3la

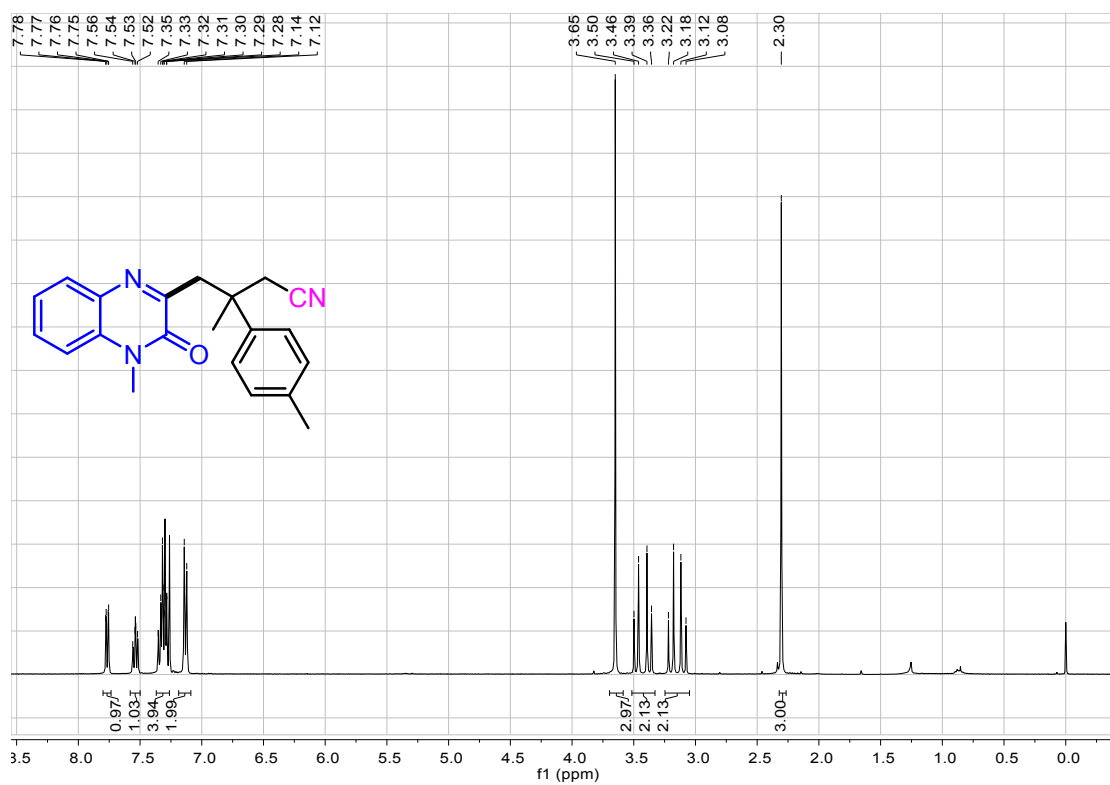

### <sup>13</sup>C NMR Spectrum of 3la

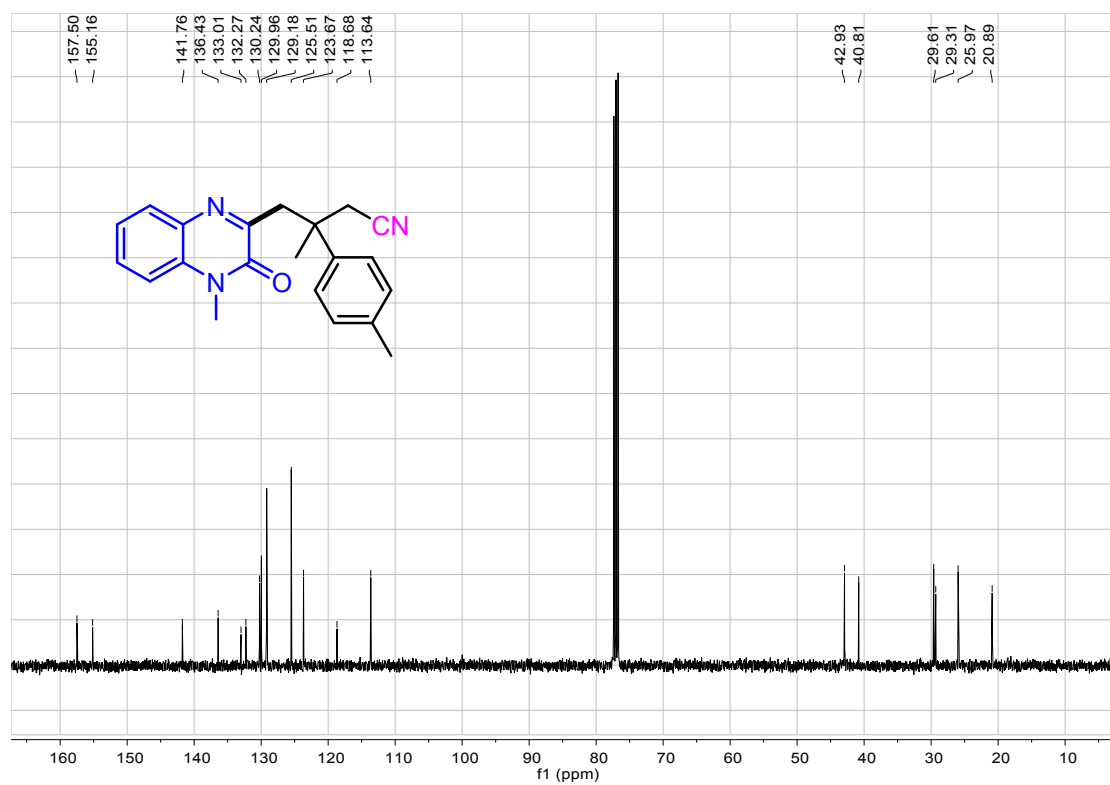

### <sup>1</sup>H NMR Spectrum of **3ma**

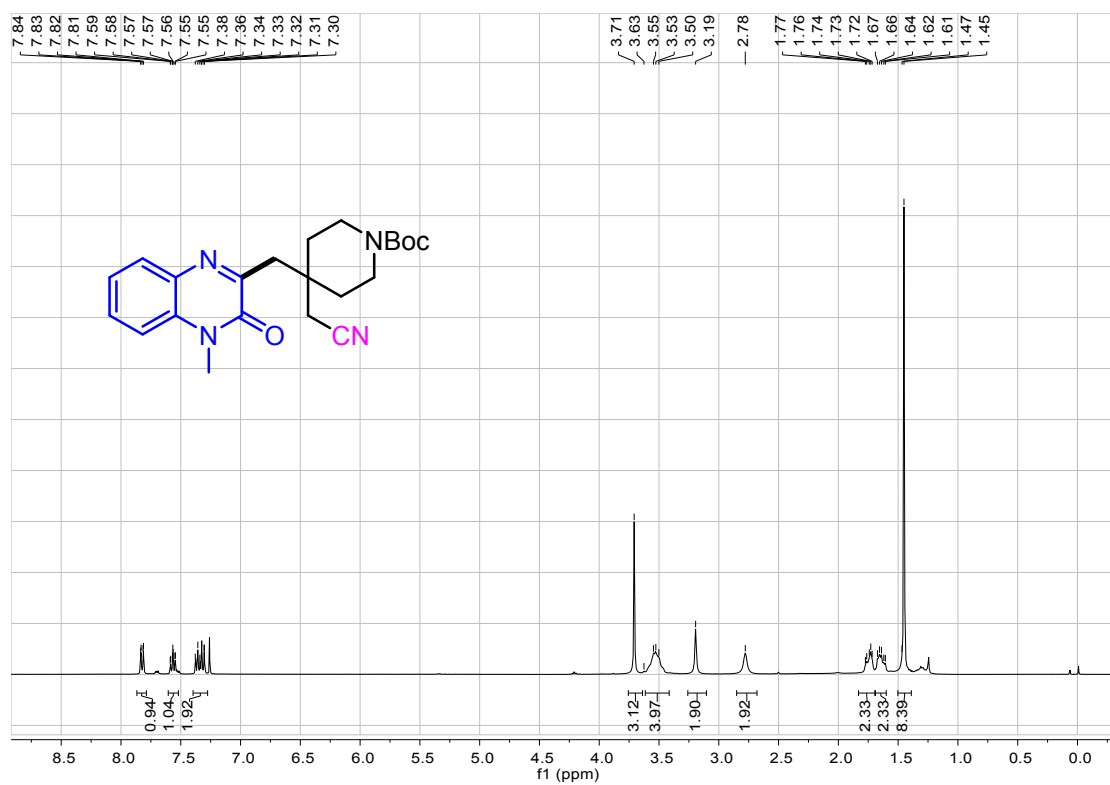

### <sup>13</sup>C NMR Spectrum of **3ma**

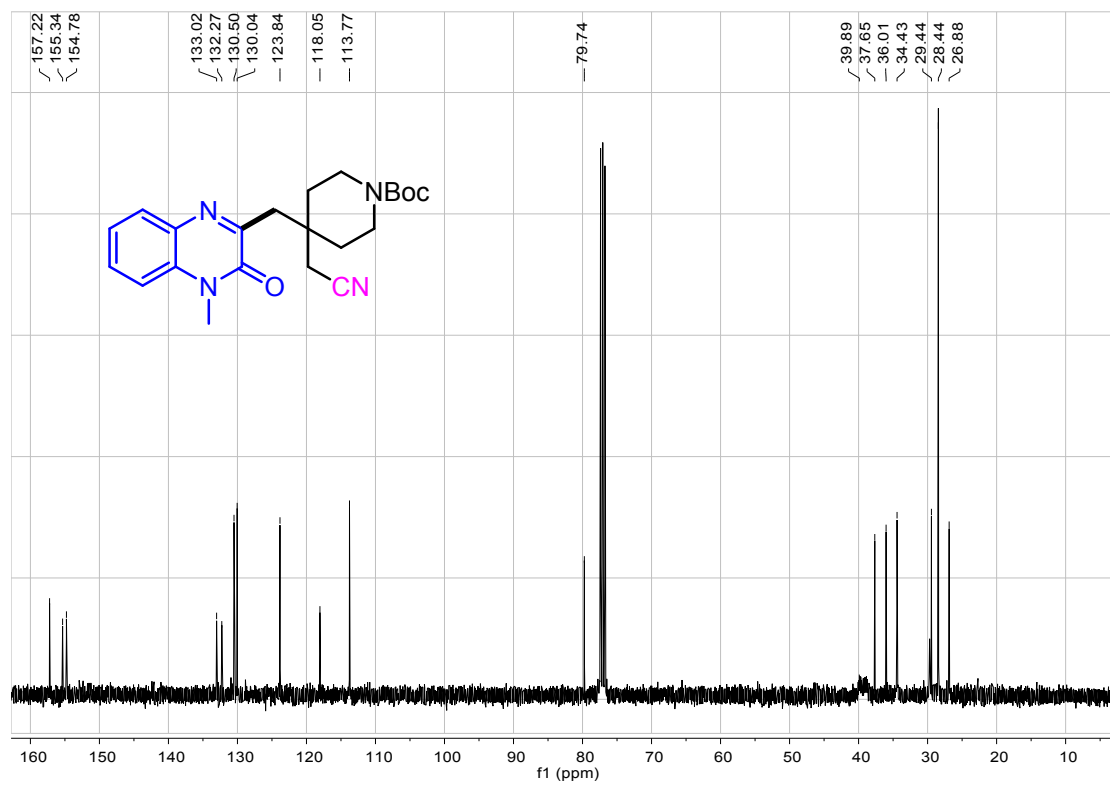

### <sup>1</sup>H NMR Spectrum of **3na**

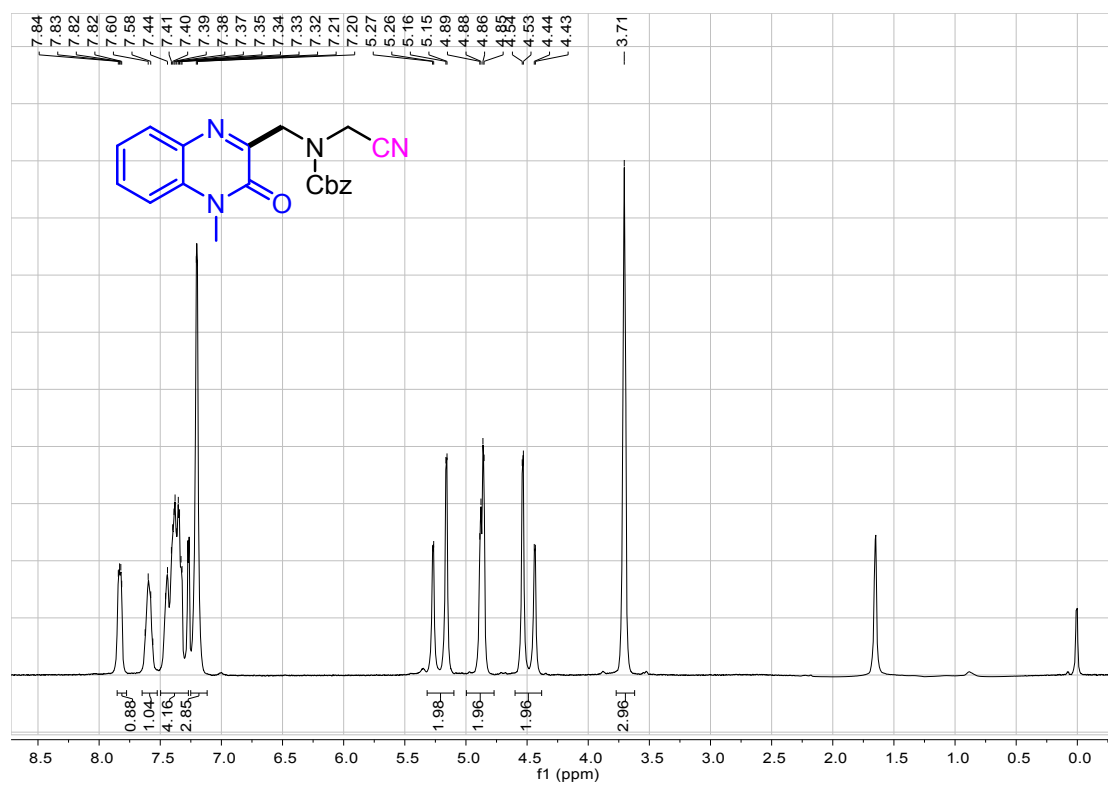

### <sup>13</sup>C NMR Spectrum of **3na**

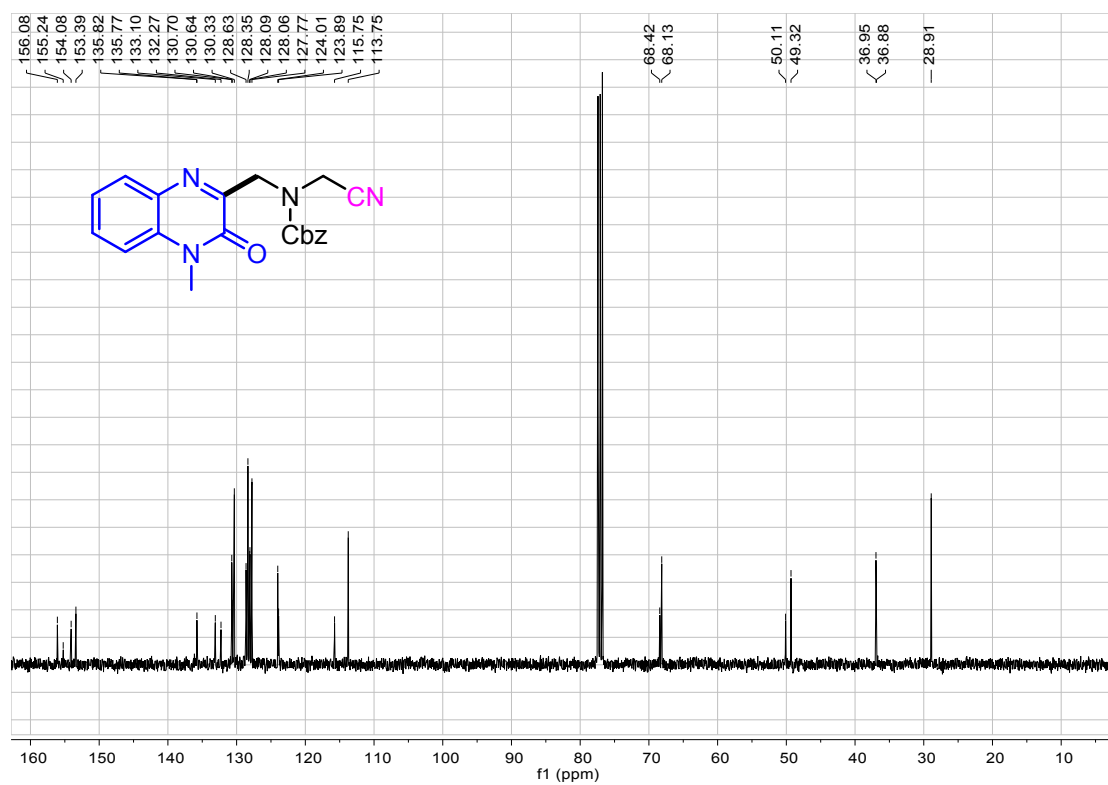



### <sup>1</sup>H NMR Spectrum of 30a

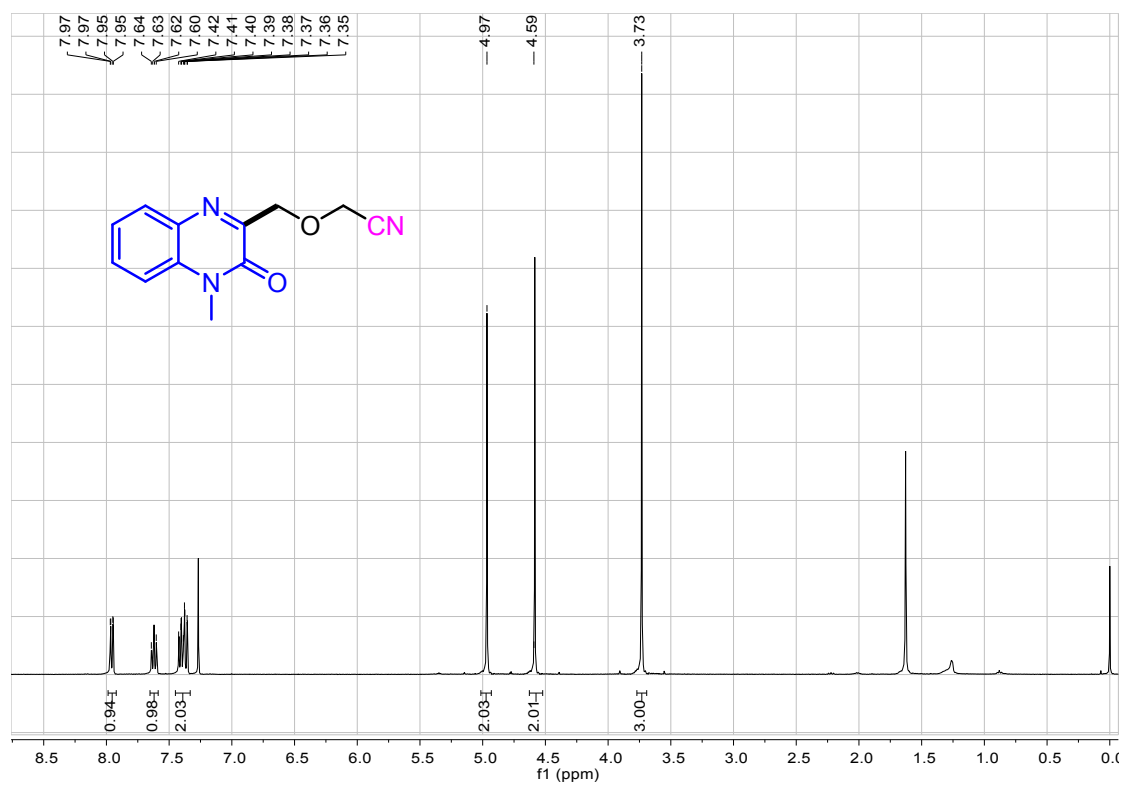

### <sup>13</sup>C NMR Spectrum of 40

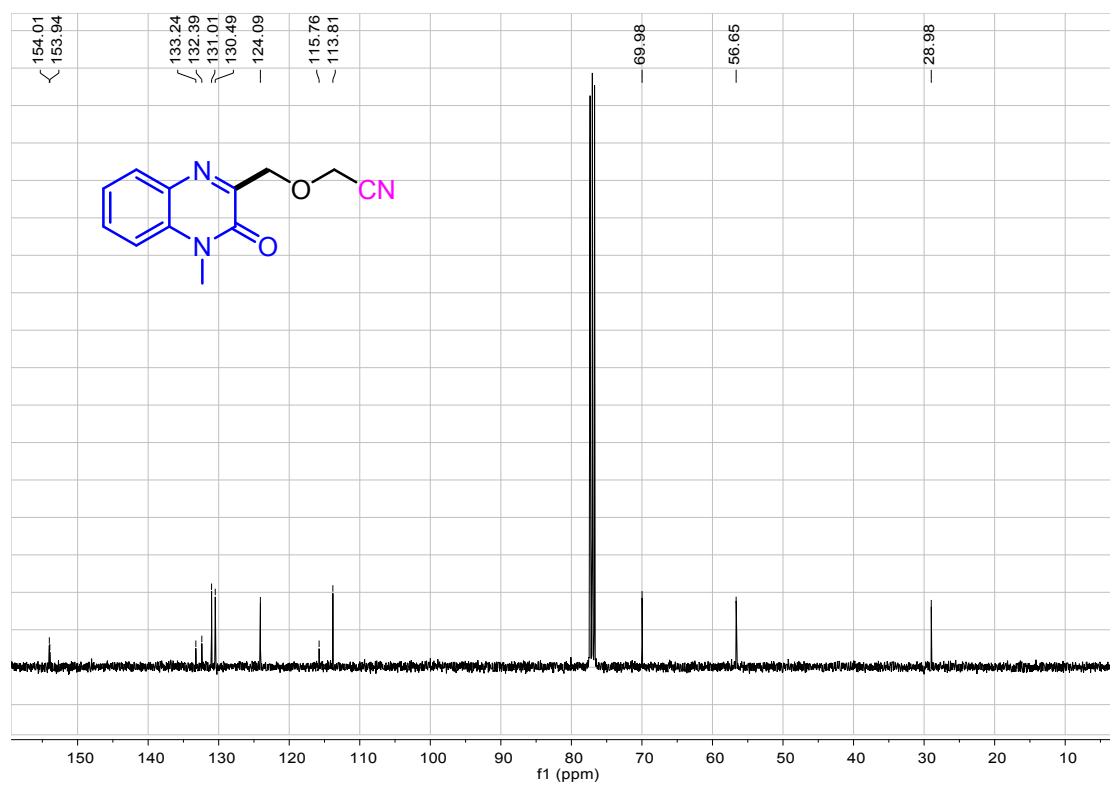

### <sup>1</sup>H NMR Spectrum of 3pa

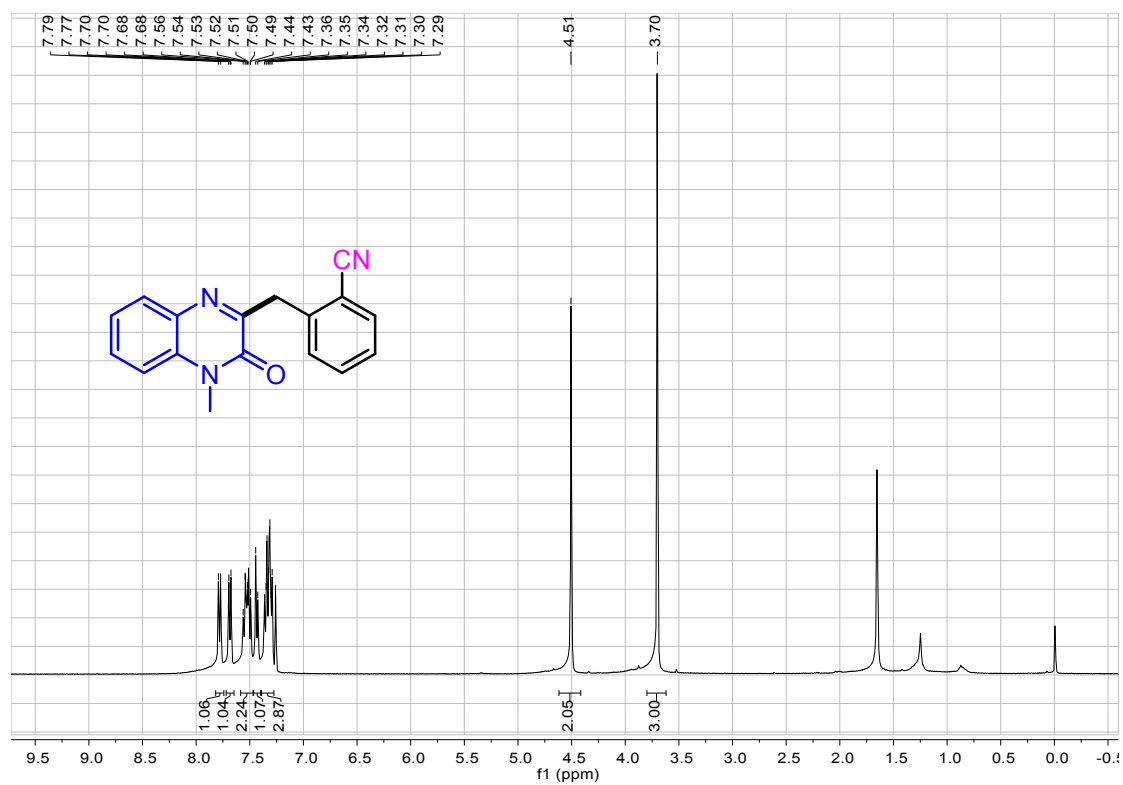

### <sup>13</sup>C NMR Spectrum of 4p

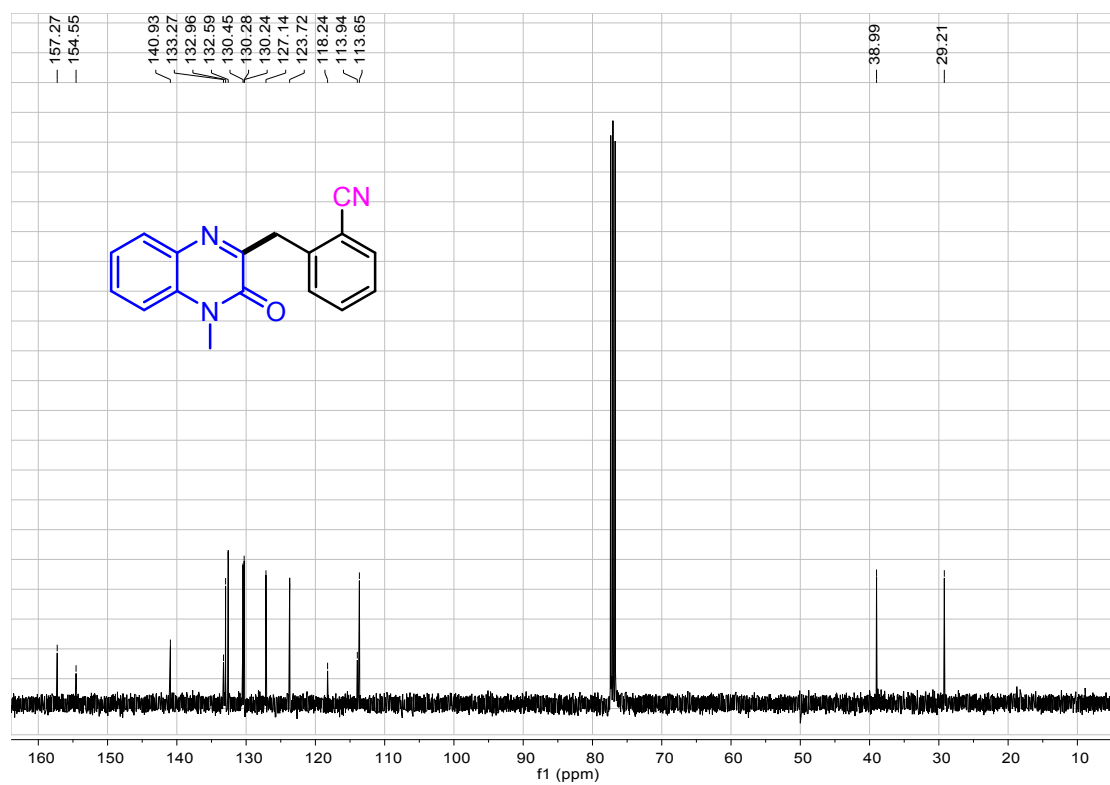

### <sup>1</sup>H NMR Spectrum of **5a**

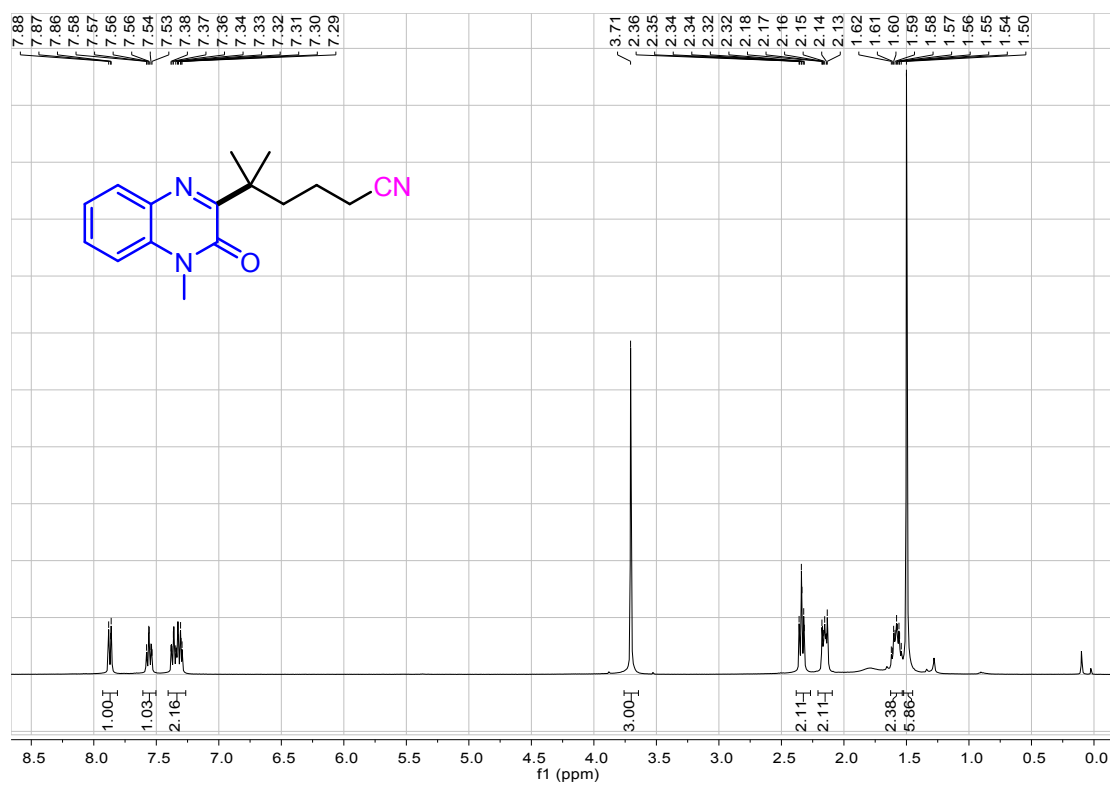

### <sup>13</sup>C NMR Spectrum of **5a**

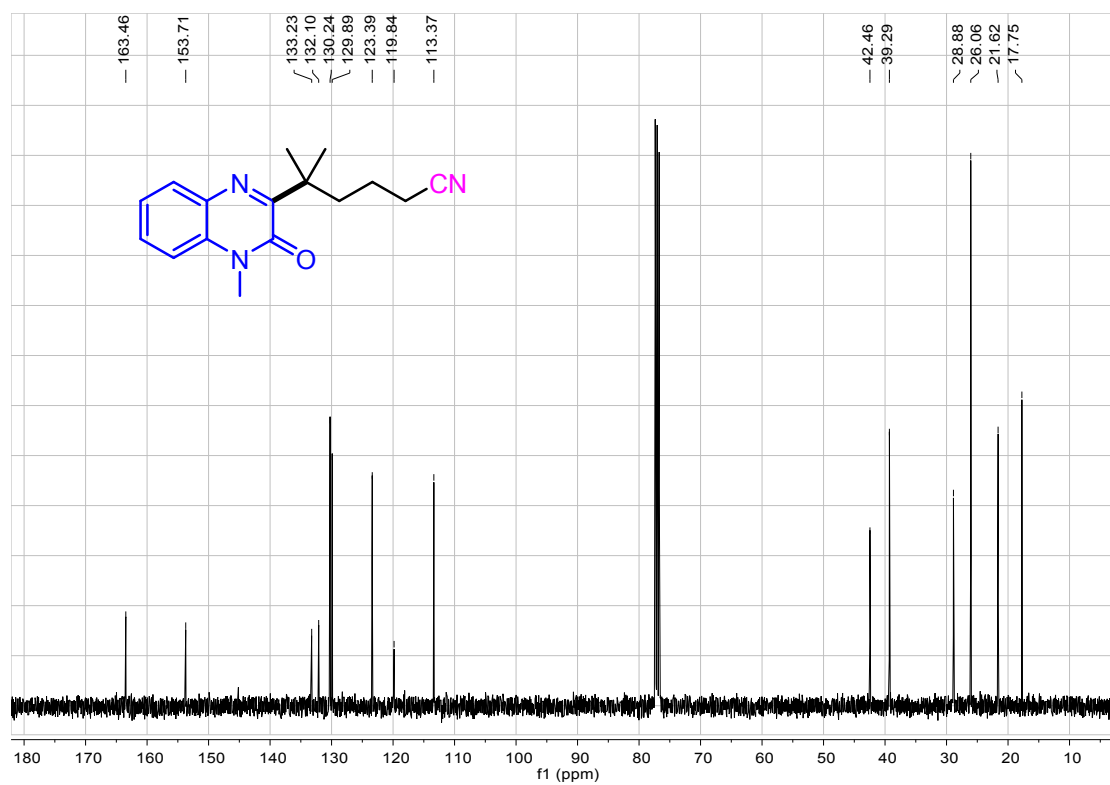

### <sup>1</sup>H NMR Spectrum of **5b**

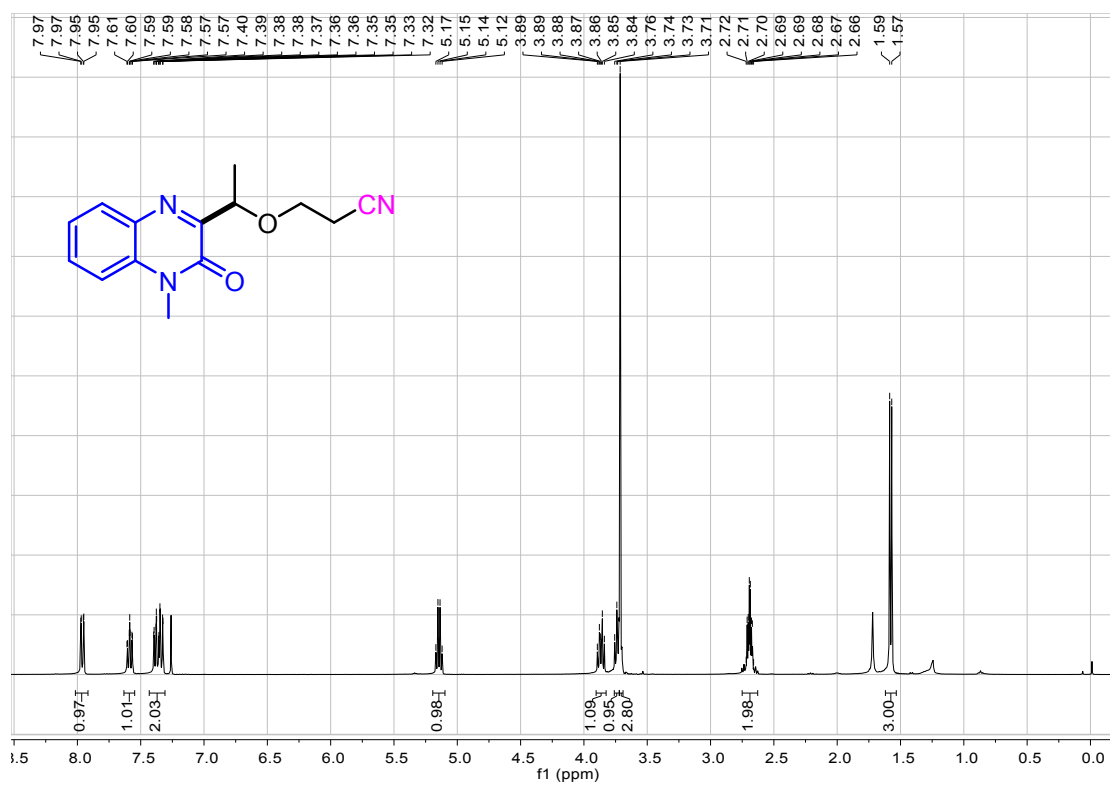

### <sup>13</sup>C NMR Spectrum of **5b**

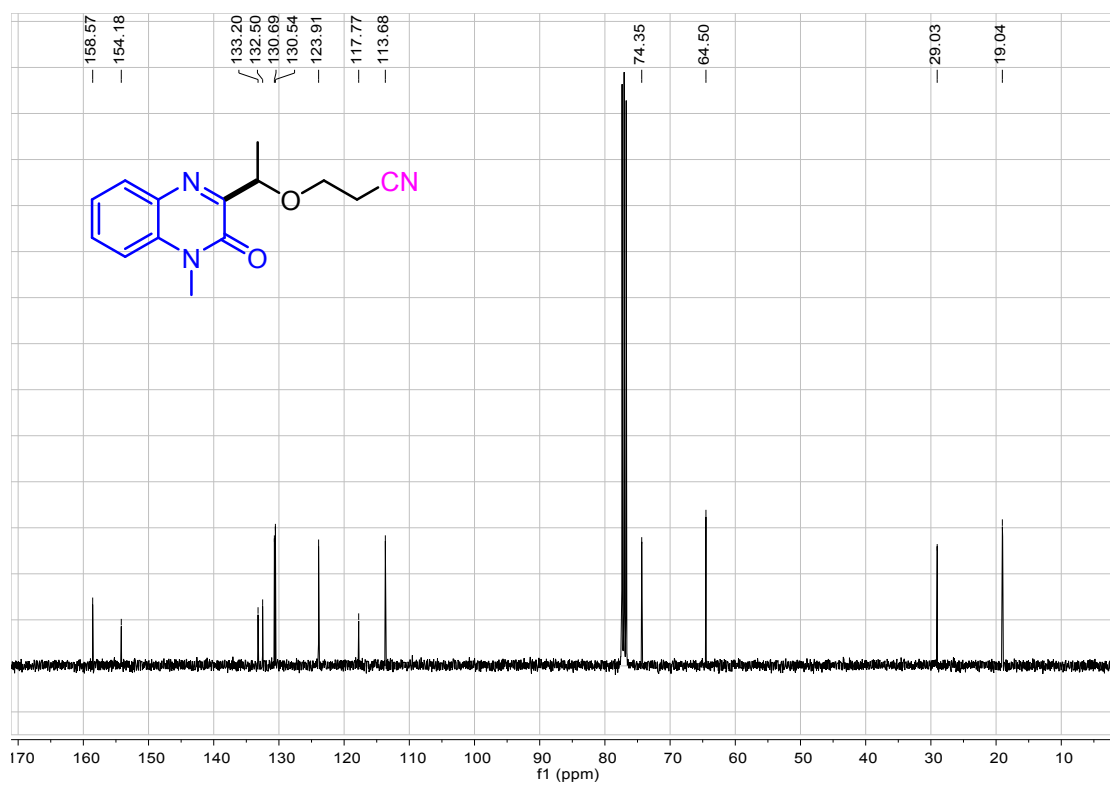

### <sup>1</sup>H NMR Spectrum of **5c**

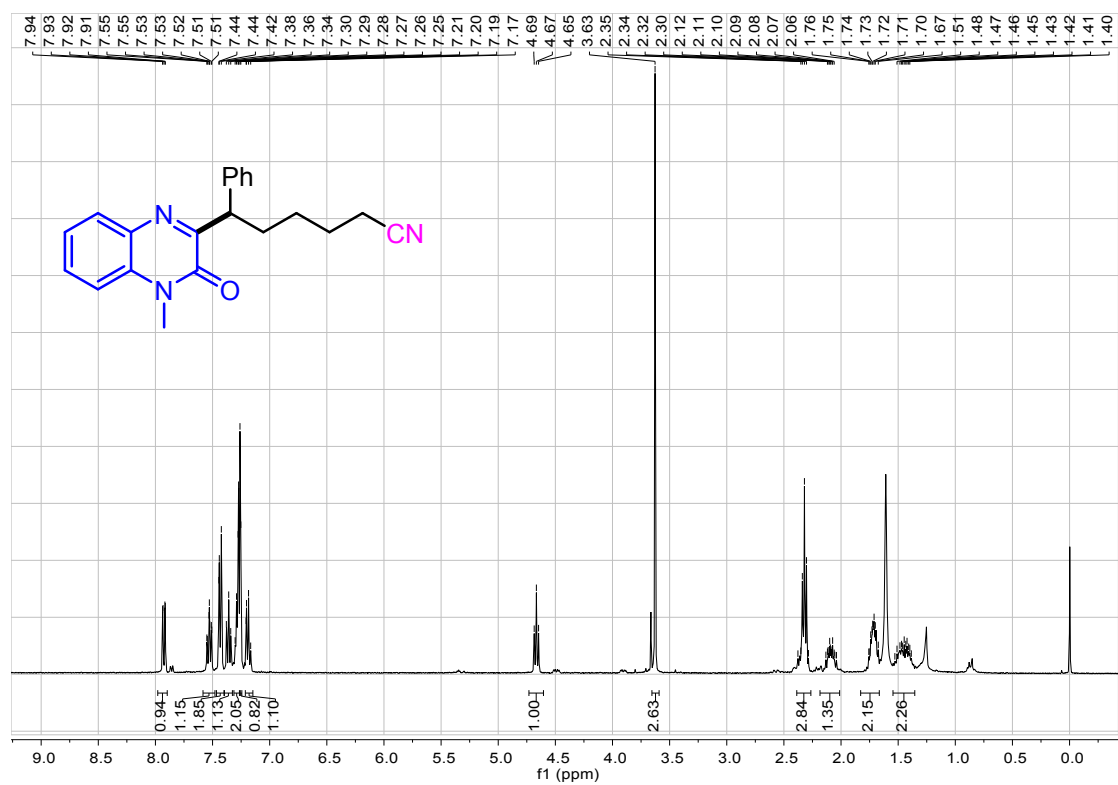

### <sup>13</sup>C NMR Spectrum of **5c**

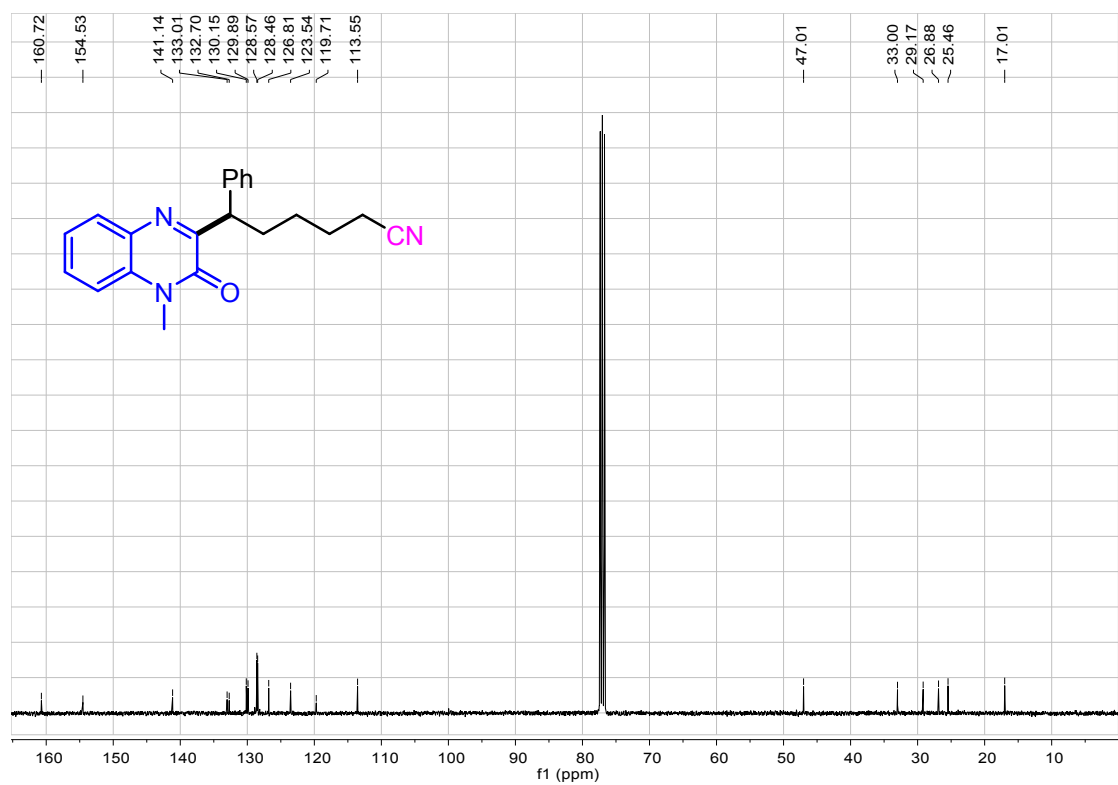

### <sup>1</sup>H NMR Spectrum of 5d

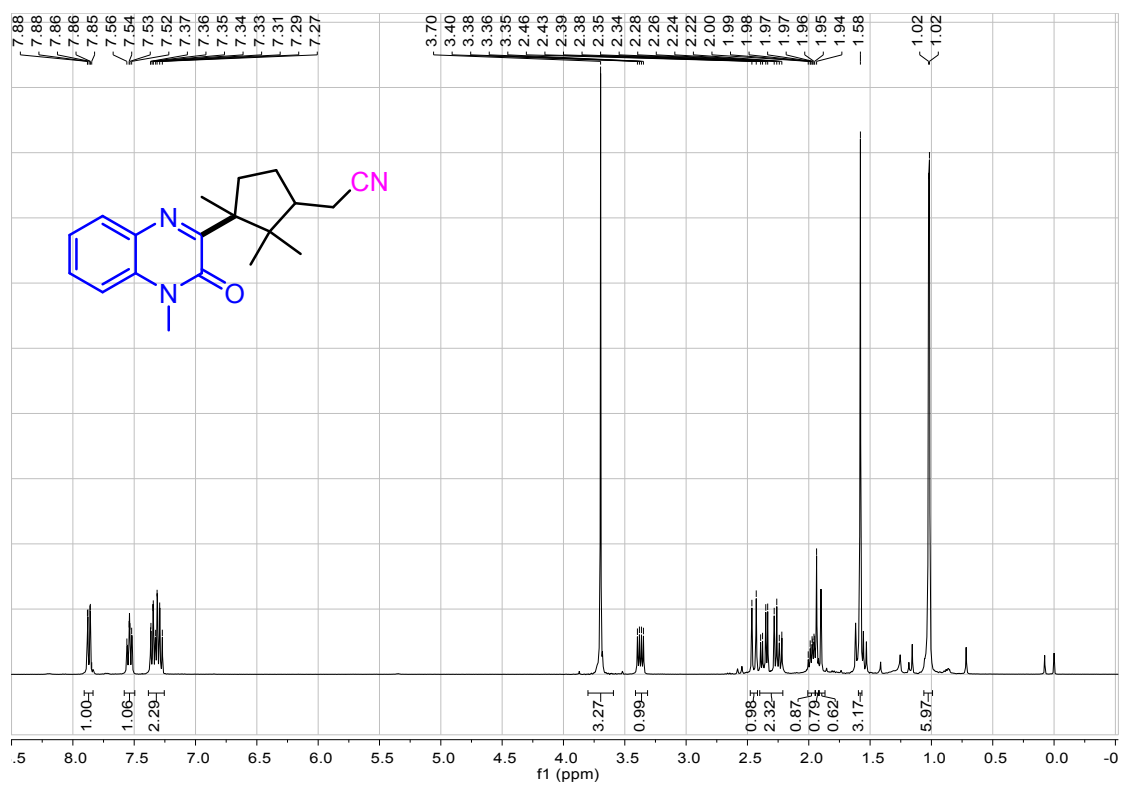

### <sup>13</sup>C NMR Spectrum of 5d

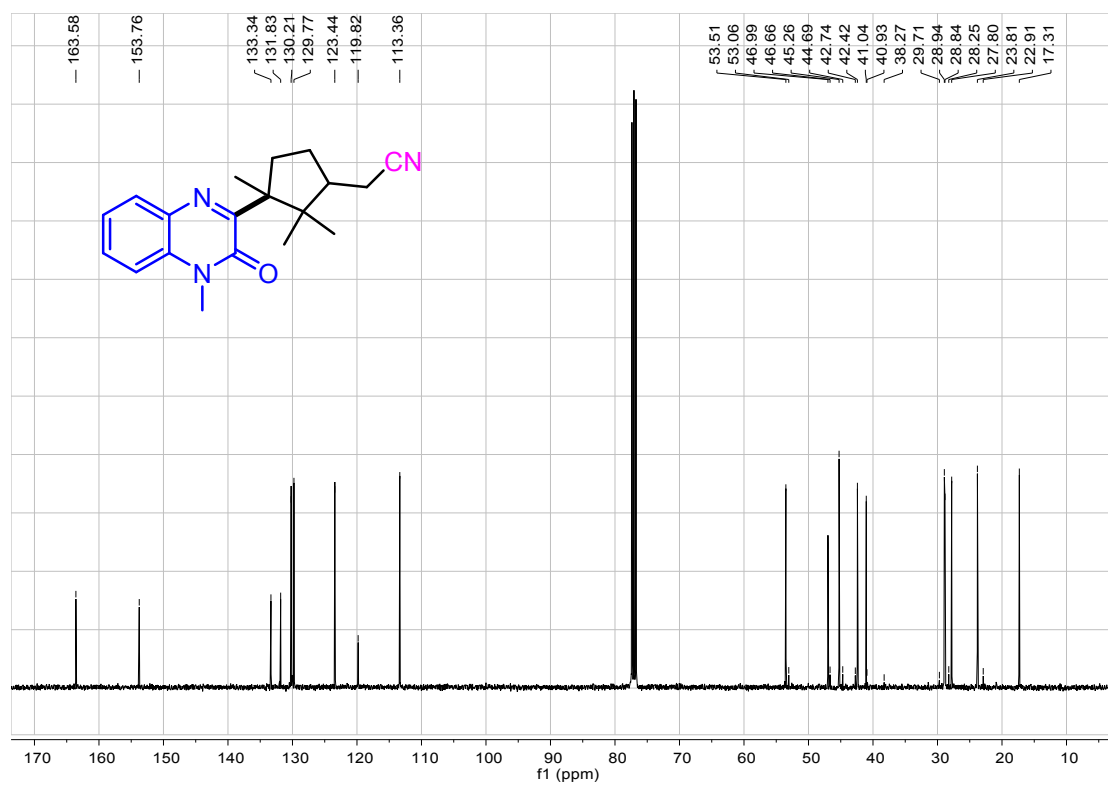

### <sup>1</sup>H NMR Spectrum of 7a

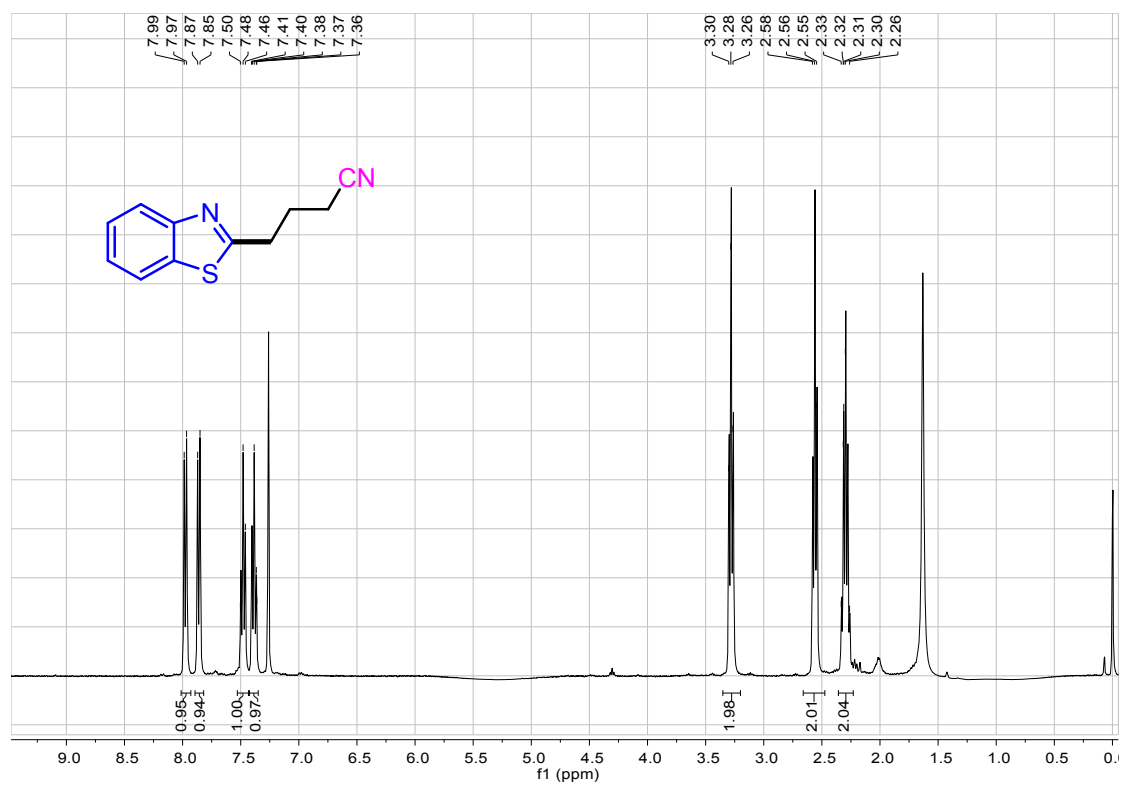

### <sup>13</sup>C NMR Spectrum of 7a

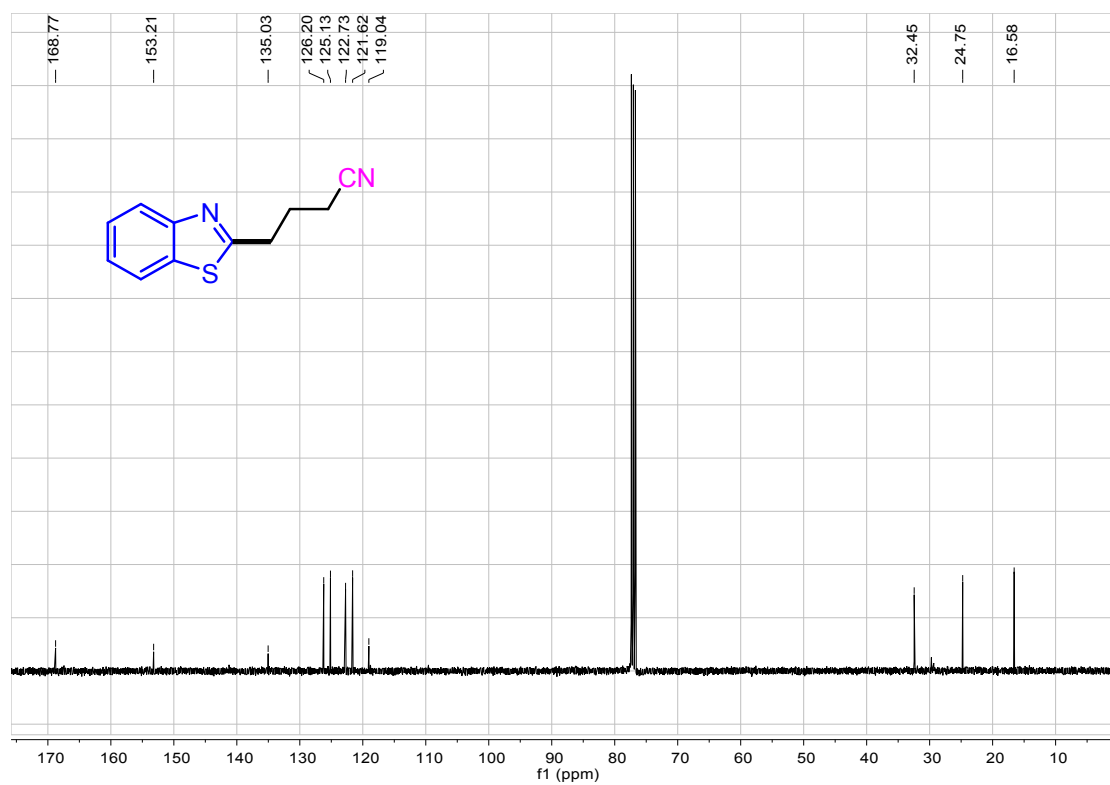

### <sup>1</sup>H NMR Spectrum of 7b

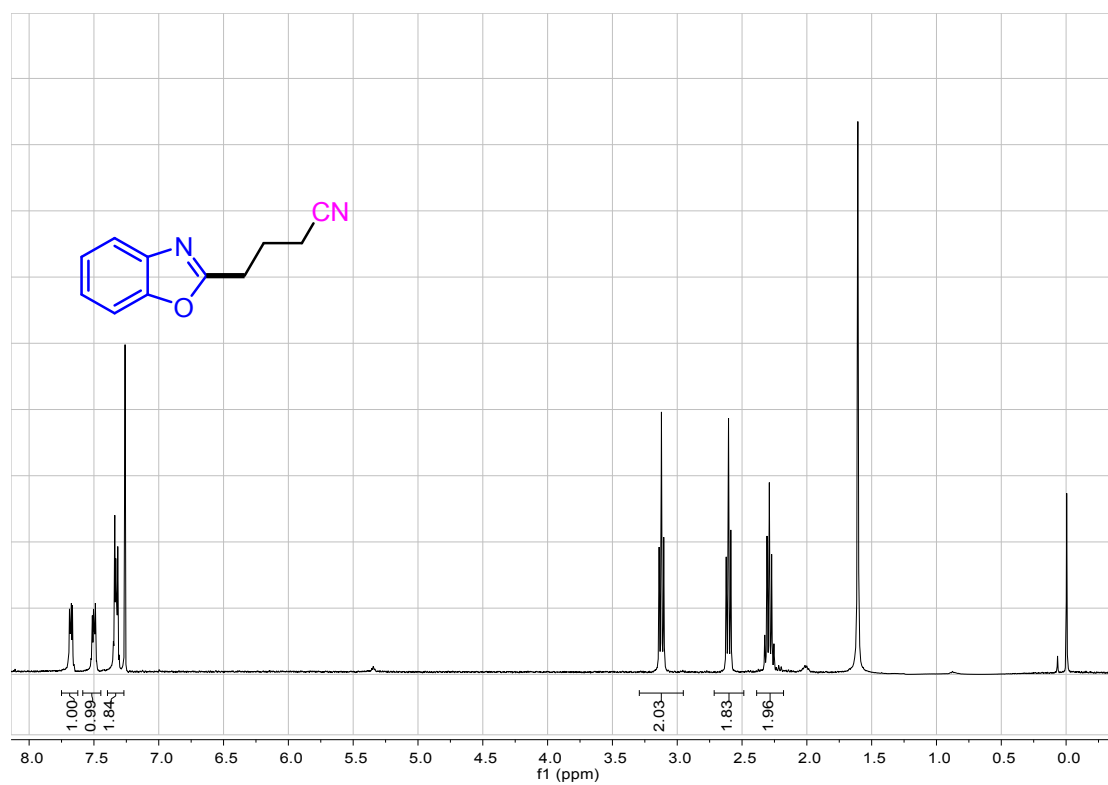

### <sup>13</sup>C NMR Spectrum of 7b

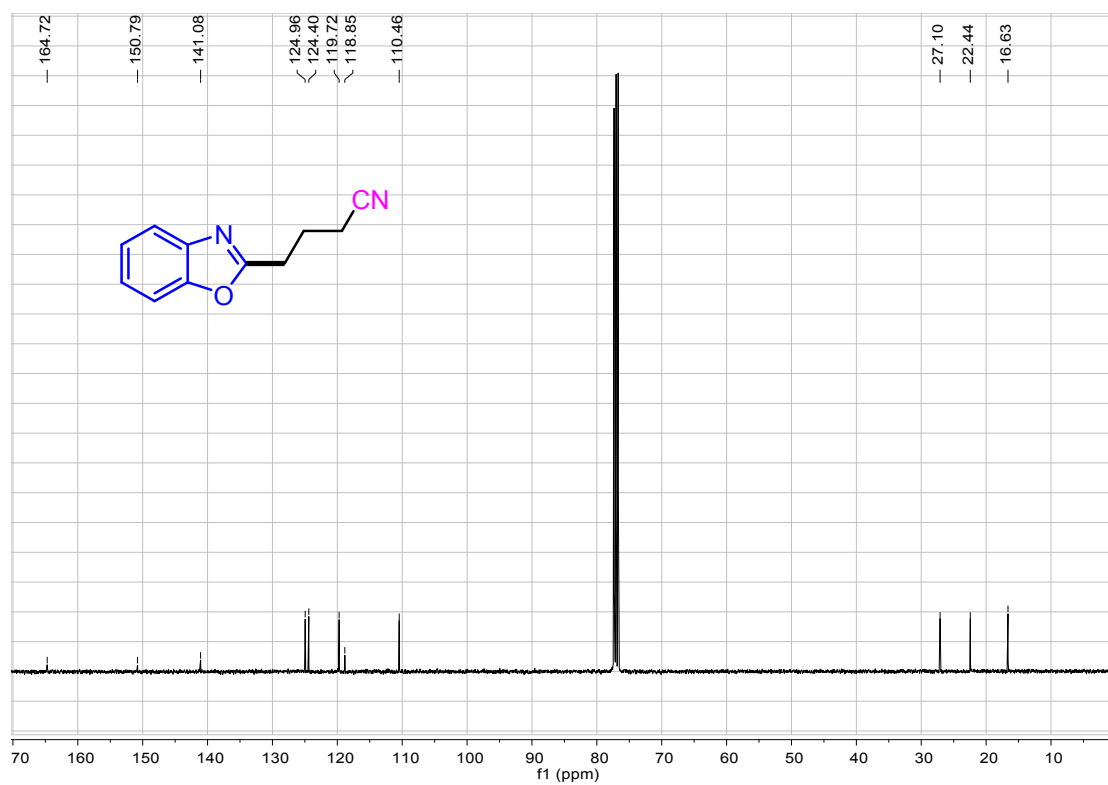



### <sup>1</sup>H NMR Spectrum of 7c

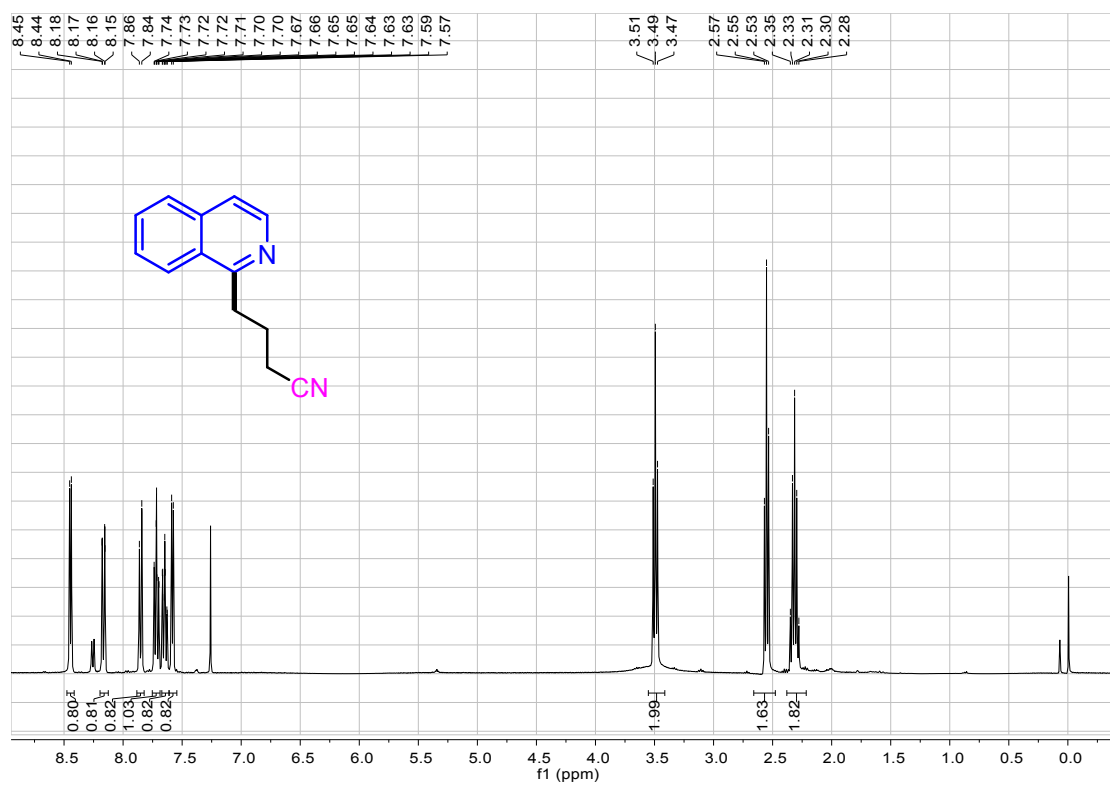

### <sup>13</sup>C NMR Spectrum of 7c

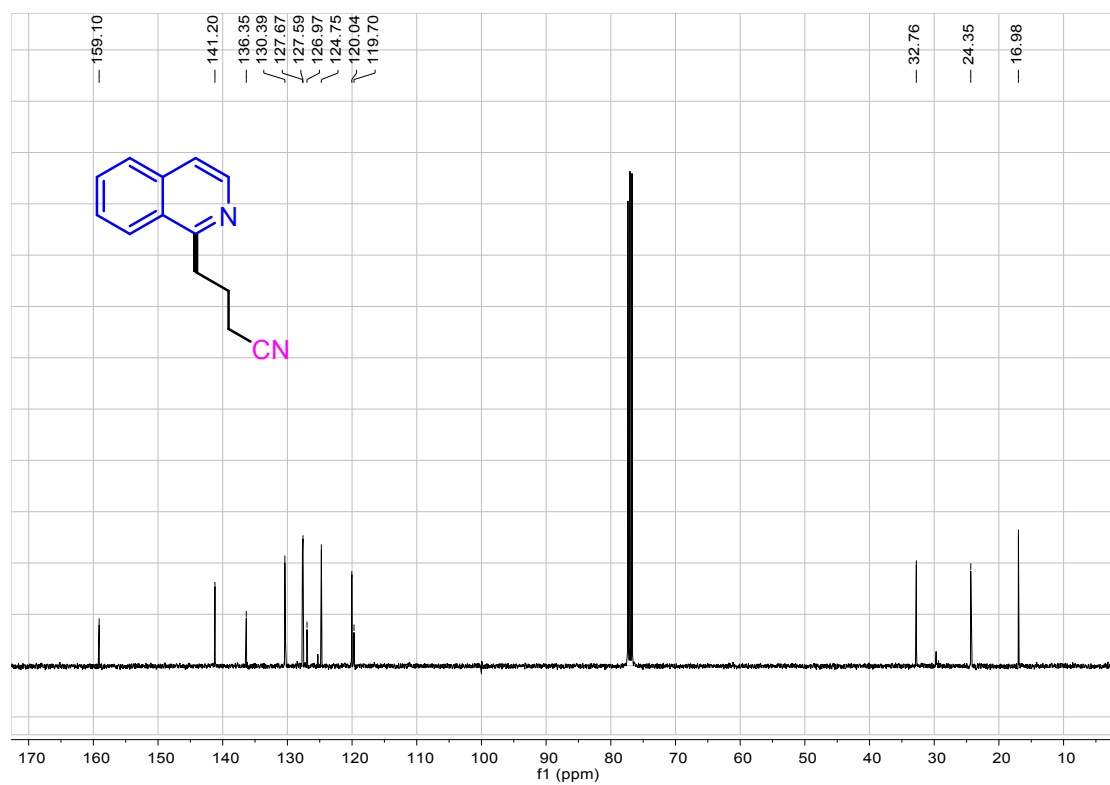

### <sup>1</sup>H NMR Spectrum of 7d

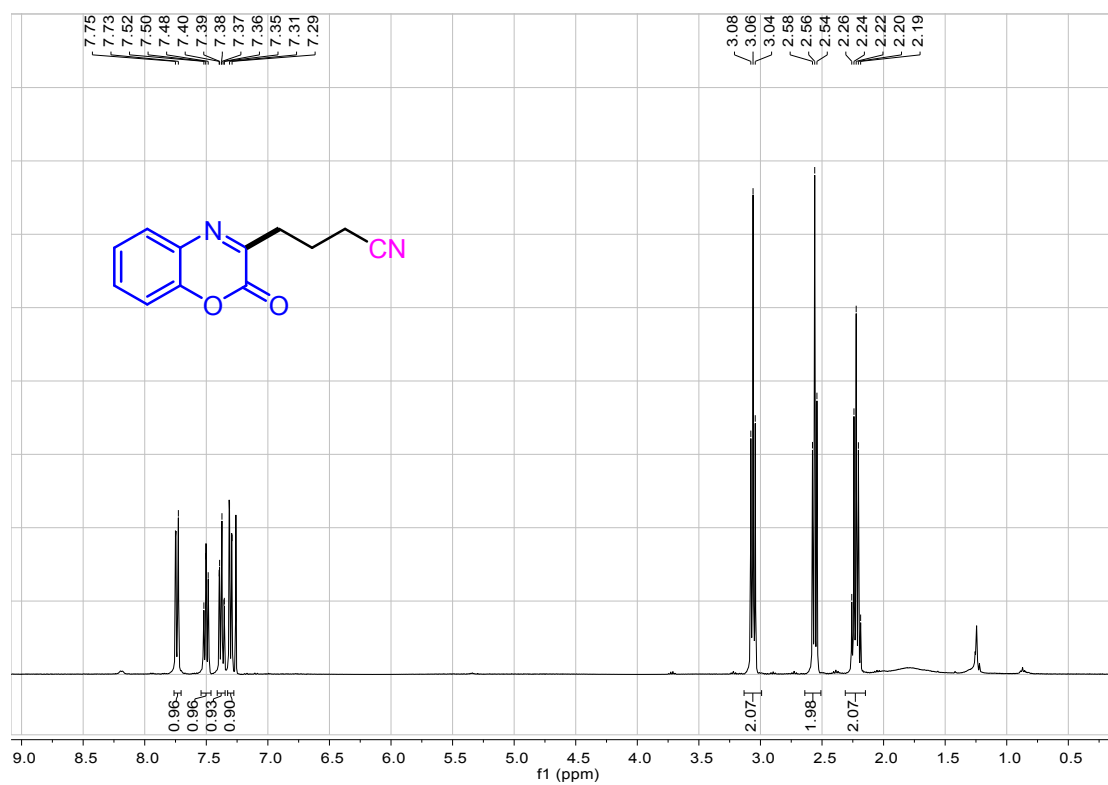

### <sup>13</sup>C NMR Spectrum of 7d

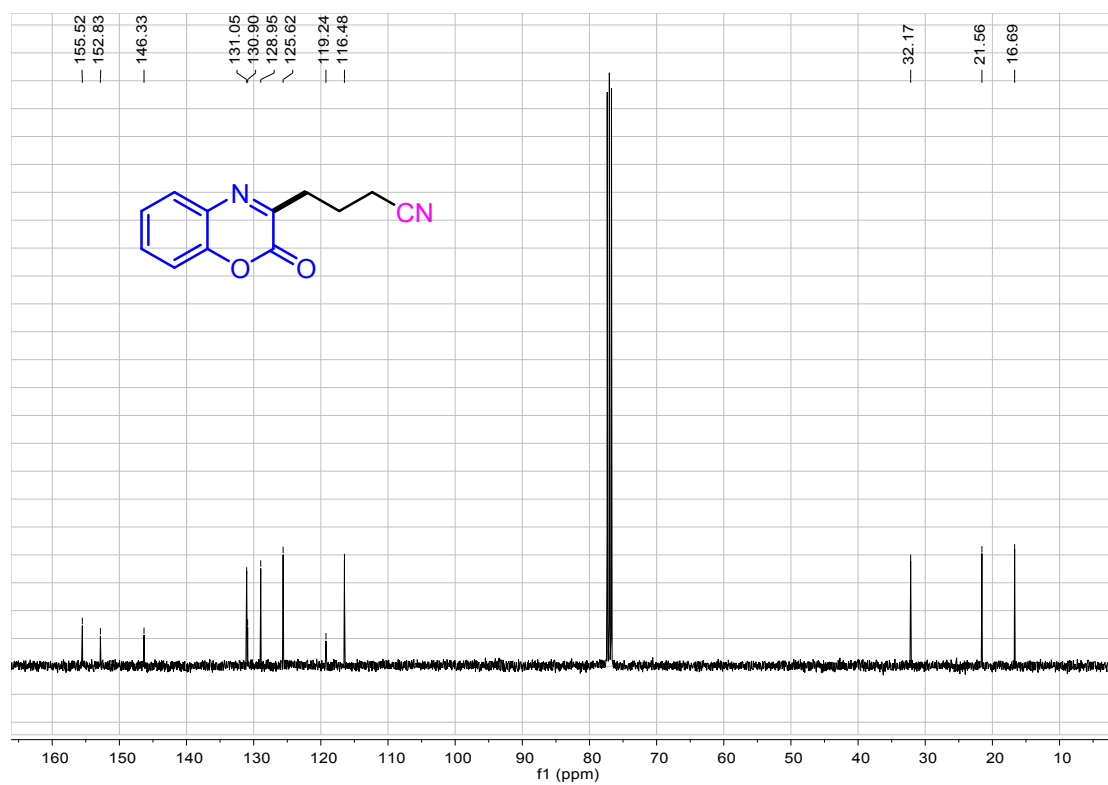

### <sup>1</sup>H NMR Spectrum of **8**

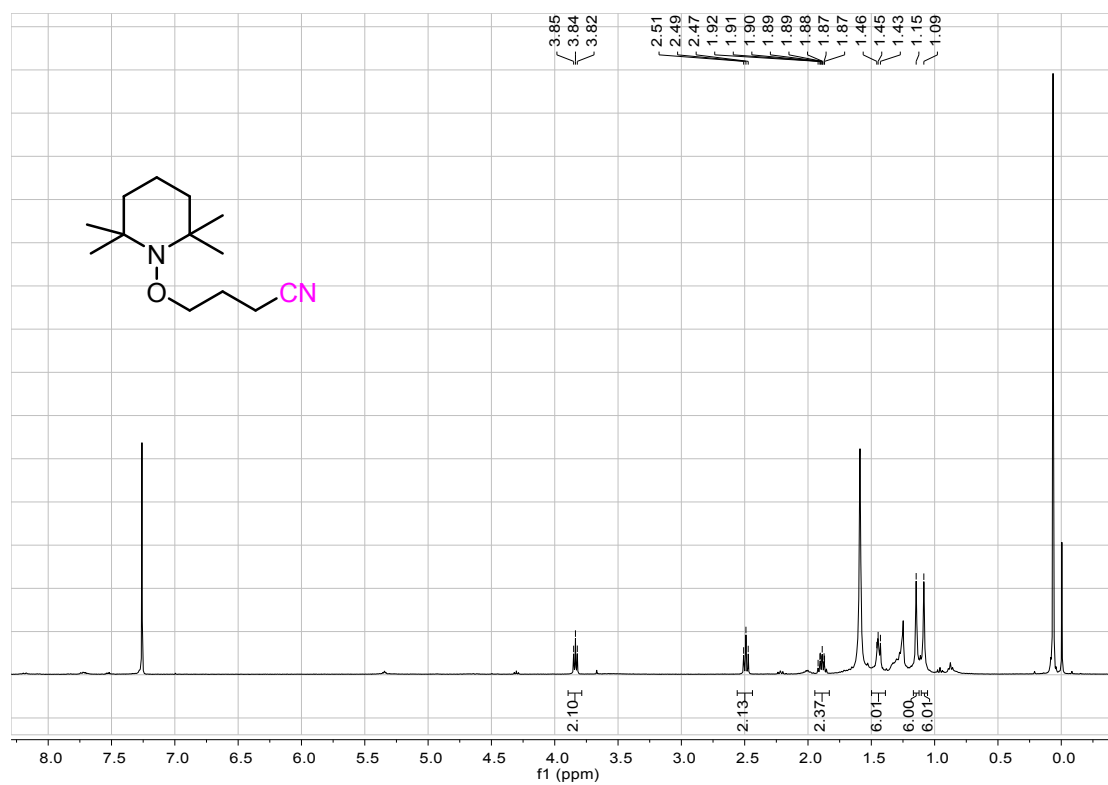

### <sup>13</sup>C NMR Spectrum of **8**

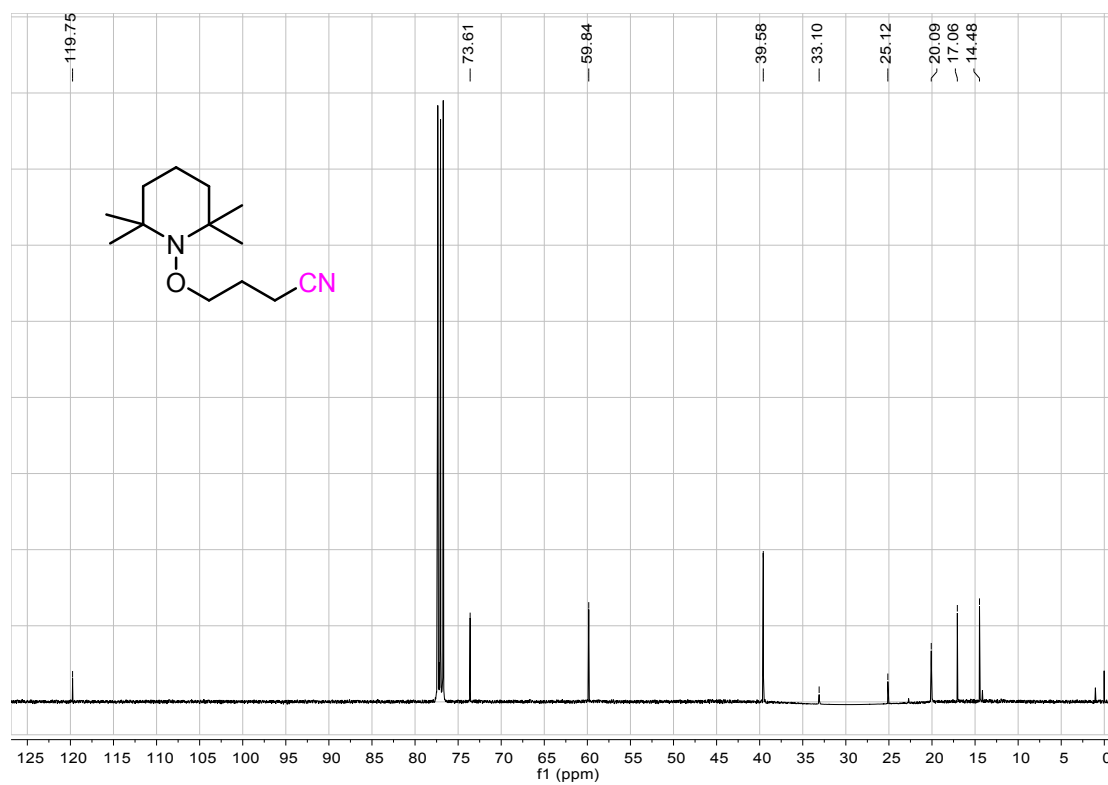

### <sup>1</sup>H NMR Spectrum of **9**

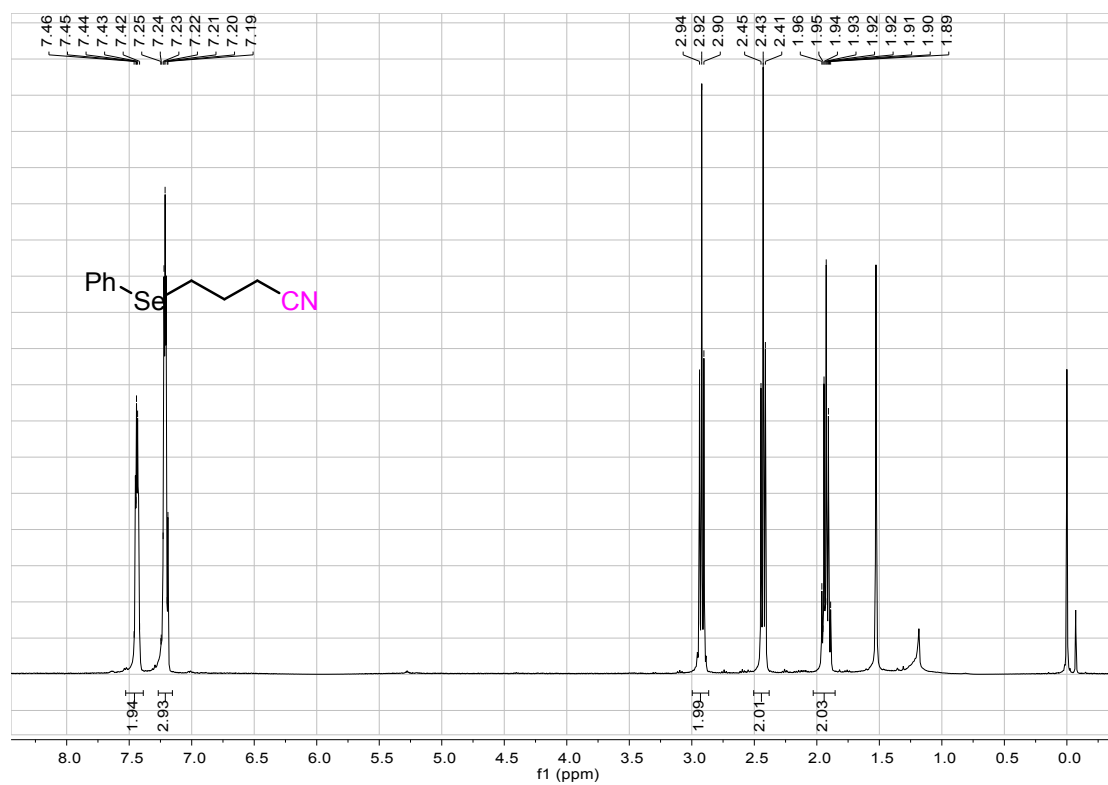

### <sup>13</sup>C NMR Spectrum of **9**

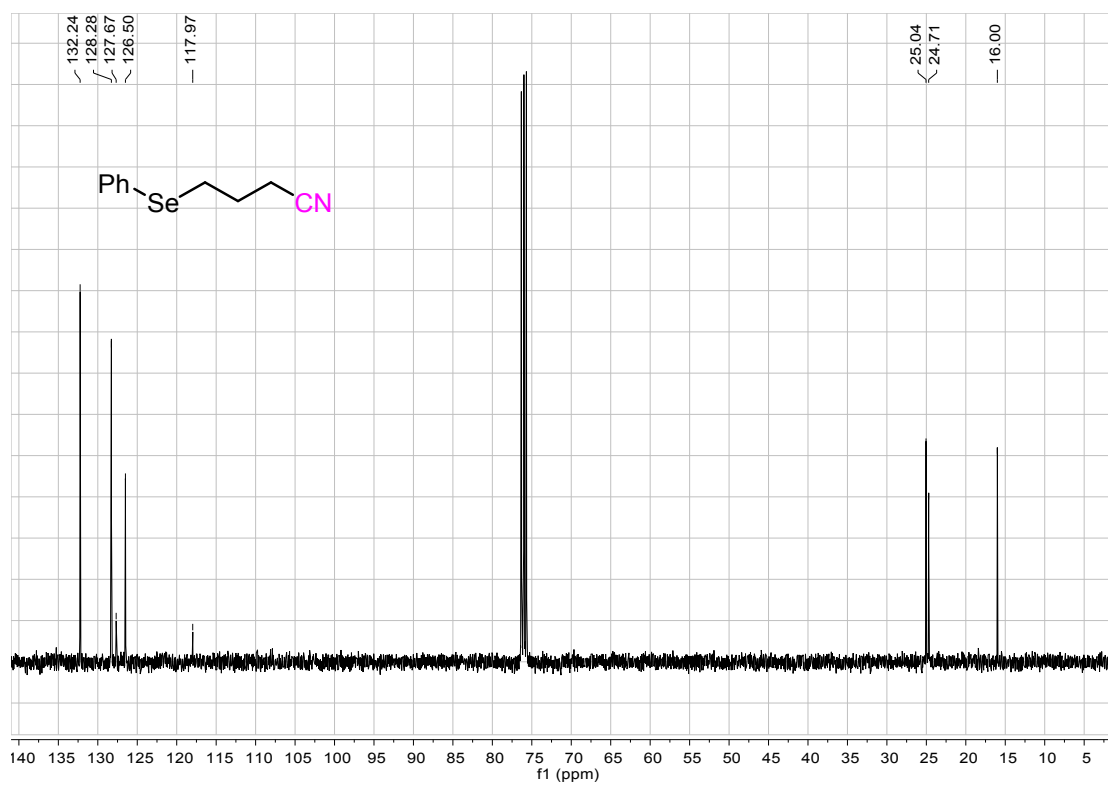

Supplement: c9qo00625g1.pdf [file c9qo00625g1.pdf]
